# Supplementary material
Source: PubMed Central journal article supplement (PMC5885871)
Supplement: jama-319-1221-s001.pdf [file jama-319-1221-s001.pdf]

Systematic review and network meta-analysis of IV indomethacin versus IV Ibuprofen versus oral Ibuprofen versus oral acetaminophen versus placebo for treatment of symptomatic patent ductus arteriosus in preterm infants

*Souvik Mitra, Lehana Thabane, Iván D. Florez, María E. Tamayo, Dagfinn Aune*

### Citation

Souvik Mitra, Lehana Thabane, Iván D. Florez, María E. Tamayo, Dagfinn Aune. Systematic review and network meta-analysis of IV indomethacin versus IV Ibuprofen versus oral Ibuprofen versus oral acetaminophen versus placebo for treatment of symptomatic patent ductus arteriosus in preterm infants. PROSPERO 2015 CRD42015015797 Available from:

[http://www.crd.york.ac.uk/PROSPERO/display\\_record.php?ID=CRD42015015797](http://www.crd.york.ac.uk/PROSPERO/display_record.php?ID=CRD42015015797)

### Review question

Systematic review and network meta-analysis comparing indomethacin, ibuprofen, acetaminophen with placebo for treatment of Patent Ductus Arteriosus in preterm infants.

### Searches

A systematic literature search would be conducted from the following electronic databases:

Cochrane Central Register of Controlled Trials (CENTRAL)

MEDLINE

PubMed

EMBASE

In addition, we will seek registered details of selected trials in the U.S. National Institutes of Health resource Clinicaltrials.gov. We would obtain information by personal communication, review the reference lists of relevant articles, abstracts and conference proceedings (Society for Pediatric Research, European Society for Paediatric Research 1990–2015) and seek results of unpublished trials. No language restrictions would be imposed.

The following keywords would be used to build our search strategy for each electronic database

1. Population:

Newborn Ductus

Ductus Arteriosus, Patent

Ductus (free term)

PDA

Persistent fetal circulation

AND

Newborn (free term)

Infant

Neonate

Preterm

Premature

2. Intervention and Control:

Indomethacin

Ibuprofen

paracetamol

placebo

Acetaminophen

Cox inhibitor

Prostaglandin synthetase inhibitor

NSAID (free)

Ant-Inflammatory Agents, Non-steroidal [Mesh]

3. Design:

Randomized controlled trials as a topic [Mesh]

Randomized Controlled trial [Publication type]

Clinical Trial

Randomized Controlled trial

### Types of study to be included

Randomized controlled trials

### Condition or domain being studied

Management of patent ductus arteriosus (PDA) in preterm infants is one of the most controversial topics in neonatal medicine. It is associated with a number of co-morbidities like necrotizing enterocolitis (NEC), bronchopulmonary dysplasia (BPD) and intraventricular hemorrhage (IVH). The management dilemmas have mainly centered on when to treat and with what to treat. To increase the complexity of matters, these two aspects of PDA management are not mutually exclusive, with the modality of treatment often being dictated by the timing of treatment. There have been a large number of published studies, meta-analyses, reviews, and editorials focusing on different aspects of management dilemmas. Regarding the timing of treatment, prophylactic therapy has gradually fallen out of favor and neonatal units have shifted towards a more conservative approach by treating only the clinically and echocardiographically significant PDAs. However, the big dilemma that still persists among neonatologists is what to use as the primary modality of treatment.

### Participants/population

Preterm infants with hemodynamically significant PDA

### Intervention(s), exposure(s)

1. Intravenous Indomethacin

or

2. Intravenous Ibuprofen

or

3. Oral Ibuprofen

or

4. Oral Acetaminophen

or

5. IV acetaminophen

Inclusion criteria: trials included in our review will have 1) Indomethacin or Ibuprofen or Acetaminophen being used for the treatment of clinically and/or echocardiographically determined hemodynamically significant PDA ; 2) have randomized infants to two intervention arms using the above mentioned drugs or an intervention arm using one of the above mentioned drugs and a control arm.

Exclusion criteria: use of any intervention for prophylaxis

### Comparator(s)/control

Any of the interventions or placebo

### Primary outcome(s)

Closure of PDA

### Secondary outcome(s)

Incidence of necrotizing enterocolitis

Incidence of oliguria

Duration of ventilatory support

### Data extraction (selection and coding)

### Risk of bias (quality) assessment

GRADE guidelines will be used for risk of bias assessment

### Strategy for data synthesis

Network meta-analysis will be done

Data will be analyzed as aggregate

Quantitative synthesis is planned

### Analysis of subgroups or subsets

None planned

### Contact details for further information

Dr Mitra

mitras@mcmaster.ca

### Organisational affiliation of the review

McMaster University

### Review team members and their organisational affiliations

Dr Souvik Mitra. McMaster University, Canada

Professor Lehana Thabane. McMaster University, Canada

Dr Iván D. Florez. Universidad de Antioquia, Colombia & McMaster University, Canada

Dr María E. Tamayo. Universidad de Antioquia, Colombia

Dr Dagfinn Aune. Norwegian University of Science and Technology, Trondheim, Norway; Imperial College London, London, UK

### Anticipated or actual start date

01 July 2015

### Anticipated completion date

01 April 2016

### Funding sources/sponsors

None

### Conflicts of interest

None known

### Language

English

### Country

England, Canada, Colombia

### Stage of review

Ongoing

### Subject index terms status

Subject indexing assigned by CRD

### Subject index terms

Acetaminophen; Cyclooxygenase Inhibitors; Ductus Arteriosus, Patent; Humans; Ibuprofen; Indomethacin; Infant, Newborn; Infant, Premature

### Date of registration in PROSPERO

30 June 2015

Date of publication of this version

30 June 2015

Revision note for this version

Details of search strategies including keywords and database sources have been specified on section # 16

Stage of review at time of this submission

| <b>Stage</b>                                                    | <b>Started</b> | <b>Completed</b> |
|-----------------------------------------------------------------|----------------|------------------|
| Preliminary searches                                            | Yes            | Yes              |
| Piloting of the study selection process                         | Yes            | No               |
| Formal screening of search results against eligibility criteria | No             | No               |
| Data extraction                                                 | No             | No               |
| Risk of bias (quality) assessment                               | No             | No               |
| Data analysis                                                   | No             | No               |

Revision note

Details of search strategies including keywords and database sources have been specified on section # 16

Versions

30 June 2015

30 June 2015

---

PROSPERO

This information has been provided by the named contact for this review. CRD has accepted this information in good faith and registered the review in PROSPERO. CRD bears no responsibility or liability for the content of this registration record, any associated files or external websites.
