# Supplementary material
Source: PubMed Central journal article supplement (PMC5885871)
Supplement: jama-319-1221-s003.pdf [file jama-319-1221-s003.pdf]

## Supplementary Online Content

Mitra S, Florez ID, Tamayo ME, et al. Association of placebo, indomethacin, ibuprofen, and acetaminophen with closure of hemodynamically significant patent ductus arteriosus in preterm infants: a systematic review and meta-analysis. *JAMA*. doi:10.1001/jama.2018.1896

This supplementary material has been provided by the authors to give readers additional information about their work.

### **Table of contents for Supplement 3**

| <b>eTables</b> |                                                                                                                                       | <b>Page(s)</b> |
|----------------|---------------------------------------------------------------------------------------------------------------------------------------|----------------|
| eTable 1       | Glossary of abbreviations, acronyms (including dosage & routes of administration of medications) and terms                            | 3              |
| eTable 2       | Electronic Database Search Strategies                                                                                                 | 4              |
| eTable 3       | LIST OF EXCLUDED STUDIES after full text screening                                                                                    | 6-8            |
| eTable 4       | Clinical & Methodological Characteristics of included studies                                                                         | 9-16           |
| eTable 5       | GRADE assessment of the Quality of Evidence (QoE) for the network for PDA closure                                                     | 22-23          |
| eTable 6       | Ranking statistics for each treatment modality for PDA closure                                                                        | 24             |
| eTable 7       | GRADE assessment of the Quality of Evidence (QoE) for the network for need for repeat pharmacotherapy                                 | 26-27          |
| eTable 8       | Ranking statistics for each treatment modality for outcome need for repeat pharmacotherapy                                            | 28             |
| eTable 9       | GRADE assessment of the Quality of Evidence (QoE) for the network for need for surgical PDA ligation                                  | 30-31          |
| eTable 10      | Ranking statistics for each treatment modality for need for surgical PDA ligation                                                     | 32             |
| eTable 11      | GRADE assessment of the Quality of Evidence (QoE) for the network for neonatal mortality                                              | 34-35          |
| eTable 12      | Ranking statistics for each treatment modality for neonatal mortality                                                                 | 36             |
| eTable 13      | GRADE assessment of the Quality of Evidence (QoE) for the network for risk of NEC                                                     | 38-39          |
| eTable 14      | Ranking statistics for each treatment modality for risk of necrotizing enterocolitis (NEC)                                            | 40             |
| eTable 15      | GRADE assessment of the Quality of Evidence (QoE) for the network for risk of BPD                                                     | 42             |
| eTable 16      | Ranking statistics for each treatment modality for risk of bronchopulmonary dysplasia (BPD)                                           | 43             |
| eTable 17      | GRADE assessment of the Quality of Evidence (QoE) for the network for risk of IVH                                                     | 45-46          |
| eTable 18      | Ranking statistics for each treatment modality for risk of intraventricular hemorrhage (IVH)                                          | 47             |
| eTable 19      | GRADE assessment of the Quality of Evidence (QoE) for the network for risk of Oliguria                                                | 49-50          |
| eTable 20      | Ranking statistics for each treatment modality for risk of Oliguria                                                                   | 51             |
| eTable 21      | Network effect estimates for PDA closure on sensitivity analysis ('low' & 'probably low' risk of bias studies)                        | 52             |
| eTable 22      | Ranking statistics for PDA closure on sensitivity analysis ('low' & 'probably low' risk of bias studies)                              | 53             |
| eTable 23      | Network effect estimates for need for repeat pharmacotherapy on sensitivity analysis ('low' & 'probably low' risk of bias studies)    | 53             |
| eTable 24      | Ranking statistics for need for repeat pharmacotherapy on sensitivity analysis ('low' & 'probably low' risk of bias studies)          | 54             |
| eTable 25      | Network effect estimates for need for surgical PDA ligation on sensitivity analysis ('low' & 'probably low' risk of bias studies)     | 55             |
| eTable 26      | Ranking statistics for need for surgical PDA ligation on sensitivity analysis ('low' & 'probably low' risk of bias studies)           | 56             |
| eTable 27      | Network effect estimates for neonatal mortality on sensitivity analysis ('low' & 'probably low' risk of bias studies)                 | 56             |
| eTable 28      | Ranking statistics for neonatal mortality on sensitivity analysis ('low' & 'probably low' risk of bias studies)                       | 57             |
| eTable 29      | Network effect estimates for risk of necrotizing enterocolitis on sensitivity analysis ('low' & 'probably low' risk of bias studies)  | 58             |
| eTable 30      | Ranking statistics for risk of necrotizing enterocolitis on sensitivity analysis ('low' & 'probably low' risk of bias studies)        | 59             |
| eTable 31      | Network effect estimates for risk of bronchopulmonary dysplasia on sensitivity analysis ('low' & 'probably low' risk of bias studies) | 59             |
| eTable 32      | Ranking statistics for risk of bronchopulmonary dysplasia on sensitivity analysis ('low' & 'probably low' risk of bias studies)       | 60             |

| <b>eTables</b>  |                                                                                                                                                                                                                                               | <b>Page(s)</b> |
|-----------------|-----------------------------------------------------------------------------------------------------------------------------------------------------------------------------------------------------------------------------------------------|----------------|
| eTable 33       | Network effect estimates for risk of intraventricular hemorrhage on sensitivity analysis ('low' & 'probably low' risk of bias studies)                                                                                                        | 61             |
| eTable 34       | Ranking statistics for risk of intraventricular hemorrhage on sensitivity analysis ('low' & 'probably low' risk of bias studies)                                                                                                              | 62             |
| eTable 35       | Network effect estimates for risk of oliguria on sensitivity analysis ('low' & 'probably low' risk of bias studies)                                                                                                                           | 62             |
| eTable 36       | Ranking statistics for risk of oliguria on sensitivity analysis ('low' & 'probably low' risk of bias studies)                                                                                                                                 | 63             |
| eTable 37       | Meta-regression analysis results for outcome: PDA Closure                                                                                                                                                                                     | 65             |
| eTable 38       | Meta-regression analysis corresponding SUCRA values: PDA Closure                                                                                                                                                                              | 65             |
| eTable 39       | Meta-regression analysis results for outcome: Need for repeat pharmacotherapy                                                                                                                                                                 | 66             |
| eTable 40       | Meta-regression analysis corresponding SUCRA values: Need for repeat pharmacotherapy                                                                                                                                                          | 66             |
| eTable 41       | Meta-regression analysis results for outcome: Neonatal Mortality                                                                                                                                                                              | 67             |
| eTable 42       | Meta-regression analysis corresponding SUCRA values: Neonatal Mortality                                                                                                                                                                       | 67             |
| eTable 43       | Meta-regression analysis results for outcome: Risk of Necrotizing Enterocolitis                                                                                                                                                               | 68             |
| eTable 44       | Meta-regression analysis corresponding SUCRA values: Risk of Necrotizing Enterocolitis                                                                                                                                                        | 68             |
| <b>eFigures</b> |                                                                                                                                                                                                                                               | <b>Page(s)</b> |
| eFigure 1       | Specific instructions for estimating unclearly reported blinding status                                                                                                                                                                       | 5              |
| eFigure 2       | Detailed Risk of Bias assessment of individual studies                                                                                                                                                                                        | 17             |
| eFigure 3       | Assessment summary across the risk of bias items                                                                                                                                                                                              | 18             |
| eFigure 4       | Network meta-analysis forest plots for outcome: PDA closure                                                                                                                                                                                   | 21             |
| eFigure 5       | Ranking probability (rankogram) of each treatment modality for PDA closure                                                                                                                                                                    | 24             |
| eFigure 6       | Network meta-analysis forest plots for outcome: Need for repeat pharmacotherapy                                                                                                                                                               | 25             |
| eFigure 7       | Ranking probability (rankogram) of each treatment modality for need for repeat pharmacotherapy                                                                                                                                                | 28             |
| eFigure 8       | Network meta-analysis forest plots for outcome: Need for surgical PDA ligation                                                                                                                                                                | 29             |
| eFigure 9       | Ranking probability (rankogram) of each treatment modality for need for surgical PDA ligation                                                                                                                                                 | 32             |
| eFigure 10      | Network meta-analysis forest plots for outcome: Neonatal Mortality                                                                                                                                                                            | 33             |
| eFigure 11      | Ranking probability (rankogram) of each treatment modality for neonatal mortality                                                                                                                                                             | 36             |
| eFigure 12      | Network meta-analysis forest plots for outcome: Risk of necrotizing enterocolitis (NEC)                                                                                                                                                       | 37             |
| eFigure 13      | Ranking probability (rankogram) of each treatment modality for risk of NEC                                                                                                                                                                    | 40             |
| eFigure 14      | Network meta-analysis forest plots for outcome: Risk of bronchopulmonary dysplasia (BPD)                                                                                                                                                      | 41             |
| eFigure 15      | Ranking probability (rankogram) of each treatment modality for risk of BPD                                                                                                                                                                    | 43             |
| eFigure 16      | Network meta-analysis forest plots for outcome: Risk of intraventricular hemorrhage (IVH)                                                                                                                                                     | 44             |
| eFigure 17      | Ranking probability (rankogram) of each treatment modality for risk of IVH                                                                                                                                                                    | 47             |
| eFigure 18      | Network meta-analysis forest plots for outcome: Risk of Oliguria                                                                                                                                                                              | 48             |
| eFigure 19      | Ranking probability (rankogram) of each treatment modality for risk of Oliguria                                                                                                                                                               | 51             |
| eFigure 20      | Rankogram for PDA closure on sensitivity analysis ('low' & 'probably low' risk of bias studies)                                                                                                                                               | 52             |
| eFigure 21      | Rankogram for need for repeat pharmacotherapy on sensitivity analysis ('low' & 'probably low' risk of bias studies)                                                                                                                           | 54             |
| eFigure 22      | Rankogram for need for surgical PDA ligation on sensitivity analysis ('low' & 'probably low' risk of bias studies)                                                                                                                            | 55             |
| eFigure 23      | Rankogram for neonatal mortality on sensitivity analysis ('low' & 'probably low' risk of bias studies)                                                                                                                                        | 57             |
| eFigure 24      | Rankogram for risk of necrotizing enterocolitis on sensitivity analysis ('low' & 'probably low' risk of bias studies)                                                                                                                         | 58             |
| eFigure 25      | Rankogram for risk of bronchopulmonary dysplasia on sensitivity analysis ('low' & 'probably low' risk of bias studies)                                                                                                                        | 60             |
| eFigure 26      | Rankogram for risk of intraventricular hemorrhage on sensitivity analysis ('low' & 'probably low' risk of bias studies)                                                                                                                       | 61             |
| eFigure 27      | Rankogram for risk of oliguria on sensitivity analysis ('low' & 'probably low' risk of bias studies)                                                                                                                                          | 63             |
| <b>eTexts</b>   |                                                                                                                                                                                                                                               | <b>Page(s)</b> |
| eText 1         | Risk of Bias Assessment of eligible studies                                                                                                                                                                                                   | 5              |
| eText 2         | Guide to interpreting network meta-analysis results (rankograms; SUCRA; Network GRADE) <i>(Includes rankogram example figure; SUCRA example table; network plot example for first-order loop; network plot example for second-order loop)</i> | 19-20          |
| eText 3         | Guide to interpreting meta-regression results <i>(Included Example tables A &amp; B)</i>                                                                                                                                                      | 64             |
|                 | References in the Supplement                                                                                                                                                                                                                  | 69             |

**eTable 1. Glossary of abbreviations, acronyms (including dosage & routes of administration of medications) and terms**

| <b>Abbreviations</b>                                                      |                                                                                                                                                                                                                        |
|---------------------------------------------------------------------------|------------------------------------------------------------------------------------------------------------------------------------------------------------------------------------------------------------------------|
| •                                                                         | PDA: Patent ductus arteriosus                                                                                                                                                                                          |
| •                                                                         | Hs-PDA: hemodynamically-significant PDA                                                                                                                                                                                |
| •                                                                         | CENTRAL: Cochrane Central Register of Controlled Trials                                                                                                                                                                |
| •                                                                         | NEC: Necrotizing enterocolitis                                                                                                                                                                                         |
| •                                                                         | BPD: bronchopulmonary dysplasia                                                                                                                                                                                        |
| •                                                                         | IVH: Intraventricular hemorrhage                                                                                                                                                                                       |
| •                                                                         | RCT: Randomized Controlled Trial                                                                                                                                                                                       |
| •                                                                         | OR: Odds ratio                                                                                                                                                                                                         |
| •                                                                         | CrI: Credible interval                                                                                                                                                                                                 |
| •                                                                         | SUCRA: Surface under the cumulative ranking                                                                                                                                                                            |
| •                                                                         | PROSPERO: International prospective register of systematic reviews                                                                                                                                                     |
| •                                                                         | DA: ductus arteriosus                                                                                                                                                                                                  |
| •                                                                         | NMA: Network meta-analysis                                                                                                                                                                                             |
| •                                                                         | ISPOR: International Society For Pharmacoeconomics and Outcomes Research                                                                                                                                               |
| •                                                                         | PRISMA: Preferred Reporting Items for Systematic Reviews and Meta-Analyses                                                                                                                                             |
| •                                                                         | ECHO: echocardiography                                                                                                                                                                                                 |
| •                                                                         | RoB: Risk of Bias                                                                                                                                                                                                      |
| •                                                                         | RE: Random effects                                                                                                                                                                                                     |
| •                                                                         | DBT: Design by treatment                                                                                                                                                                                               |
| •                                                                         | GRADE: Grading of Recommendations Assessment, Development and Evaluation                                                                                                                                               |
| •                                                                         | RR: Relative Risk                                                                                                                                                                                                      |
| •                                                                         | CI: Confidence intervals                                                                                                                                                                                               |
| •                                                                         | AUC: Area under the curve                                                                                                                                                                                              |
| •                                                                         | BW: Birth weight                                                                                                                                                                                                       |
| •                                                                         | GA: Gestational age                                                                                                                                                                                                    |
| <b>Acronyms for pharmacotherapeutic options (with routes &amp; doses)</b> |                                                                                                                                                                                                                        |
| •                                                                         | INDOIV: Intravenous (IV) indomethacin standard dose (0.1-0.3 mg/kg IV every 12-24h for a total of 3 doses)                                                                                                             |
| •                                                                         | IBUIV: Intravenous ibuprofen standard dose (10 mg/kg IV followed by 5mg/kg IV every 12-24 h for a total of 3 doses)                                                                                                    |
| •                                                                         | IBUPO: Oral ibuprofen standard dose (10 mg/kg oral followed by 5mg/kg oral every 12-24 h for a total of 3 doses)                                                                                                       |
| •                                                                         | PARAPO: Oral acetaminophen 15 mg/kg/dose four times a day for 3-7 days                                                                                                                                                 |
| •                                                                         | IBUPOHIGHDOSE: Oral ibuprofen high dose (15-20 mg/kg oral followed by 7.5-10 mg/kg oral every 12-24 h for a total of 3 doses)                                                                                          |
| •                                                                         | IBUIVHIGHDOSE: Intravenous ibuprofen high dose (15-20 mg/kg IV followed by 7.5-10 mg/kg IV every 12-24 h for a total of 3 doses)                                                                                       |
| •                                                                         | INDOIVCONT: Intravenous indomethacin infused continuously for 36 h at a rate of 17 mcg/kg/h                                                                                                                            |
| •                                                                         | IBUIVCONT: Intravenous ibuprofen continuous infusions of 10mg/kg (0.416 mg/kg/h), 5 mg/kg (0.208 mg/kg/h) and 5 mg/kg(0.208 mg/kg/h), and boluses of equal volumes of 5% dextrose administered over 15 min, 24 h apart |
| •                                                                         | INDOPO: Oral indomethacin standard dose (dose same as INDOIV)                                                                                                                                                          |
| •                                                                         | INDOIVHIGHDOSE: Intravenous indomethacin 0.2-0.5mg/kg every day for 3 days                                                                                                                                             |
| •                                                                         | INDOIVPROLONGED: Intravenous indomethacin prolonged treatment course (0.1-0.15 mg/kg every 12-24 h for 5-7 days).                                                                                                      |
| •                                                                         | INDOIVLATE: Intravenous indomethacin standard dose (dose same as INDOIV); late initiation of therapy (started on or beyond day 7)                                                                                      |
| •                                                                         | INDOIVFRU: Intravenous indomethacin standard dose (dose same as INDOIV) along with Frusemide                                                                                                                           |
| •                                                                         | INDOIVECHOGUIDED: Intravenous indomethacin standard dose (dose same as INDOIV); duration guided by echo assessment of PDA                                                                                              |
| •                                                                         | INDOTHERS: Indomethacin, other types (INDOPO + INDOIVLATE + INDOIVFRU + INDOIVECHOGUIDED + INDOIVHIGHDOSE + INDOIVPROLONGED)                                                                                           |
| •                                                                         | PLAC: Placebo                                                                                                                                                                                                          |
| •                                                                         | NORX: No treatment                                                                                                                                                                                                     |
| •                                                                         | PLAC_NORX: Placebo + No treatment                                                                                                                                                                                      |

**eTable 2. Electronic Database Search Strategies**

| MEDLINE (on OVID platform)                                                                                                                                                                                                                                                                                                                                                                                                                                                                                                                                                                                                                                                                                                                                                                                                                                                                                                                                                                                                                                                                                                                                                                                                                                                                                                                                                                                                                                                                                                                                                                                                                                                                                                                                                                                                                                                                                                                                                                                                                                                                                                                                                                                                                                                                                                              | EMBASE (on OVID platform)                                                                                                                                                                                                                                                                                                                                                                                                                                                                                                                                                                                                                                                                                                                                                                                                                                                                                                                                                                                                                                                                                                                                                                                                                                                                                                                                                                                                                                                                                                                                                                                                                                                                                                                                                                                                                                                                                                                | CENTRAL (Cochrane Central Register of Controlled Trials)                                                                                                                                                                                                                                                                                                                                                                                                                                                                                                                                                                                                                                                                                                                                                                                                                                                                                                                                                                                                                                                       |
|-----------------------------------------------------------------------------------------------------------------------------------------------------------------------------------------------------------------------------------------------------------------------------------------------------------------------------------------------------------------------------------------------------------------------------------------------------------------------------------------------------------------------------------------------------------------------------------------------------------------------------------------------------------------------------------------------------------------------------------------------------------------------------------------------------------------------------------------------------------------------------------------------------------------------------------------------------------------------------------------------------------------------------------------------------------------------------------------------------------------------------------------------------------------------------------------------------------------------------------------------------------------------------------------------------------------------------------------------------------------------------------------------------------------------------------------------------------------------------------------------------------------------------------------------------------------------------------------------------------------------------------------------------------------------------------------------------------------------------------------------------------------------------------------------------------------------------------------------------------------------------------------------------------------------------------------------------------------------------------------------------------------------------------------------------------------------------------------------------------------------------------------------------------------------------------------------------------------------------------------------------------------------------------------------------------------------------------------|------------------------------------------------------------------------------------------------------------------------------------------------------------------------------------------------------------------------------------------------------------------------------------------------------------------------------------------------------------------------------------------------------------------------------------------------------------------------------------------------------------------------------------------------------------------------------------------------------------------------------------------------------------------------------------------------------------------------------------------------------------------------------------------------------------------------------------------------------------------------------------------------------------------------------------------------------------------------------------------------------------------------------------------------------------------------------------------------------------------------------------------------------------------------------------------------------------------------------------------------------------------------------------------------------------------------------------------------------------------------------------------------------------------------------------------------------------------------------------------------------------------------------------------------------------------------------------------------------------------------------------------------------------------------------------------------------------------------------------------------------------------------------------------------------------------------------------------------------------------------------------------------------------------------------------------|----------------------------------------------------------------------------------------------------------------------------------------------------------------------------------------------------------------------------------------------------------------------------------------------------------------------------------------------------------------------------------------------------------------------------------------------------------------------------------------------------------------------------------------------------------------------------------------------------------------------------------------------------------------------------------------------------------------------------------------------------------------------------------------------------------------------------------------------------------------------------------------------------------------------------------------------------------------------------------------------------------------------------------------------------------------------------------------------------------------|
| <ol style="list-style-type: none"> <li>1. Infant, Premature/ or Premature Birth/ or Infant, Newborn/ or Infant, Premature, Diseases/ or preterm.mp.</li> <li>2. low birth weight.mp. or Infant, Low Birth Weight/</li> <li>3. very low birth weight.mp. or Infant, Very Low Birth Weight/</li> <li>4. Infant, Extremely Low Birth Weight/</li> <li>5. 1 or 2 or 3 or 4</li> <li>6. Ductus Arteriosus, Patent/</li> <li>7. patent ductus arteriosus.mp.</li> <li>8. ductus arteriosus.mp. or Ductus Arteriosus/</li> <li>9. ductus.mp.</li> <li>10. PDA.mp.</li> <li>11. persistent ductus arteriosus.mp.</li> <li>12. 6 or 7 or 8 or 9 or 10 or 11</li> <li>13. indomethacin.mp. or Indomethacin/</li> <li>14. indometacin.mp.</li> <li>15. indocid.mp.</li> <li>16. ibuprofen.mp. or Ibuprofen/</li> <li>17. brufen.mp.</li> <li>18. paracetamol.mp. or Acetaminophen/</li> <li>19. tylenol.mp.</li> <li>20. Anti-Inflammatory Agents, Non-Steroidal/</li> <li>21. Cyclooxygenase Inhibitors/ or prostaglandin synthetase inhibitor.mp.</li> <li>22. 13 or 14 or 15 or 16 or 17 or 18 or 19 or 20 or 21</li> <li>23. 5 and 12 and 22</li> <li>24. Randomized Controlled Trial/</li> <li>25. randomized controlled trials.mp.</li> <li>26. Random Allocation/</li> <li>27. Double-Blind Method/</li> <li>28. Single-Blind Method/</li> <li>29. Clinical Trial/</li> <li>30. clinical trial,phase i.pt.</li> <li>31. clinical trial,phase ii.pt.</li> <li>32. clinical trial,phase iii.pt.</li> <li>33. clinical trial,phase iv.pt.</li> <li>34. controlled clinical trial.pt.</li> <li>35. randomized controlled trial.pt.</li> <li>36. multicenter study.pt.</li> <li>37. clinical trial.pt.</li> <li>38. Clinical Trial/</li> <li>39. 24 or 25 or 26 or 27 or 28 or 29 or 30 or 31 or 32 or 33 or 34 or 35 or 36 or 37 or 38</li> <li>40. (clinical adj trial\$.tw.</li> <li>41. ((singl\$ or doubl\$ or treb\$ or tripl\$) adj (blind\$3 or mask\$3)).tw.</li> <li>42. PLACEBOS/</li> <li>43. placebo\$.tw.</li> <li>44. randomly allocated.tw.</li> <li>45. allocated adj2 random\$.tw.</li> <li>46. 40 or 41 or 42 or 43 or 44 or 45</li> <li>47. 39 or 46</li> <li>48. case report.tw.</li> <li>49. letter/</li> <li>50. historical article/</li> <li>51. 48 or 49 or 50</li> <li>52. 47 not 51</li> <li>53. 23 and 52</li> </ol> | <ol style="list-style-type: none"> <li>1. Infant, Premature/</li> <li>2. Premature Birth/</li> <li>3. Infant, Newborn/</li> <li>4. Infant, Premature, Diseases/</li> <li>5. preterm.mp.</li> <li>6. low birth weight.mp.</li> <li>7. Infant, Low Birth Weight/</li> <li>8. very low birth weight.mp.</li> <li>9. Infant, Extremely Low Birth Weight/</li> <li>10. lbw.mp.</li> <li>11. vlbw.mp.</li> <li>12. or/1-11</li> <li>13. Ductus Arteriosus, Patent/</li> <li>14. patent ductus arteriosus.mp.</li> <li>15. ductus arteriosus.mp.</li> <li>16. Ductus Arteriosus/</li> <li>17. ductus.mp.</li> <li>18. PDA.mp.</li> <li>19. persistent ductus arteriosus.mp.</li> <li>20. or/13-19</li> <li>21. indomethacin.mp.</li> <li>22. Indomethacin/</li> <li>23. indometacin.mp.</li> <li>24. indocid.mp.</li> <li>25. ibuprofen.mp.</li> <li>26. Ibuprofen/</li> <li>27. brufen.mp.</li> <li>28. paracetamol.mp.</li> <li>29. Acetaminophen/</li> <li>30. tylenol.mp.</li> <li>31. acetaminophen.mp.</li> <li>32. Anti-Inflammatory Agents, Non-Steroidal/</li> <li>33. Cyclooxygenase Inhibitors/</li> <li>34. prostaglandin synthetase inhibitor.mp.</li> <li>35. NSAID?.mp.</li> <li>36. or/21-35</li> <li>37. 12 and 20 and 36</li> <li>38. Randomized Controlled Trial/</li> <li>39. randomized controlled trials.mp.</li> <li>40. Random Allocation/</li> <li>41. Double-Blind Method/</li> <li>42. Single-Blind Method/</li> <li>43. Clinical Trial/</li> <li>44. randomized controlled trial.pt.</li> <li>45. clinical trial.pt.</li> <li>46. Clinical Trial/</li> <li>47. or/38-46</li> <li>48. (clinical adj trial\$.tw.</li> <li>49. ((singl\$ or doubl\$ or treb\$ or tripl\$) adj (blind\$3 or mask\$3)).tw.</li> <li>50. PLACEBOS/</li> <li>51. placebo\$.tw.</li> <li>52. randomly allocated.tw.</li> <li>53. (allocated adj2 random\$.tw.</li> <li>54. or/48-53</li> <li>55. 47 or 54</li> <li>56. 37 and 55</li> </ol> | <ol style="list-style-type: none"> <li>#1 infant, premature</li> <li>#2 Premature Birth</li> <li>#3 Infant, Newborn</li> <li>#4 Infant, Premature, Diseases</li> <li>#5 preterm.mp.</li> <li>#6 low birth weight.mp.</li> <li>#7 Infant, Low Birth Weight</li> <li>#8 very low birth weight.mp.</li> <li>#9 Infant, Extremely Low Birth Weight</li> <li>#10 lbw.mp.</li> <li>#11 #1 or #2 or #3 or #4 or #5 or #6 or #7 or #8 or #9 or #10</li> <li>#12 Ductus Arteriosus, Patent</li> <li>#13 Ductus Arteriosus</li> <li>#14 PDA.mp.</li> <li>#15 #12 or #13 or #14</li> <li>#16 Indomethacin</li> <li>#17 indomethacin.mp.</li> <li>#18 indometacin.mp.</li> <li>#19 ibuprofen.mp.</li> <li>#20 Ibuprofen</li> <li>#21 brufen.mp.</li> <li>#22 paracetamol.mp.</li> <li>#23 Acetaminophen</li> <li>#24 tylenol.mp.</li> <li>#25 Anti-Inflammatory Agents, Non-Steroidal</li> <li>#26 Cyclooxygenase Inhibitors</li> <li>#27 prostaglandin synthetase inhibitor.mp.</li> <li>#28 #16 or #17 or #18 or #19 or #20 or #21 or #22 or #23 or #24 or #25 or #26 or #27</li> <li>#29 #11 and #15 and #28</li> </ol> |

## **eText 1. Risk of Bias Assessment of eligible studies**

The risk of bias of eligible studies was assessed according to a modified and validated version of the Cochrane Collaboration's ROB tool (1). The six criteria that were assessed included sequence generation, allocation concealment, blinding of participants, personnel and outcome assessors, completeness of follow up, selective outcome reporting, and presence of other biases. Each domain was assigned a score of 'definitely low risk', or 'definitely high risk' or 'unclear risk'. 'Unclear risk' was further categorized to 'probably low risk', or 'probably high risk' based on specific instructions provided to the reviewers provided in the flow diagram below (eFigure 1) (2). This has been adapted from the tool validated by Akl et al (2). Two independent reviewers assessed the risk of bias. Disagreements between two reviewers when assessing the risk of bias was resolved through consensus. If a consensus was not reached, the disagreement was resolved by a third reviewer.

### **eFigure 1. Specific instructions for estimating unclearly reported blinding status**

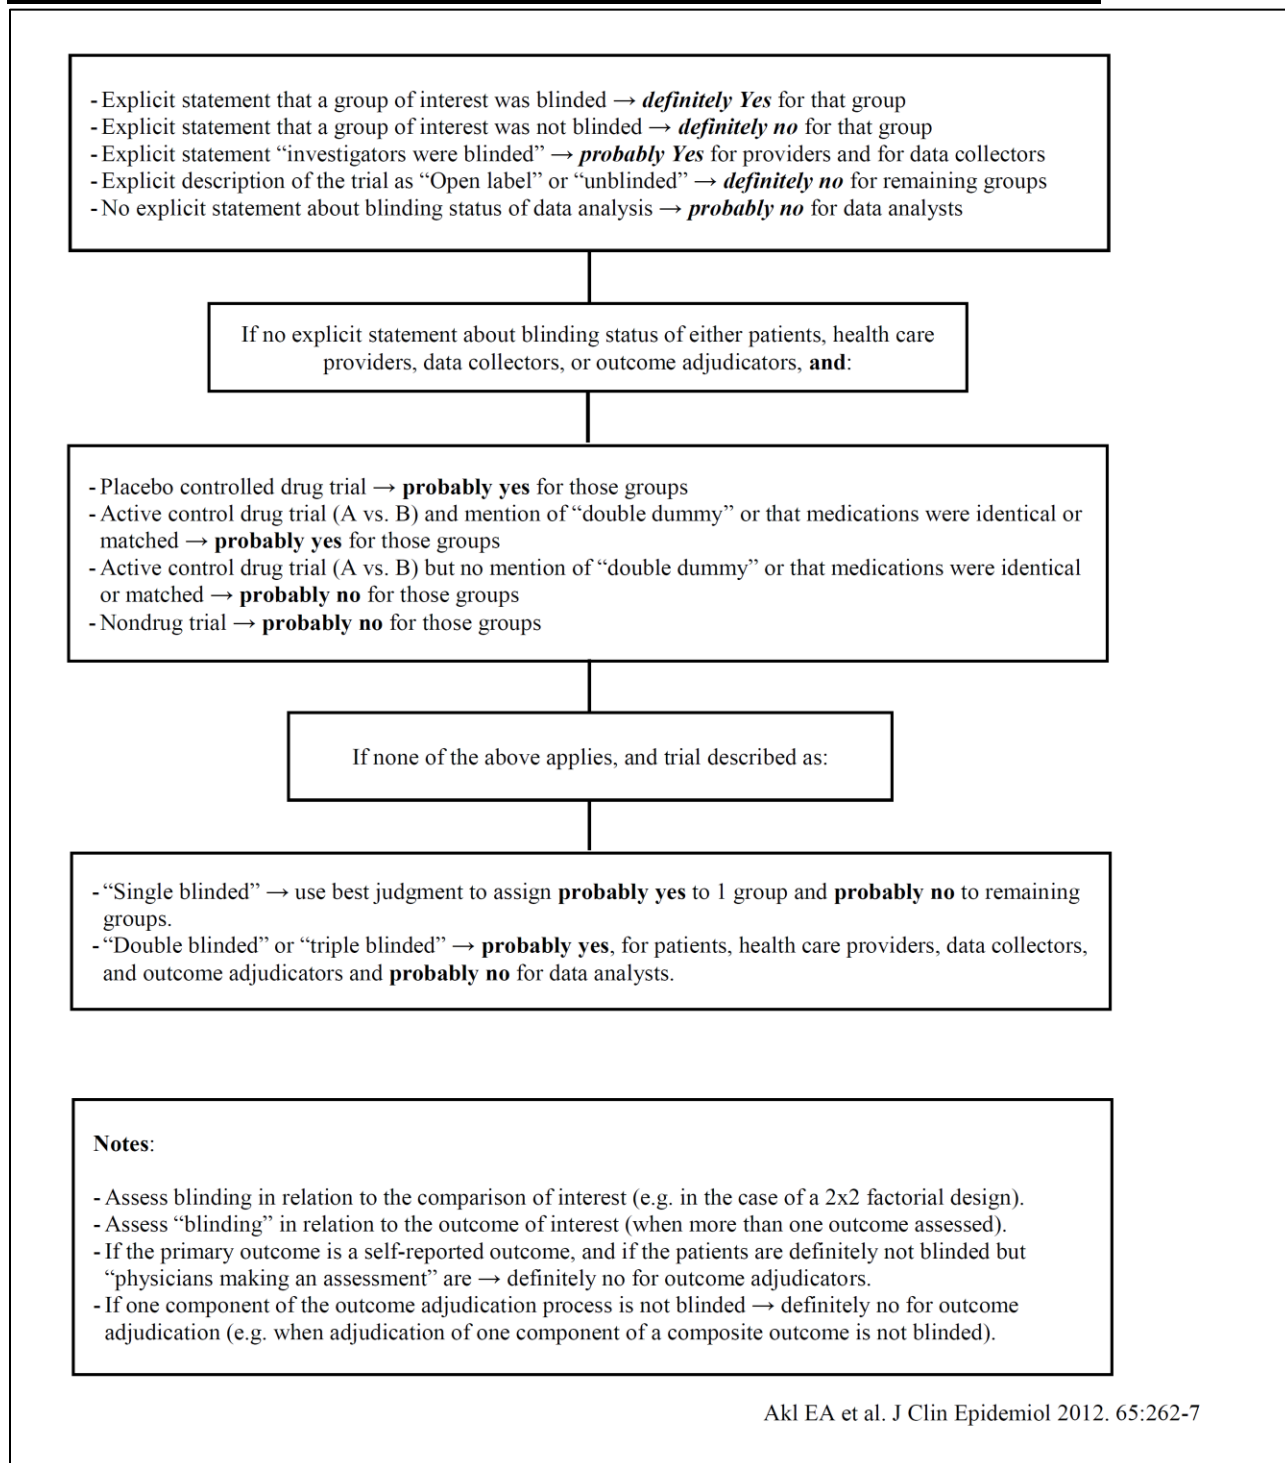

**eTable 3. LIST OF EXCLUDED STUDIES after full text screening**

| No. | Study Reference                                                                                                                                                                                                                                                                    | Reason for exclusion                              |
|-----|------------------------------------------------------------------------------------------------------------------------------------------------------------------------------------------------------------------------------------------------------------------------------------|---------------------------------------------------|
| 1   | Amoozgar H, Ghodstehrani M, Pishva N. Oral ibuprofen and ductus arteriosus closure in full-term neonates: A prospective case–control study. <i>Pediatr Cardiol.</i> 2010;1;31(1):40-3.                                                                                             | Not RCT                                           |
| 2   | Bravo MD, Cabañas F, Pérez-Fernández E, Quero J, Pellicer A. 212 Randomized Clinical Trial on Echocardiographically Guided (ECHOG) Versus Standard Ibuprofen Treatment (SIBT) for Patent Ductus Arteriosus (PDA): Pilot Study. <i>J Neonatal Perinatal Med.</i> 2011;4(3):287-288. | Duplicate (Conference abstract of included study) |
| 3   | Brecht M, Wiese M, Hopkins AM, Wojciechowski J, Suppiah V, Garg A, Garg S, Stark MJ, Andersen CC. Pharmacokinetics And Clinical Effects Of A Novel Dosing Regimen For Intravenous Ibuprofen—A Pilot Study. <i>J Paediatr Child Health.</i> 2015;51:97.                             | Not RCT                                           |
| 4   | Carmo KB, Evans N, Paradisis M. Duration of indomethacin treatment of the preterm patent ductus arteriosus as directed by echocardiography. <i>J Pediatr.</i> 2009;155(6):819-22.                                                                                                  | Not relevant intervention                         |
| 5   | Clyman RI, Roman C. The effects of caffeine on the preterm sheep ductus arteriosus. <i>Pediatr Res.</i> 2007;62(2):167-9.                                                                                                                                                          | Not RCT                                           |
| 6   | Dani C, Bertini G, Reali MF, Murru P, Fabris C, Vangi V, Rubaltelli FF. Prophylaxis of patent ductus arteriosus with ibuprofen in preterm infants. <i>Acta Paediatr.</i> 2000;89(11):1369-74.                                                                                      | Prophylactic use of Ibuprofen                     |
| 7   | Desfrere L, Zohar S, Morville P, Brunhes A, Chevret S, Pons G, Moriette G, Rey E, Treluyer JM. Dose-finding study of ibuprofen in patent ductus arteriosus using the continual reassessment method. <i>J Clin Pharm Ther.</i> 2005;30(2):121-32.                                   | Not RCT                                           |
| 8   | Eras Z, Gokmen T, Erdeve O, Ozyurt BM, Saridas B, Dilmen U. Impact of oral versus intravenous ibuprofen on neurodevelopmental outcome: a randomized controlled parallel study. <i>Am J Perinat.</i> 2013;30(10):857-62.                                                            | Duplicate (Secondary analysis of included study)  |
| 9   | Eras Z, Gokmen T, Erdeve O, Saridas B, Canpolat E, Dilmen U. 1244 Impact of Oral Versus Intravenous Ibuprofen on Neurodevelopmental Outcome: a Randomised Controlled Parallel Study. <i>Arch Dis Child.</i> 2012;97(Suppl 2):A355.                                                 | Duplicate (Conference abstract of included study) |
| 10  | Lai TH, Soong WJ, Hwang B. Indomethacin for the prevention of symptomatic patent ductus arteriosus in very low birth weight infants. <i>Zhonghua Min Guo Xiao Er Ke Yi Xue Hui Za Zhi.</i> 1990 Jan-Feb;31(1):17-23.                                                               | Prophylactic use of Indomethacin                  |
| 11  | Fajardo CA, Whyte RK, Steele BT. Effect of dopamine on failure of indomethacin to close the patent ductus arteriosus. <i>J Pediatr.</i> 1992;121(5):771-5.                                                                                                                         | Not relevant intervention                         |
| 12  | Gokmen T, Erdeve O, Altug N, Oguz SS, Uras N, Dilmen U. Efficacy and safety of oral versus intravenous ibuprofen in very-low-birth-weight preterms with patent ductus arteriosus. 2010;86:S38.                                                                                     | Duplicate (Conference abstract of included study) |
| 13  | Hammerman C, Aramburo MJ. Prolonged indomethacin therapy for the prevention of recurrences of patent ductus arteriosus. 1990. 117(5):771-776.                                                                                                                                      | Not relevant intervention                         |
| 14  | Jannatdoust A, Samadi M, Yeganehdoust S, et al. Effects of intravenous indomethacin on reduction of symptomatic patent ductus arteriosus cases and decreasing the need for prolonged mechanical ventilation. <i>J Cardiovasc Thorac Res.</i> 2014;6(4):257-259.                    | Prophylactic use of Indomethacin                  |
| 15  | Kluckow M, Evans N, Gill A, Jeffery M. Ductal echocardiographic targeting and early closure trial (DETECT): A pilot randomised controlled trial. 2012;48:43-44.                                                                                                                    | Duplicate (Conference abstract of included study) |
| 16  | Gimeno A, Modesto, V. Comparison of ibuprofen and indomethacin therapy for the treatment of patent ductus arteriosus. <i>Anales de Pediatria Continuada.</i> 2007;5(2):100-104.                                                                                                    | Not RCT                                           |
| 17  | Gournay V, Roze JC, Kuster A, et al. Prophylactic ibuprofen versus placebo in very premature infants: a randomised, double-blind, placebo-controlled trial. <i>Lancet.</i> 2004;364(9449):1939-44.                                                                                 | Prophylactic use of Ibuprofen                     |
| 18  | Hammerman C, Shchors I, Schimmel MS, Bromiker R, Kaplan M, Nir A. N-terminal-pro-B-type natriuretic peptide in premature patent ductus arteriosus: a physiologic biomarker, but is it a clinical tool? <i>Pediatr Cardiol.</i> 2010;31(1):62-5.                                    | Duplicate (Secondary analysis of included study)  |
| 19  | Mahony L, Carnero V, Brett C, Heymann MA, Clyman RI. Prophylactic indomethacin therapy for patent ductus arteriosus in very-low-birth-weight infants. <i>N Engl J Med.</i> 1982;306(9):506-10.                                                                                     | Prophylactic use of Indomethacin                  |

| <b>eTable 3. LIST OF EXCLUDED STUDIES after full text screening</b> |                                                                                                                                                                                                                                                                                       | <b>(continued)</b>                                 |
|---------------------------------------------------------------------|---------------------------------------------------------------------------------------------------------------------------------------------------------------------------------------------------------------------------------------------------------------------------------------|----------------------------------------------------|
| <b>No.</b>                                                          | <b>Study Reference</b>                                                                                                                                                                                                                                                                | <b>Reason for exclusion</b>                        |
| 20                                                                  | Mardoum R, Bejar R, Merritt TA, Berry C. Controlled study of the effects of indomethacin on cerebral blood flow velocities in newborn infants. <i>J Pediatr</i> . 1991;118(1):112-5.                                                                                                  | Not relevant outcome                               |
| 21                                                                  | Maruyama K, Fujiu T. Effects of prophylactic indomethacin on renal and intestinal blood flows in premature infants. <i>Pediatr Int</i> . 2012;54(4):480-5.                                                                                                                            | Prophylactic use of Indomethacin                   |
| 22                                                                  | Nestrud R, Hil D, Arrington, R. A double blind controlled study on the efficacy of indomethacin (Ind) in closure of patent ductus arteriosus (PDA) in premature infants. <i>Ped Res</i> . 1979;13(4, Part II):14.                                                                     | Duplicate (Conference abstract of included study)  |
| 23                                                                  | Van Overmeire B, Allegaert K, Casaer A, et al. Prophylactic ibuprofen in premature infants: a multicentre, randomised, double-blind, placebo-controlled trial. <i>Lancet</i> . 2004;364(9449):1945-9.                                                                                 | Prophylactic use of Ibuprofen                      |
| 24                                                                  | Schmidt B, Roberts RS, Fanaroff A, et al. TIPP Investigators. Indomethacin prophylaxis, patent ductus arteriosus, and the risk of bronchopulmonary dysplasia: further analyses from the Trial of Indomethacin Prophylaxis in Preterms (TIPP). <i>J Pediatr</i> . 2006;148(6):730-734. | Not RCT                                            |
| 25                                                                  | Supannachart S, Khowsathit P, Patchakapati B. Indomethacin prophylaxis for patent ductus arteriosus (PDA) in infants with a birth weight of less than 1250 grams. <i>J Med Assoc Thai</i> . 1999;82 Suppl 1:S87-92.                                                                   | Prophylactic use of Indomethacin                   |
| 26                                                                  | Valaes T, Moylan F, Cohn H. Incidence and significance of PDA in preterm infants (PTI) and controlled blind trial of indomethacin (IND). <i>Ped Res</i> . 1980;14(4, Part II):15.                                                                                                     | Not relevant population                            |
| 27                                                                  | Van Overmeire B. The use of ibuprofen in neonates in the treatment of patent ductus arteriosus. <i>Int J Clin Pract Suppl</i> . 2003;(135):23-7.                                                                                                                                      | Duplicate (Commentary on included study)           |
| 28                                                                  | Vargas-Origel A, Cruz-Anguiano V, López-Montaña E. [Indomethacin and furosemide in closure of ductus arteriosus]. <i>Bol Med Hosp Infant Mex</i> . 1986;43(8):482-8. [Spanish]                                                                                                        | Not relevant outcome                               |
| 29                                                                  | Yanowitz TD, Reese J, Gillam-Krakauer M, et al. Superior mesenteric artery blood flow velocities following medical treatment of a patent ductus arteriosus. <i>J Pediatr</i> . 2014;164(3):661-3.                                                                                     | Not relevant intervention/outcome                  |
| 30                                                                  | Yanowitz TD, Baker RW, Sobchak Brozanski B. Prophylactic indomethacin reduces grades III and IV intraventricular hemorrhages when compared to early indomethacin treatment of a patent ductus arteriosus. <i>J Perinatol</i> . 2003;23(4):317-22.                                     | Prophylactic use of Indomethacin                   |
| 31                                                                  | Yeh TF, Raval D, Lilien LD, Srinivasan G, Pildes RS. Decreased plasma glucose after indomethacin therapy in premature infants with patent ductus arteriosus. <i>Lancet</i> . 1982;2(8289):104-5.                                                                                      | Duplicate (Secondary analysis from included study) |
| 32                                                                  | Yeh TF, Thalji A, Luken, J. Intravenous indocin therapy in premature infants with PDA: A double-blind control study. <i>Ped Res</i> . 1979; 13(4, Part II):17.                                                                                                                        | Duplicate (Conference abstract of included study)  |
| 33                                                                  | Zanardo V, Trevisanuto D, Dani C, et al. "Silent" patent ductus arteriosus and bronchopulmonary dysplasia in low birth weight infants. <i>J Perinat Med</i> . 1995;23(6):493-9.                                                                                                       | Not RCT                                            |
| 34                                                                  | Peckham GJ, Miettinen OS, Ellison RC, et al. Clinical course to 1 year of age in premature infants with patent ductus arteriosus: results of a multicenter randomized trial of indomethacin. <i>J Pediatr</i> . 1984;105(2):285-91.                                                   | Duplicate (Secondary analysis from included study) |
| 35                                                                  | Prifti E, Enkeleda P, Rubena M, Alketa H. The impact of antenatal corticosteroids on PDA in low birth weight preterm infants. <i>J Perinatal Med</i> . 2013;41(s1)                                                                                                                    | Not relevant outcome                               |
| 36                                                                  | Weesner KM, Dillard RG, Boyle RJ, Block SM. Prophylactic treatment of asymptomatic patent ductus arteriosus in premature infants with respiratory distress syndrome. <i>South Med J</i> . 1987;Jun;80(6):706-8.                                                                       | Prophylactic use of Indomethacin                   |
| 37                                                                  | Yeh TF, Goldbarg HR, Henek T, Thalji A, Pildes RS. Intravenous indomethacin therapy in premature infants with patent ductus arteriosus. Causes of death and one-year follow-up. <i>Am J Dis Child</i> . 1982;136(9):803-7.                                                            | Duplicate (Secondary analysis from included study) |
| 38                                                                  | Yeh TF, Raval D, Pyati S, Pildes RS. Retinopathy of prematurity (ROP) and indomethacin therapy in premature infants with patent ductus arteriosus (PDA). <i>Prostaglandins</i> . 1983;25(3):385-91.                                                                                   | Not relevant outcome                               |
| 39                                                                  | Yeh TF, Thalji A, Luken L, Lilien L, Carr I, Pildes RS. Improved lung compliance following indomethacin therapy in premature infants with persistent ductus arteriosus. <i>Chest</i> . 1981;80(6):698-700.                                                                            | Duplicate (Secondary analysis from included study) |
| 40                                                                  | Satar M, Yapicioğlu H, Narli N, Ozbarlas N, Küçükosmanoğlu O, Tutak E. Is oral indomethacin effective in treatment of preterm infants with patent ductus arteriosus? <i>Turk J Pediatr</i> . 2004;46(2):137-41.                                                                       | Not RCT                                            |

| <b>eTable 3. LIST OF EXCLUDED STUDIES after full text screening</b> |                                                                                                                                                                                                                                                                               | <b>(continued)</b>                          |
|---------------------------------------------------------------------|-------------------------------------------------------------------------------------------------------------------------------------------------------------------------------------------------------------------------------------------------------------------------------|---------------------------------------------|
| <b>No.</b>                                                          | <b>Study Reference</b>                                                                                                                                                                                                                                                        | <b>Reason for exclusion</b>                 |
| 41                                                                  | Zanardo V, Vedovato S, Chiozza L, Faggian D, Favaro F, Trevisanuto D. Pharmacological closure of patent ductus arteriosus: effects on pulse pressure and on endothelin-1 and vasopressin excretion. <i>Am J Perinatol.</i> 2008;25(6):353-8.                                  | Not relevant outcome                        |
| 42                                                                  | Alipour MR, Mozaffari Shamsi M, Namayandeh SM, Pezeshkpour Z, Rezaeipour F, Sarebanhassanabadi M. The Effects of Oral Ibuprofen on Medicinal Closure of Patent Ductus Arteriosus in Full-Term Neonates in the Second Postnatal Week. <i>Iran J Pediatr.</i> 2016;26(4):e5807. | Not relevant population (full term infants) |
| 43                                                                  | Demir N, Peker E, Ece İ, Balahoroğlu R, Tuncer O. Efficacy and safety of rectal ibuprofen for patent ductus arteriosus closure in very low birth weight preterm infants. <i>J Matern Fetal Neonatal Med.</i> 2017;30(17):2119-2125.                                           | Not relevant intervention                   |
| 44                                                                  | Dorval VG, Martin B, Brassard M, Miro J, Chemtob S, Payot, A. The evolution of serum PGE2 during oral and intravenous ibuprofen treatment in preterm infants with patent ductus arteriosus (PDA). <i>Pediatr Child Health.</i> 2010;15:46A.                                   | Not relevant outcome                        |
| 45                                                                  | Knight D, Alkindi S, Buksh M, Kuschel C, Skinner, J. Placebo-controlled pilot trial of indomethacin in preterm infants with a patent ductus arteriosus. <i>J Pediatr Child Health.</i> 2011;47(s1):88                                                                         | Not relevant outcome                        |
| 46                                                                  | Hoxha A, Kola E, Kuneska N, Tushe E. Oral versus intravenous ibuprofen for the early closure of patent ductus arteriosus in low birth weight preterm infants. <i>European Medical, Health and Pharmaceutical Journal.</i> 2013;6.                                             | Duplicate publication                       |
| 47                                                                  | Akbari Asbagh P, Zarkesh MR, Nili F, Nayeri FS, Tofighi Naeem AT. Prophylactic treatment with oral paracetamol for patent ductus arteriosus in preterm infants: A randomized clinical trial. <i>Tehran U Med J.</i> 2015;73(2)86-92.                                          | Prophylactic use of acetaminophen           |
| 48                                                                  | Jasani B, Kabra N, Nanavati RN. Oral paracetamol in treatment of closure of patent ductus arteriosus in preterm neonates. <i>J Postgrad Med.</i> 2013;59(4):312-4.                                                                                                            | Not RCT                                     |
| 49                                                                  | Görk AS, Ehrenkranz RA, Bracken MB. Continuous infusion versus intermittent bolus doses of indomethacin for patent ductus arteriosus closure in symptomatic preterm infants. <i>Cochrane Database Syst Rev.</i> 2008 Jan 23;(1).                                              | Not RCT                                     |



**eTable 4. Clinical & Methodological Characteristics of Included Studies**

| eTable 4. Clinical & Methodological Characteristics of Included Studies |                              |                         |                       |                                                                                                         |                                                                                                                        |                                                                                                                                       |                                    |                                                                                                                                                                                                                                                                                                                                         |                                                                                                            |                                                                                  |
|-------------------------------------------------------------------------|------------------------------|-------------------------|-----------------------|---------------------------------------------------------------------------------------------------------|------------------------------------------------------------------------------------------------------------------------|---------------------------------------------------------------------------------------------------------------------------------------|------------------------------------|-----------------------------------------------------------------------------------------------------------------------------------------------------------------------------------------------------------------------------------------------------------------------------------------------------------------------------------------|------------------------------------------------------------------------------------------------------------|----------------------------------------------------------------------------------|
| Ref No                                                                  | Author & year of publication | Language of publication | # of infants enrolled | Gestational age at birth (in weeks)                                                                     | Birth weight (in grams)                                                                                                | Age at start of treatment (days) [Mean <sup>a</sup> (SD <sup>a</sup> )/ [Median <sup>b</sup> (IQR <sup>d</sup> /Range <sup>e</sup> )] | Overall assessment of risk of bias | Criteria for diagnosis of hs-PDA                                                                                                                                                                                                                                                                                                        | Intervention characteristics (drug: route & dose)                                                          |                                                                                  |
|                                                                         |                              |                         |                       | [Mean <sup>a</sup> (SD <sup>a</sup> )/ [Median <sup>b</sup> (IQR <sup>d</sup> /Range <sup>e</sup> )]    | [Mean <sup>a</sup> (SD <sup>a</sup> )/ [Median <sup>b</sup> (IQR <sup>d</sup> /Range <sup>e</sup> )]                   | [Mean <sup>a</sup> (SD <sup>a</sup> )/ [Median <sup>b</sup> (IQR <sup>d</sup> /Range <sup>e</sup> )]                                  |                                    |                                                                                                                                                                                                                                                                                                                                         |                                                                                                            |                                                                                  |
| 37                                                                      | Adamska 2005                 | Polish                  | 35                    | INDO 27.6 <sup>a</sup> (2) <sup>c</sup><br>IBU 27.7 <sup>a</sup> (1.8) <sup>c</sup>                     | INDO 1003 <sup>a</sup> (192) <sup>c</sup><br>IBU 1074 <sup>a</sup> (264) <sup>c</sup>                                  | NR                                                                                                                                    | Probably Low                       | PDA size >1.5mm; LA:AO ratio>1.3                                                                                                                                                                                                                                                                                                        | IV Indomethacin 0.2 mg/kg every 12 h x 3doses                                                              | IV Ibuprofen 10 mg/kg, followed by 5 mg/kg at 24 and 48 h                        |
| 38                                                                      | Akisu 2001                   | Turkish                 | 23                    | INDO 31.9 <sup>a</sup> (1.3) <sup>c</sup><br>IBU 32.1 <sup>a</sup> (1.2) <sup>c</sup>                   | INDO 1645 <sup>a</sup> (190) <sup>c</sup><br>IBU 1706 <sup>a</sup> (187) <sup>c</sup>                                  | INDO 3.5 <sup>a</sup> (0.6) <sup>c</sup><br>IBU 3.9 <sup>a</sup> (0.5) <sup>c</sup>                                                   | Probably High                      | Echo confirmed hs-PDA; criteria not specified                                                                                                                                                                                                                                                                                           | Oral Indomethacin 0.2 mg/kg every 12 h x 3doses                                                            | Oral Ibuprofen 10 mg/kg, followed by 5 mg/kg at 24 and 48 h                      |
| 39                                                                      | Aly 2007                     | English                 | 21                    | INDO 32.9 <sup>a</sup> (1.6) <sup>c</sup><br>IBU 31.2 <sup>a</sup> (2.5) <sup>c</sup>                   | INDO1884 <sup>a</sup> (485) <sup>c</sup><br>IBU 1521 <sup>a</sup> (398) <sup>c</sup>                                   | NR                                                                                                                                    | Probably Low                       | Shunting across PDA graded as mild, moderate, and severe according PDA diameter (<1.5, 1.5 to 2, and >2 mm, respectively); treatment criteria not specified                                                                                                                                                                             | Intravenous indomethacin (3 doses of IV indomethacin 0.2 mg/kg at 12-hour intervals)                       | Oral Ibuprofen (Initial dose of 10 mg/kg, followed by two doses of 5 mg/kg each) |
| 40                                                                      | Aranda 2009                  | English                 | 136                   | IBU 26.1 <sup>a</sup> (1.3) <sup>c</sup><br>PLAC 26.2 <sup>a</sup> (1.4) <sup>c</sup>                   | IBU 798.5 <sup>a</sup> (128.7) <sup>c</sup><br>PLAC 797.3 <sup>a</sup> (132.8) <sup>c</sup>                            | IBU 1.5 <sup>a</sup> (0.74) <sup>c</sup><br>PLAC 1.4 <sup>a</sup> (0.73) <sup>c</sup>                                                 | Low                                | PDA>1.5mm<br>LA/AO ratio of >1.4:1<br>LV/AO ratio of >2.1:1                                                                                                                                                                                                                                                                             | Intravenous Ibuprofen 10 mg/kg loading dose followed by 5 mg/kg/d on the 2nd and 3rd day)                  | Placebo                                                                          |
| 41                                                                      | Baenziger 1999               | English                 | 32                    | INDO 28 <sup>a</sup> (3.1) <sup>c</sup><br>INDO + dopamine 28.5 <sup>a</sup> (2.3) <sup>c</sup>         | INDO1220 <sup>a</sup> (305) <sup>c</sup><br>INDO + dopamine 1115 <sup>a</sup> (252) <sup>c</sup>                       | INDO 13 <sup>a</sup> (8.3) <sup>c</sup><br>INDO+ dopamine 11 <sup>a</sup> (7.56) <sup>c</sup>                                         | Probably High                      | Clinical signs of hs-PDA along with following echo criteria were: (A) Diastolic or systolic-diastolic reverse flow in the main pulmonary artery, PDA, or both, (B) reversed diastolic flow within the descending aorta below the PDA, (C) diastolic antegrade flow in the branches of the pulmonary arteries; (D) LA/AO ratio of >1.3:1 | IV Indomethacin 0.2 mg/kg/dose                                                                             | IV indomethacin 0.2 mg/kg/dose intravenously + Dopamine 4 mcg/kg/min             |
| 42                                                                      | Bagheri 2016                 | English                 | 129                   | IBU 31.7 <sup>a</sup> (2.2) <sup>c</sup><br>PARA 31.5 <sup>a</sup> (2.3) <sup>c</sup>                   | IBU 1642 <sup>a</sup> (58.5) <sup>c</sup><br>PARA 1646 (59.1) <sup>c</sup>                                             | IBU 3.4 <sup>a</sup> (2.1) <sup>c</sup><br>PARA 2.9 <sup>a</sup> (1.3) <sup>c</sup>                                                   | Probably Low                       | PDA>1.5 mm; LA:AO>1.2                                                                                                                                                                                                                                                                                                                   | Oral high dose Ibuprofen at 20 mg/kg followed by two 10 mg/kg doses at 24h interval                        | Oral acetaminophen 15 mg/kg every 6 h for 3 days                                 |
| 43                                                                      | Bagnoli 2013                 | English                 | 134                   | IBU 27.4 <sup>a</sup> (2.5) <sup>c</sup><br>PLAC 27.8 <sup>a</sup> (4) <sup>c</sup>                     | IBU 989 <sup>a</sup> (326) <sup>c</sup><br>PLAC 1197 <sup>a</sup> (835) <sup>c</sup>                                   | NR                                                                                                                                    | Probably High                      | LA/AO ratio of ≥1.4:1<br>LV/AO ratio of 2.1:1; and/or narrowest PDA diameter >1.5mm<br>Left-to-right shunting of blood and diastolic reversal of blood flow in the aorta.                                                                                                                                                               | IV Ibuprofen 10 mg/kg loading doses, followed by 5 mg/kg/d on the 2nd & 3rd day                            | Placebo                                                                          |
| 44                                                                      | Betkerur 1981                | English                 | 21                    | IND 31.1 <sup>a</sup> (0.6) <sup>c</sup><br>PLAC 29.6 <sup>a</sup> (0.7) <sup>c</sup>                   | INDO 1395.2 <sup>a</sup> (92.2) <sup>c</sup><br>PLAC 1134.3 <sup>a</sup> (150.3) <sup>c</sup>                          | INDO 7.4 <sup>a</sup> (0.6) <sup>c</sup><br>PLAC 11.9 <sup>a</sup> (2.6) <sup>c</sup>                                                 | Probably High                      | LA:AO ≥ 1.3                                                                                                                                                                                                                                                                                                                             | IV Indomethacin 0.3 mg/kg/dose                                                                             | Placebo (IV saline)                                                              |
| 45                                                                      | Cherif 2008                  | English                 | 64                    | IBU oral 29.3 <sup>a</sup> (1.2) <sup>c</sup><br>IBU IV 28.3 <sup>a</sup> (1.1) <sup>c</sup>            | IBU oral 1227.2 <sup>b</sup> (188) <sup>d</sup> (600-1470)<br>IBU IV 1197.7 <sup>b</sup> (158) <sup>d</sup> (630-1420) | NR                                                                                                                                    | Low                                | A left-to-right ductal shunting; LA:AO > 1.6                                                                                                                                                                                                                                                                                            | IV Ibuprofen 10 mg/kg, followed by 5 mg/kg at 24 and 48 h                                                  | Oral Ibuprofen 10 mg/kg, followed by 5 mg/kg at 24 and 48 h                      |
| 46                                                                      | Chotigeat 2003               | English                 | 30                    | INDO 29.86 <sup>a</sup> (2.92) <sup>c</sup><br>IBU 30.8 <sup>a</sup> (2.3) <sup>c</sup>                 | INDO 1434 <sup>a</sup> (421) <sup>c</sup><br>IBU 1412 <sup>a</sup> (354) <sup>c</sup>                                  | NR                                                                                                                                    | Probably High                      | 3 of 5 criteria that includes clinical signs and Doppler echo                                                                                                                                                                                                                                                                           | IV indomethacin (3 doses of IV indomethacin 0.2 mg/kg at 12-hour intervals)                                | Oral Ibuprofen 10 mg/kg, followed by 5 mg/kg at 24 and 48 h                      |
| 47                                                                      | Christmann 2002              | English                 | 32                    | INDO bolus 30.5 <sup>a</sup> (0.5) <sup>c</sup><br>INDO continuous 29.4 <sup>a</sup> (0.5) <sup>c</sup> | INDO bolus 1424 <sup>a</sup> (150) <sup>c</sup><br>INDO continuous 1150 <sup>a</sup> (77) <sup>c</sup>                 | NR                                                                                                                                    | Probably Low                       | Left to right PDA shunting on Doppler echo along with the following clinical criteria: Unexplained respiratory insufficiency and/or a persistent need of oxygen, bounding peripheral pulses and cardiac enlargement                                                                                                                     | IV Indomethacin (0.4mg/kg) (Initial dose was 0.2 mg/kg followed by two doses of 0.1 mg/kg at 12 and 36 h ) | IV Indomethacin 0.4 mg/kg continuous infusion                                    |
| 48                                                                      | Dang 2013                    | English                 | 160                   | IBU 30.9 <sup>a</sup> (2.2) <sup>c</sup><br>PARA 31.2 <sup>a</sup> (1.8) <sup>c</sup>                   | IBU 1531 <sup>a</sup> (453.5) <sup>c</sup><br>PARA 1591.9 <sup>a</sup> (348.6) <sup>c</sup>                            | NR                                                                                                                                    | Probably Low                       | Any one of the following:<br>1) LA:AO of ≥1.4 in the parasternal long-axis view<br>2) PDA diameter of ≥1.4 mm/kg body weight<br>3) left ventricular enlargement<br>4) Holodiastolic flow reversal in the descending aorta.                                                                                                              | Oral Ibuprofen 10 mg/kg followed by 5 mg/kg after 24 and 48 h                                              | Oral acetaminophen 15 mg/kg every 6 h for 3 days                                 |

**eTable 4. Clinical & Methodological Characteristics of Included Studies**

**(cont'd...)**

| Ref No | Author & year of publication | Language of publication | # of infants enrolled | Gestational age at birth (in weeks)                                                                        | Birth weight (in grams)                                                                                    | Age at start of treatment (days) [Mean <sup>a</sup> (SD <sup>c</sup> )/ [Median <sup>b</sup> (IQR <sup>d</sup> )/Range <sup>e</sup> ] | Overall assessment of risk of bias | Criteria for diagnosis of hs-PDA                                                                                                                         | Intervention characteristics (drug: route & dose)                                                                                                                                                                                                                                                                                                                                                   |                                                                                          |
|--------|------------------------------|-------------------------|-----------------------|------------------------------------------------------------------------------------------------------------|------------------------------------------------------------------------------------------------------------|---------------------------------------------------------------------------------------------------------------------------------------|------------------------------------|----------------------------------------------------------------------------------------------------------------------------------------------------------|-----------------------------------------------------------------------------------------------------------------------------------------------------------------------------------------------------------------------------------------------------------------------------------------------------------------------------------------------------------------------------------------------------|------------------------------------------------------------------------------------------|
|        |                              |                         |                       | [Mean <sup>a</sup> (SD <sup>c</sup> )/ [Median <sup>b</sup> (IQR <sup>d</sup> )/Range <sup>e</sup> ]       | [Mean <sup>a</sup> (SD <sup>c</sup> )/ [Median <sup>b</sup> (IQR <sup>d</sup> )/Range <sup>e</sup> ]       |                                                                                                                                       |                                    |                                                                                                                                                          |                                                                                                                                                                                                                                                                                                                                                                                                     |                                                                                          |
| 49     | Dani 2012                    | English                 | 70                    | IBU standard dose 26 <sup>a</sup> (1.7) <sup>c</sup><br>IBU high dose 25.6 <sup>a</sup> (1.8) <sup>c</sup> | IBU standard dose 835 <sup>a</sup> (215) <sup>c</sup><br>IBU high dose 781 <sup>a</sup> (225) <sup>c</sup> | NR                                                                                                                                    | Low                                | Echocardiographic demonstration of a ductal left-to-right shunt, with a LA:AO >1.3 or a PDA >1.5 mm                                                      | IV Ibuprofen 20 mg/kg, followed by two doses of 10 mg/kg each, after 24 and 48h                                                                                                                                                                                                                                                                                                                     | IV Ibuprofen initial dose of 10 mg/kg followed by two doses of 5 mg/kg at 24-h intervals |
| 50     | Dash 2015                    | English                 | 73                    | PARA 28.5 <sup>a</sup> (2.7) <sup>c</sup><br>INDO 28.9 <sup>a</sup> (2.6) <sup>c</sup>                     | PARA 989 <sup>a</sup> (299) <sup>c</sup><br>INDO 1027 <sup>a</sup> (262) <sup>c</sup>                      | NR                                                                                                                                    | Low                                | PDA size ≥1.5 mm; Left to right PDA shunt<br>LA:AO ratio > 1.5:1.                                                                                        | IV Indomethacin 0.2 mg/kg/dose once daily for 3 days                                                                                                                                                                                                                                                                                                                                                | Oral Acetaminophen 15 mg/kg/dose four times daily for 7 days (28 doses)                  |
| 51     | Ding 2014                    | English                 | 72                    | 30.24 <sup>a</sup> (1.49) <sup>c</sup>                                                                     | 1468.64 <sup>a</sup> (447.62) <sup>c</sup>                                                                 | NR                                                                                                                                    | Probably High                      | Echo confirmed hs-PDA; criteria not specified                                                                                                            | Oral Ibuprofen 10 mg/kg, followed by 5 mg/kg after 24 and 48 h.                                                                                                                                                                                                                                                                                                                                     | Placebo (Oral 5% glucose)                                                                |
| 52     | Erdeve 2012                  | English                 | 70                    | IBU oral 26.4 <sup>a</sup> (1.1) <sup>c</sup><br>IBU IV 26.3 <sup>a</sup> (1.3) <sup>c</sup>               | IBU oral 892 <sup>a</sup> (117) <sup>c</sup><br>IBU IV 872 <sup>a</sup> (123) <sup>c</sup>                 | NR                                                                                                                                    | Low                                | PDA >1.5 mm;<br>LA:AO >1.5;<br>Left-to-right shunting of blood;<br>End-diastolic reversal of blood flow in the aorta or poor cardiac function            | IV Ibuprofen 10 mg/kg, followed by 5 mg/kg at 24 and 48 h                                                                                                                                                                                                                                                                                                                                           | Oral Ibuprofen 10 mg/kg, followed by 5 mg/kg at 24 and 48 h                              |
| 53     | Fakhræe 2007                 | English                 | 36                    | INDO 30.9 <sup>a</sup> (2) <sup>c</sup><br>IBU 31.5 <sup>a</sup> (1.4) <sup>c</sup>                        | INDO 1522.1 <sup>a</sup> (357.7) <sup>c</sup><br>IBU 1658.3 <sup>a</sup> (386.6) <sup>c</sup>              | NR                                                                                                                                    | Probably High                      | Left to right shunt; PDA > 1.5 mm;<br>LA:AO >1.6; severe diastolic backflow in the pulmonary trunk and in the aorta                                      | Oral Indomethacin; 3 doses of 0.2 mg/kg at 24 hour intervals                                                                                                                                                                                                                                                                                                                                        | Oral Ibuprofen 10 mg/kg, followed by 5 mg/kg at 24 and 48 h                              |
| 54     | Fesharaki 2012               | Persian                 | 60                    | IBU high dose 29.77 <sup>a</sup><br>IBU standard dose 30.88 <sup>a</sup>                                   | IBU high dose 1300.2 <sup>a</sup><br>IBU standard dose 1324.3 <sup>a</sup>                                 | NR                                                                                                                                    | Probably Low                       | Echo confirmed hs-PDA; criteria not specified                                                                                                            | Oral high dose Ibuprofen at 15 mg/kg followed by two 7.5 mg/kg doses at 24h interval                                                                                                                                                                                                                                                                                                                | Oral Ibuprofen 10 mg/kg followed by 5 mg/kg after 24 and 48 h                            |
| 55     | Gersony 1983                 | English                 | 405                   | NR                                                                                                         | NR                                                                                                         | NR                                                                                                                                    | Low                                | Clinical signs of hs-PDA & LA:AO >1.15 on echocardiography                                                                                               | IV Indomethacin 3 doses; 1st 0.2mg/kg; Infants less than 48 hours of age at the time of trial entry received 0.1 mg/kg body weight for the second and third doses of the drug. Infants who were 2-7 days of age at the time of the first dose received 0.2 mg/kg for the second and third doses, and those infants 8 days or older received 0.25 mg/kg body weight for their second and third doses | Placebo (IV colorless solution)                                                          |
| 56     | Ghanem 2010                  | English                 | 66                    | IBU 28.8 <sup>a</sup> (2.8) <sup>c</sup><br>PLAC 28.9 <sup>a</sup> (2.7) <sup>c</sup>                      | IBU 1035 <sup>a</sup> (353) <sup>c</sup><br>PLAC 1047 <sup>a</sup> (403) <sup>c</sup>                      | NR                                                                                                                                    | Probably High                      | LA:AO >1.4 or PDA >1.5 mm                                                                                                                                | Oral Ibuprofen 10 mg/kg, followed by 5 mg/kg at 24 and 48 h                                                                                                                                                                                                                                                                                                                                         | Placebo                                                                                  |
| 57     | Gimeno Navarro 2005          | Spanish                 | 47                    | INDO 28.5 <sup>b</sup> (27-30) <sup>d</sup><br>IBU 28 <sup>b</sup> (24-31) <sup>d</sup>                    | INDO 1205.8 <sup>a</sup> (512.9) <sup>c</sup><br>IBU 1169 <sup>a</sup> (489.5) <sup>c</sup>                | NR                                                                                                                                    | Probably Low                       | PDA/Pulmonary root ratio >0.3;<br>Diastolic reverse flow in the abdominal aorta                                                                          | IV Indomethacin 0.2 mg/kg every 12 h x 3doses                                                                                                                                                                                                                                                                                                                                                       | IV Ibuprofen 10 mg/kg, followed by 5 mg/kg at 24 and 48 h                                |
| 58     | Gokmen 2011                  | English                 | 102                   | IBU oral 28.5 <sup>a</sup> (1.9) <sup>c</sup><br>IBU IV 28.7 <sup>a</sup> (2.1) <sup>c</sup>               | IBU oral 1170 <sup>a</sup> (297) <sup>c</sup><br>IBU IV 1205 <sup>a</sup> (366) <sup>c</sup>               | NR                                                                                                                                    | Low                                | PDA >1.5 mm;<br>LA:AO >1.5;<br>Left-to-right shunting of blood across PDA;<br>End-diastolic reversal of blood flow in the aorta or poor cardiac function | IV Ibuprofen 10 mg/kg, followed by 5 mg/kg at 24 and 48 h                                                                                                                                                                                                                                                                                                                                           | Oral Ibuprofen 10 mg/kg, followed by 5 mg/kg at 24 and 48 h                              |

**eTable 4. Clinical & Methodological Characteristics of Included Studies (cont'd...)**

| Ref No | Author & year of publication | Language of publication | # of infants enrolled | Gestational age at birth (in weeks)                                                                       | Birth weight (in grams)                                                                                         | Age at start of treatment (days) [Mean <sup>a</sup> (SD <sup>c</sup> )/ [Median <sup>b</sup> (IQR <sup>d</sup> )/Range <sup>e</sup> ] | Overall assessment of risk of bias | Criteria for diagnosis of hs-PDA                                                                                                                                                                                                                                                                                                                                                                                                                                                                                                                                                                                                                  | Intervention characteristics (drug: route & dose)                                                                                                                                                    |                                                                                                                                                                                                     |
|--------|------------------------------|-------------------------|-----------------------|-----------------------------------------------------------------------------------------------------------|-----------------------------------------------------------------------------------------------------------------|---------------------------------------------------------------------------------------------------------------------------------------|------------------------------------|---------------------------------------------------------------------------------------------------------------------------------------------------------------------------------------------------------------------------------------------------------------------------------------------------------------------------------------------------------------------------------------------------------------------------------------------------------------------------------------------------------------------------------------------------------------------------------------------------------------------------------------------------|------------------------------------------------------------------------------------------------------------------------------------------------------------------------------------------------------|-----------------------------------------------------------------------------------------------------------------------------------------------------------------------------------------------------|
|        |                              |                         |                       | [Mean <sup>a</sup> (SD <sup>c</sup> )/ [Median <sup>b</sup> (IQR <sup>d</sup> )/Range <sup>e</sup> ]      | [Mean <sup>a</sup> (SD <sup>c</sup> )/ [Median <sup>b</sup> (IQR <sup>d</sup> )/Range <sup>e</sup> ]            |                                                                                                                                       |                                    |                                                                                                                                                                                                                                                                                                                                                                                                                                                                                                                                                                                                                                                   |                                                                                                                                                                                                      |                                                                                                                                                                                                     |
| 59     | Hammerman 1990               | English                 | 39                    | INDO 28 <sup>a</sup> (3) <sup>c</sup><br>PLAC 27 <sup>a</sup> (7) <sup>c</sup>                            | INDO 1099 <sup>a</sup> (435) <sup>c</sup><br>PLAC 1040 <sup>a</sup> (394) <sup>c</sup>                          | INDO 9 <sup>a</sup> (4) <sup>c</sup><br>PLAC 10 <sup>a</sup> (5) <sup>c</sup>                                                         | Probably Low                       | The presence of an infraclavicular and precordial systolic murmur consistent with PDA, plus any two of the following: bounding pulse rate, diastolic pressure of $\leq 25$ mm Hg, and pulmonary plethora or cardiomegaly on chest radiographs. The clinical diagnosis was confirmed by pulsed Doppler echocardiography; echo criteria not specified                                                                                                                                                                                                                                                                                               | IV Indomethacin (3 initial doses, 0.2 mg/kg/dose every 12 hours followed by 5 more doses 0.2 mg/kg/dose every 24 hours)                                                                              | Placebo (IV saline)                                                                                                                                                                                 |
| 60     | Hammerman 1995               | English                 | 18                    | INDO bolus 29 <sup>a</sup> (2) <sup>c</sup><br>INDO continuous 28 <sup>a</sup> (2) <sup>c</sup>           | INDO bolus 1200 <sup>a</sup> (0.3) <sup>c</sup><br>INDO continuous 1100 <sup>a</sup> (0.2) <sup>c</sup>         | NR                                                                                                                                    | Probably Low                       | Measurements of maximal systolic pressure gradient and % filling of the pulmonary artery were recorded as reflections of severity of ductal shunting                                                                                                                                                                                                                                                                                                                                                                                                                                                                                              | IV Indomethacin 0.2 mg/kg by a 1-minute rapid injection for the first dose and then 0.1 mg/kg again by rapid injection, every 12 hours for two additional doses (total indomethacin dose 400 mcg/kg) | IV Indomethacin infusion at 11 mcg/kg/hour to run for 36 hours (total dose 396 mcg/kg)                                                                                                              |
| 61     | Hammerman 2008               | English                 | 63                    | INDO continuous 27.8 <sup>a</sup> (2.8) <sup>c</sup><br>IBU IV 27.8 <sup>a</sup> (2.6) <sup>c</sup>       | INDO continuous 1100 <sup>a</sup> (0.45) <sup>c</sup><br>IBU IV 1060 <sup>a</sup> (0.35) <sup>c</sup>           | INDO continuous 4.5 <sup>b</sup> (2.3-7.7) <sup>d</sup><br>IBU IV 3.7 <sup>b</sup> (2.5-5.5) <sup>d</sup>                             | Low                                | Left to right PDA shunting on Doppler echo                                                                                                                                                                                                                                                                                                                                                                                                                                                                                                                                                                                                        | IV Indomethacin infused continuously for 36 h at a rate of 17 mcg/kg/h                                                                                                                               | IV Ibuprofen initial dose of 10 mg/kg followed by two doses of 5 mg/kg at 24-h intervals                                                                                                            |
| 62     | Jegatheesan 2008             | English                 | 105                   | INDO low dose 25.8 <sup>a</sup> (1.2) <sup>c</sup><br>INDO high dose 25.5 <sup>a</sup> (1.2) <sup>c</sup> | INDO low dose 816 <sup>a</sup> (177) <sup>c</sup><br>INDO high dose 791 <sup>a</sup> (158) <sup>c</sup>         | NR                                                                                                                                    | Probably High                      | Hs-PDA on echo; criteria not specified                                                                                                                                                                                                                                                                                                                                                                                                                                                                                                                                                                                                            | IV Indomethacin 0.1mg/Kg/d x 3d                                                                                                                                                                      | IV Indomethacin 0.2-0.5mg/Kg/d x3d                                                                                                                                                                  |
| 63     | Kluckow 2014                 | English                 | 92                    | INDO 26 <sup>a</sup> (1.4) <sup>c</sup><br>PLAC 26 <sup>a</sup> (1.4) <sup>c</sup>                        | INDO 892 <sup>a</sup> (205) <sup>c</sup><br>PLAC 876 <sup>a</sup> (203) <sup>c</sup>                            | INDO 0.34 <sup>a</sup> (0.12) <sup>c</sup><br>PLAC 0.37 <sup>a</sup> (0.14) <sup>c</sup>                                              | Low                                | The PDA diameters used were >1.8 mm at postnatal age 3-5 h, >1.6 mm at post-natal age 6-8 h and >1.3 mm at postnatal age 9-12h                                                                                                                                                                                                                                                                                                                                                                                                                                                                                                                    | IV Indomethacin 0.2 mg/kg followed by 0.1 mg/kg                                                                                                                                                      | Placebo                                                                                                                                                                                             |
| 64     | Krauss 1989                  | English                 | 27                    | NR                                                                                                        | INDO 1183 <sup>a</sup> (266) <sup>c</sup><br>No treatment 1022 <sup>a</sup> (224) <sup>c</sup>                  | NR                                                                                                                                    | Probably High                      | Clinical signs of PDA along with PDA diameter and LA:AO ratio on echocardiography; criteria not specified                                                                                                                                                                                                                                                                                                                                                                                                                                                                                                                                         | 3 doses of IV Indomethacin 0.2 mg/kg/dose between 72-96 h of age                                                                                                                                     | No treatment                                                                                                                                                                                        |
| 65     | Lago 2002                    | English                 | 175                   | INDO 29 <sup>a</sup> (3) <sup>c</sup><br>IBU 28 <sup>a</sup> (2) <sup>c</sup>                             | INDO 1214 <sup>a</sup> (427) <sup>c</sup><br>IBU 1126 <sup>a</sup> (412) <sup>c</sup>                           | NR                                                                                                                                    | Probably High                      | Typical PDA flow pattern obtained by colour Doppler echocardiography. Shunting was defined as haemodynamically significant if a disturbed diastolic flow was easily detectable in the main pulmonary artery with a diastolic backflow in the aorta immediately below the ductus arteriosus and a forward flow above the ductal insertion                                                                                                                                                                                                                                                                                                          | IV Indomethacin 3 doses of 0.2 mg/kg at 12 h intervals                                                                                                                                               | IV Ibuprofen initial dose of 10 mg/kg followed by two doses of 5 mg/kg each after 24 and 48h                                                                                                        |
| 66     | Lago 2014                    | English                 | 111                   | INDO bolus 27.4 <sup>a</sup> (2.7) <sup>c</sup><br>INDO continuous 27.3 <sup>a</sup> (2.1) <sup>c</sup>   | INDO bolus 1027.1 <sup>a</sup> (346.1) <sup>c</sup><br>INDO continuous 1012.1 <sup>a</sup> (315.4) <sup>c</sup> | INDO bolus 3.3 <sup>a</sup> (1) <sup>c</sup><br>INDO continuous 2.7 <sup>a</sup> (0.7) <sup>c</sup>                                   | Low                                | Shunting was hemodynamically significant if 2 or more of the following conditions were met: (1) transductal PDA diameter > 1.4 mm/kg; (2) unrestrictive pulsatile transductal flow [PDA maximum velocity (Vmax) <2.0 m/s]; (3) mild-to-moderate left heart volume loading [LA/Ao ratio >1.4]; (4) increased pulmonary perfusion, i.e. mean and end-diastolic flow velocity in the left pulmonary artery $\geq 0.42$ and $\geq 0.20$ m/s, respectively, and (5) increased left ventricular output and consistent peripheral hypoperfusion in the superior vena cava, i.e. left ventricular output/superior vena cava (LVO/SVC) flow ratio $\geq 4$ | IV Ibuprofen bolus (Daily continuous infusions of 5% dextrose and IBU boluses of 10, 5 and 5 mg/kg administered over 15 min, 24h apart)                                                              | IV Ibuprofen continuous infusions of 10mg/kg (0.416 mg/kg/h), 5 mg/kg (0.208 mg/kg/h) and 5 mg/kg (0.208 mg/kg/h), and boluses of equal volumes of 5% dextrose administered over 15 min, 24 h apart |
| 67     | Lee 2003                     | English                 | 140                   | 27.4 <sup>a</sup> (2.7) <sup>c</sup>                                                                      | 955 <sup>a</sup> (264) <sup>c</sup>                                                                             | 2.2 <sup>b</sup> (1.58-3.08) <sup>d</sup>                                                                                             | Low                                | Clinical criteria (murmur, hyperactive precordium, hypotension, apnea, high FiO <sub>2</sub> along with PDA: >1.5mm on echo                                                                                                                                                                                                                                                                                                                                                                                                                                                                                                                       | IV Indomethacin 0.1mg/Kg every 12h x 3doses infused over 30 mins                                                                                                                                     | IV Indomethacin 0.1 mg/kg every 24 h x 6 doses infused over 30 min                                                                                                                                  |
| 68     | Lee 2008                     | Korean                  | 34                    | INDO 29.4 <sup>a</sup> (2.6) <sup>c</sup><br>IBU 30.2 <sup>a</sup> (3.0) <sup>c</sup>                     | INDO 1290 <sup>a</sup> (360) <sup>c</sup><br>IBU 1480 <sup>a</sup> (560) <sup>c</sup>                           | INDO 3.9 <sup>a</sup> (1.8) <sup>c</sup><br>IBU 3.9 <sup>a</sup> (1.4) <sup>c</sup>                                                   | Probably Low                       | PDA >1.5mm; LA:AO >1.3                                                                                                                                                                                                                                                                                                                                                                                                                                                                                                                                                                                                                            | IV Indomethacin 0.2 mg/kg every 12 h x 3doses                                                                                                                                                        | Oral Ibuprofen 10 mg/kg, followed by 5 mg/kg at 24 and 48 h                                                                                                                                         |

**eTable 4. Clinical & Methodological Characteristics of Included Studies**

(cont'd...)

| Ref No | Author & year of publication | Language of publication | # of infants enrolled | Gestational age at birth (in weeks)                                                                  | Birth weight (in grams)                                                                              | Age at start of treatment (days) [Mean <sup>a</sup> (SD <sup>c</sup> )/ [Median <sup>b</sup> (IQR <sup>d</sup> )/Range <sup>e</sup> ] | Overall assessment of risk of bias | Criteria for diagnosis of hs-PDA                                                                                                                                                                                                                                                                                                                 | Intervention characteristics (drug: route & dose)                                                                                                         |                                                                                               |
|--------|------------------------------|-------------------------|-----------------------|------------------------------------------------------------------------------------------------------|------------------------------------------------------------------------------------------------------|---------------------------------------------------------------------------------------------------------------------------------------|------------------------------------|--------------------------------------------------------------------------------------------------------------------------------------------------------------------------------------------------------------------------------------------------------------------------------------------------------------------------------------------------|-----------------------------------------------------------------------------------------------------------------------------------------------------------|-----------------------------------------------------------------------------------------------|
|        |                              |                         |                       | [Mean <sup>a</sup> (SD <sup>c</sup> )/ [Median <sup>b</sup> (IQR <sup>d</sup> )/Range <sup>e</sup> ] | [Mean <sup>a</sup> (SD <sup>c</sup> )/ [Median <sup>b</sup> (IQR <sup>d</sup> )/Range <sup>e</sup> ] |                                                                                                                                       |                                    |                                                                                                                                                                                                                                                                                                                                                  |                                                                                                                                                           |                                                                                               |
| 69     | Lin 2017                     | English                 | 144                   | INDO 26.3 <sup>a</sup> (1.6) <sup>c</sup><br>IBU 26.2 <sup>a</sup> (1.7) <sup>c</sup>                | INDO 812 <sup>a</sup> (160) <sup>c</sup><br>IBU 801 <sup>a</sup> (156) <sup>c</sup>                  | INDO 3.3 <sup>a</sup> (1.4) <sup>c</sup><br>IBU 3.2 <sup>a</sup> (2) <sup>c</sup>                                                     | Low                                | Cardiovascular dysfunction score>3 & LA:AO > 1.3                                                                                                                                                                                                                                                                                                 | IV Indomethacin 0.2 mg/kg followed by 0.1 mg/kg q 24h x 2 doses                                                                                           | IV Ibuprofen: Initial dose of 10 mg/kg, followed by two doses of 5 mg/kg each at 24h interval |
| 70     | Lin 2012                     | Chinese                 | 64                    | IBU 31.2 <sup>a</sup> (2.4) <sup>c</sup><br>PLAC 30.8 <sup>a</sup> (2.3) <sup>c</sup>                | IBU 1301 <sup>a</sup> (260) <sup>c</sup><br>PLAC 1350 <sup>a</sup> (221) <sup>c</sup>                | IBU 23 <sup>a</sup> (4) <sup>c</sup><br>PLAC 20 <sup>a</sup> (5) <sup>c</sup>                                                         | Probably Low                       | Clinical signs of hs-PDA along with following echo criteria: PDA ≥1.5mm & Left-right PDA shunt                                                                                                                                                                                                                                                   | Oral Ibuprofen 10 mg/kg followed by 5 mg/kg after 24 and 48 h                                                                                             | Placebo (Oral saline)                                                                         |
| 71     | Merrit 1981                  | English                 | 24                    | NR                                                                                                   | NR<br>NR                                                                                             | NR                                                                                                                                    | High                               | Clinical signs of hs-PDA along with LA:AO >1.2 on echo                                                                                                                                                                                                                                                                                           | IV Indomethacin 0.2 mg/kg every 24h x 3days                                                                                                               | No treatment                                                                                  |
| 72     | Monset-Couchard 1983         | French                  | 24                    | INDO 30.6 <sup>a</sup> (NR)<br>No treatment 30.6 <sup>a</sup> (NR)                                   | INDO 1434 <sup>a</sup> (361) <sup>c</sup><br>No treatment 1398 <sup>a</sup> (471)                    | NR                                                                                                                                    | High                               | Clinical signs of hs-PDA & increased LA:AO on echo                                                                                                                                                                                                                                                                                               | IV Indomethacin 0.2 mg/kg single dose                                                                                                                     | No treatment                                                                                  |
| 73     | Mosca 1997                   | English                 | 16                    | INDO 28 <sup>b</sup> (25-30) <sup>c</sup><br>IBU 29 <sup>b</sup> (27-31) <sup>c</sup>                | INDO 820 <sup>b</sup> (600-1390) <sup>c</sup><br>IBU 855 <sup>b</sup> (620-1620) <sup>c</sup>        | NR                                                                                                                                    | Probably High                      | Mechanically ventilated for RDS & LA:AO >1.4 on echo                                                                                                                                                                                                                                                                                             | IV Indomethacin 0.2 mg/kg every 24h x 3days                                                                                                               | IV Ibuprofen 10mg/kg every 24h x 3days                                                        |
| 74     | Mullett 1982                 | English                 | 47                    | PLAC 29.5 <sup>a</sup> (NR)<br>INDO 30.1 <sup>a</sup> (NR)                                           | PLAC 1212 <sup>a</sup> (NR)<br>INDO 1237 <sup>a</sup> (NR)                                           | PLAC 7.5 <sup>a</sup><br>INDO 7.4 <sup>a</sup>                                                                                        | Probably Low                       | Enrolment criterion: Heart murmur consistent with PDA<br>PDA closure criteria: complete cessation of the PDA murmur or a decrease in intensity by II of VI grades, resting heart rate of less than 145 beats per minute, improvement in respiratory status (removal from assistance or 30% decrease in FiO2), and LA/AO ratio of > 1.2:1 on echo | Oral Indomethacin 0.2 mg/kg every 24h x 2days                                                                                                             | Placebo (Oral cornstarch)                                                                     |
| 75     | Nestrud 1980                 | English                 | 23                    | INDO 30.8 <sup>a</sup> (1.8) <sup>c</sup><br>PLAC 28.1 <sup>a</sup> (2.0) <sup>c</sup>               | INDO 1287 <sup>a</sup> (325) <sup>c</sup><br>PLAC 1189 <sup>a</sup> (376) <sup>c</sup>               | INDO 20.1 <sup>a</sup> (16.7) <sup>c</sup><br>PLAC 14.4 <sup>a</sup> (10) <sup>c</sup>                                                | Low                                | Presence of a large left-right shunt on echo; LA:AO<1.3 did not exclude patient from the study if there was overwhelming clinical signs of congestive cardiac failure                                                                                                                                                                            | Oral Indomethacin 0.2 mg/kg every 12h x 3 doses                                                                                                           | Placebo (Oral saline)                                                                         |
| 76     | Neu 1981                     | English                 | 21                    | 29.3 <sup>a</sup> (0.6) <sup>c</sup>                                                                 | 1142 <sup>a</sup> (80) <sup>c</sup>                                                                  | NR                                                                                                                                    | Low                                | Clinical signs of hs-PDA and increased LA:AO ratio on echo; cut-off not specified                                                                                                                                                                                                                                                                | Oral Indomethacin 0.25mg/kg every 24h x 2doses                                                                                                            | Placebo                                                                                       |
| 77     | Oncel 2014                   | English                 | 80                    | IBU 27.3 <sup>a</sup> (2.1) <sup>c</sup><br>PARA 27.3 <sup>a</sup> (1.7) <sup>c</sup>                | IBU 973 <sup>a</sup> (224) <sup>c</sup><br>PARA 931 <sup>a</sup> (217) <sup>c</sup>                  | NR                                                                                                                                    | Probably Low                       | PDA >1.5 mm, LA:AO >1.5, end diastolic reversal of blood flow in the aorta, or poor cardiac function in addition to clinical signs of PDA.                                                                                                                                                                                                       | Oral Ibuprofen 10 mg/kg followed by 5 mg/kg after 24 and 48 h                                                                                             | Oral acetaminophen 15 mg/kg every 6 h for 3 days                                              |
| 78     | Osborn 2003                  | English                 | 70                    | PLAC 26.9 <sup>a</sup> (1.8) <sup>c</sup><br>INDO 26.7 <sup>a</sup> (1.6) <sup>c</sup>               | PLAC 1002 <sup>a</sup> (288) <sup>c</sup><br>INDO 958 <sup>a</sup> (237.2) <sup>c</sup>              | 4.3 <sup>b</sup> (2-12) <sup>c</sup>                                                                                                  | Probably Low                       | PDA>1.6mm                                                                                                                                                                                                                                                                                                                                        | IV Indomethacin 0.2mg/kg single dose                                                                                                                      | Placebo                                                                                       |
| 79     | Patel 2000                   | English                 | 33                    | INDO 26.7 <sup>b</sup> (23.2-30) <sup>c</sup><br>IBU 26.0 <sup>b</sup> (23.9-35.0) <sup>c</sup>      | INDO 838 <sup>b</sup> (458-1377) <sup>c</sup><br>IBU 790 <sup>b</sup> (620-2780) <sup>c</sup>        | INDO 7 <sup>b</sup> (3-21) <sup>c</sup><br>IBU 8 <sup>b</sup> (3-20) <sup>c</sup>                                                     | Probably Low                       | Clinical signs of hs-PDA & left-right PDA shunt on echo                                                                                                                                                                                                                                                                                          | IV Indomethacin 0.2 mg/kg every 12 h x 3doses                                                                                                             | IV Ibuprofen 10 mg/kg, followed by 5 mg/kg at 24 and 48 h                                     |
| 80     | Pezzati 1999                 | English                 | 17                    | INDO 29.5 <sup>a</sup> (2.6) <sup>c</sup><br>IBU 29.1 <sup>a</sup> (2.1) <sup>c</sup>                | INDO 1277 <sup>a</sup> (440) <sup>c</sup><br>IBU 1151 <sup>a</sup> (426) <sup>c</sup>                | INDO 1.38 <sup>a</sup> (0.22) <sup>c</sup><br>IBU 1.33 <sup>a</sup> (0.18) <sup>c</sup>                                               | Probably High                      | LA:AO>1.4                                                                                                                                                                                                                                                                                                                                        | IV Indomethacin 0.2 mg/kg followed by two doses of 0.1mg/kg every 24 hours                                                                                | IV Ibuprofen 10 mg/kg followed by 5 mg/kg at 24 and 48 h                                      |
| 81     | Pistulli 2014                | English                 | 68                    | NR                                                                                                   | NR                                                                                                   | NR                                                                                                                                    | Probably High                      | PDA >1.5 mm, LA:AO >1.4, and a left-to-right shunting of blood in addition to clinical signs of hs-PDA.                                                                                                                                                                                                                                          | IV Ibuprofen 10 mg/kg, followed by 5 mg/kg at 24 and 48 h                                                                                                 | IV Ibuprofen 10 mg/kg, followed by 5 mg/kg at 24 and 48 h                                     |
| 82     | Pourarian 2008               | English                 | 20                    | INDO 33.2 <sup>a</sup> (3.1) <sup>c</sup><br>IBU 31.3 <sup>a</sup> (4.4) <sup>c</sup>                | INDO 1720 <sup>a</sup> (6302) <sup>c</sup><br>IBU 1860 <sup>a</sup> (402) <sup>c</sup>               | INDO 6.4 <sup>a</sup><br>IBU 5.5 <sup>a</sup>                                                                                         | Probably Low                       | Presence of hs-PDA on echo; criteria not specified                                                                                                                                                                                                                                                                                               | Oral Indomethacin 0.2 mg/kg every 24h x 3days (Administration of 2nd and 3rd doses was dependent on achievement of ductal closure after the initial dose) | Oral Ibuprofen 10 mg/kg, followed by 5 mg/kg after 24 and 48 h                                |

**eTable 4. Clinical & Methodological Characteristics of Included Studies**

(cont'd...)

| Ref No | Author & year of publication | Language of publication | # of infants enrolled | Gestational age at birth (in weeks)                                                                        | Birth weight (in grams)                                                                                      | Age at start of treatment (days) [Mean <sup>a</sup> (SD <sup>c</sup> )/ [Median <sup>b</sup> (IQR <sup>d</sup> )/Range <sup>e</sup> ] | Overall assessment of risk of bias | Criteria for diagnosis of hs-PDA                                                                                                                                                                                                                                                    | Intervention characteristics (drug: route & dose)                                                                                                                                               |                                                                                                                                                                        |
|--------|------------------------------|-------------------------|-----------------------|------------------------------------------------------------------------------------------------------------|--------------------------------------------------------------------------------------------------------------|---------------------------------------------------------------------------------------------------------------------------------------|------------------------------------|-------------------------------------------------------------------------------------------------------------------------------------------------------------------------------------------------------------------------------------------------------------------------------------|-------------------------------------------------------------------------------------------------------------------------------------------------------------------------------------------------|------------------------------------------------------------------------------------------------------------------------------------------------------------------------|
|        |                              |                         |                       | [Mean <sup>a</sup> (SD <sup>c</sup> )/ [Median <sup>b</sup> (IQR <sup>d</sup> )/Range <sup>e</sup> ]       | [Mean <sup>a</sup> (SD <sup>c</sup> )/ [Median <sup>b</sup> (IQR <sup>d</sup> )/Range <sup>e</sup> ]         |                                                                                                                                       |                                    |                                                                                                                                                                                                                                                                                     |                                                                                                                                                                                                 |                                                                                                                                                                        |
| 83     | Pourarian 2015               | English                 | 30                    | IBU high dose 2.6 <sup>a</sup> (30) <sup>c</sup><br>IBU standard dose 2.1 <sup>a</sup> (31.4) <sup>c</sup> | IBU high dose 1339 <sup>a</sup> (542) <sup>c</sup><br>IBU standard dose 1493 <sup>a</sup> (346) <sup>c</sup> | NR                                                                                                                                    | Probably Low                       | Presence of hs-PDA on echo; criteria not specified                                                                                                                                                                                                                                  | Oral high dose Ibuprofen at 20 mg/kg followed by two 10 mg/kg doses at 24h interval                                                                                                             | Oral Ibuprofen 10 mg/kg followed by 5 mg/kg after 24 and 48 h                                                                                                          |
| 84     | Rennie 1991                  | English                 | 121                   | INDOIVPROLONGE D 27 <sup>a</sup> (2.2) <sup>c</sup><br>INDOIV 27 <sup>a</sup> (2.2) <sup>c</sup>           | INDOIVPROLONGE D 1116 <sup>a</sup> (340) <sup>c</sup><br>INDOIV 1135 <sup>a</sup> (340) <sup>c</sup>         | NR                                                                                                                                    | Probably High                      | Clinical signs of hs-PDA                                                                                                                                                                                                                                                            | IV Indomethacin 0.1mg/kg every 24 hours x 6days                                                                                                                                                 | IV Indomethacin 0.2 mg/kg every 12 h x 3 doses                                                                                                                         |
| 85     | Rhodes 1988                  | English                 | 70                    | INDOIVPROLONGE D 27 <sup>a</sup> (2.3) <sup>c</sup><br>INDOIV 27 <sup>a</sup> (2.2) <sup>c</sup>           | INDOIVPROLONGE D 975 <sup>a</sup> (234) <sup>c</sup><br>INDOIV 972 <sup>a</sup> (245) <sup>c</sup>           | <1                                                                                                                                    | Probably High                      | Left-to-right shunting through PDA on echo                                                                                                                                                                                                                                          | IV Indomethacin initial two doses of 0.15 mg/kg given 12h apart followed by 0.1 mg/kg every day for 5 days                                                                                      | IV Indomethacin two doses of 0.15 mg/kg given 12h apart                                                                                                                |
| 86     | Romagnoli 1997               | English                 | 34                    | INDOIVFRU 27.9 <sup>a</sup> (2.0) <sup>c</sup><br>INDOIV 28.9 <sup>a</sup> (1.9) <sup>c</sup>              | INDOIVFRU 1088 <sup>a</sup> (300) <sup>c</sup><br>INDOIV 1159 <sup>a</sup> (238) <sup>c</sup>                | INDOIVFRU 3.0 <sup>a</sup> (1.7) <sup>c</sup><br>INDOIV 3.9 <sup>a</sup> (3.4) <sup>c</sup>                                           | Probably High                      | Clinical criteria: appearance of systolic or continuous murmur, respiratory "step-up" with increased ventilatory pattern, progressive increase of basal heart rate, and presence of bounding radial pulses. The clinical diagnosis was confirmed by color Doppler echocardiography. | IV Indomethacin 0.2 mg/kg every 12 h x 3doses PLUS IV Frusemide 0.1mg/kg every 12h x 3 doses                                                                                                    | IV Indomethacin 0.2 mg/kg every 12 h x 3doses                                                                                                                          |
| 87     | Rudd 1983                    | English                 | 30                    | PLAC 29.0 <sup>a</sup> (1.7) <sup>c</sup><br>INDO 28.9 <sup>a</sup> (1.2) <sup>c</sup>                     | PLAC 1170 <sup>a</sup> (211) <sup>c</sup><br>INDO 1105 <sup>a</sup> (251) <sup>c</sup>                       | PLAC 10.2 <sup>a</sup> (5.3) <sup>c</sup><br>INDO 11.0 <sup>a</sup> (8.1) <sup>c</sup>                                                | Probably Low                       | LA:AO Ratio ≥ 1.2                                                                                                                                                                                                                                                                   | Oral Indomethacin 0.2 mg/kg every 12h x 3 doses (maximum)                                                                                                                                       | Placebo                                                                                                                                                                |
| 88     | Sangtawesin 2008             | English                 | 62                    | IBU 29.3 <sup>a</sup> (1.94) <sup>c</sup><br>PLAC 29.3 <sup>a</sup> (2.16) <sup>c</sup>                    | IBU 1156.9 <sup>a</sup> (263.6) <sup>c</sup><br>PLAC 1162.9 <sup>a</sup> (261.0) <sup>c</sup>                | IBU 0.75 <sup>a</sup> (0.25) <sup>c</sup><br>PLAC 0.84 <sup>a</sup> (0.24) <sup>c</sup>                                               | Probably Low                       | PDA> 1.5mm<br>LA:AO>1.4                                                                                                                                                                                                                                                             | Oral Ibuprofen 10 mg/kg followed by 5 mg/kg after 24 and 48 h                                                                                                                                   | Placebo (oral orange starch)                                                                                                                                           |
| 89     | Sosenko 2012                 | English                 | 105                   | IBU 26 <sup>b</sup> (23-28) <sup>d</sup><br>PLAC 25 <sup>b</sup> (24-29) <sup>d</sup>                      | IBU 854 <sup>a</sup> (204) <sup>c</sup><br>PLAC 842 <sup>a</sup> (203) <sup>c</sup>                          | 3                                                                                                                                     | Low                                | Presence of PDA with either predominantly left-to-right or bidirectional shunt                                                                                                                                                                                                      | IV Ibuprofen initial dose of 10 mg/kg followed by two doses of 5 mg/kg each after 24 and 48 h                                                                                                   | Placebo (5% Dextrose IV)                                                                                                                                               |
| 90     | Su BH 1999                   | English                 | 93                    | INDO 27.8 <sup>a</sup> (2.5) <sup>c</sup><br>INDOIVECHOGUIDE D 27.2 <sup>a</sup> (2.6) <sup>c</sup>        | INDO 1039 <sup>a</sup> (244) <sup>c</sup><br>INDOIVECHOGUIDE D 955 <sup>a</sup> (271)                        | NR                                                                                                                                    | Probably High                      | Pulsatile or growing pattern of left-right PDA shunt on Doppler echo                                                                                                                                                                                                                | IV Indomethacin 0.2 mg/kg for the first dose, then 0.1 mg/kg in infants less than 48 hours old, 0.2 mg/kg in infants over 48 hours, every 12 hours for another two doses                        | IV Indomethacin: one unique dose of 0.2 mg/kg initially followed by subsequent doses as per the standard IV Indomethacin regimen only if echocardiography shows hs-PDA |
| 91     | Su BH 2008                   | English                 | 119                   | IBU 25 <sup>b</sup> (23-28) <sup>d</sup><br>INDO 25 <sup>b</sup> (23-28) <sup>d</sup>                      | IBU 825 <sup>b</sup> (550-990) <sup>d</sup><br>INDO 762 <sup>b</sup> (540-980) <sup>d</sup>                  | IBU 0.33 <sup>b</sup> (0.17-0.88) <sup>d</sup><br>INDO 0.33 <sup>b</sup> (0.12-1.0) <sup>d</sup>                                      | Probably Low                       | Pulsatile or growing pattern of left-right PDA shunt on Doppler echo                                                                                                                                                                                                                | IV Indomethacin 0.2mg/kg as the initial dose followed by 0.1 mg/ kg in infants less than 48 hours old, 0.2 mg/kg in infants over 48 hours at 24-hour intervals as indicated by PDA flow pattern | IV Ibuprofen 10 mg/kg, followed by 5 mg/kg at 24 and 48 h as indicated by the PDA flow pattern                                                                         |
| 92     | Su PH 2003                   | English                 | 63                    | IBU 28.7 <sup>a</sup> ( 2.2) <sup>c</sup><br>INDO 28.2 <sup>a</sup> (2.4) <sup>c</sup>                     | IBU 1133.9 <sup>a</sup> (200.0) <sup>c</sup><br>INDO 1109.5 <sup>a</sup> (244.1) <sup>c</sup>                | IBU 4.1 <sup>a</sup> (1.3) <sup>c</sup><br>INDO 4.9 <sup>a</sup> (3.7) <sup>c</sup>                                                   | Probably High                      | Left-right PDA shunt; LA:AO> 1:3; PDA>1.5 mm.                                                                                                                                                                                                                                       | IV Indomethacin 0.2 mg/kg every 12 h x 3doses                                                                                                                                                   | IV Ibuprofen 10 mg/kg, followed by 5 mg/kg at 24 and 48 h                                                                                                              |

**eTable 4. Clinical & Methodological Characteristics of Included Studies**

**(cont'd...)**

| Ref No | Author & year of publication | Language of publication | # of infants enrolled | Gestational age at birth (in weeks)                                                                  | Birth weight (in grams)                                                                              | Age at start of treatment (days) [Mean <sup>a</sup> (SD <sup>c</sup> )/ [Median <sup>b</sup> (IQR <sup>d</sup> )/Range <sup>e</sup> ] | Overall assessment of risk of bias | Criteria for diagnosis of hs-PDA                                                                                                                                                                                                                                                                                                                                                                                                                            | Intervention characteristics (drug: route & dose)                                                                                                                                                                                                              |                                                                |
|--------|------------------------------|-------------------------|-----------------------|------------------------------------------------------------------------------------------------------|------------------------------------------------------------------------------------------------------|---------------------------------------------------------------------------------------------------------------------------------------|------------------------------------|-------------------------------------------------------------------------------------------------------------------------------------------------------------------------------------------------------------------------------------------------------------------------------------------------------------------------------------------------------------------------------------------------------------------------------------------------------------|----------------------------------------------------------------------------------------------------------------------------------------------------------------------------------------------------------------------------------------------------------------|----------------------------------------------------------------|
|        |                              |                         |                       | [Mean <sup>a</sup> (SD <sup>c</sup> )/ [Median <sup>b</sup> (IQR <sup>d</sup> )/Range <sup>e</sup> ] | [Mean <sup>a</sup> (SD <sup>c</sup> )/ [Median <sup>b</sup> (IQR <sup>d</sup> )/Range <sup>e</sup> ] |                                                                                                                                       |                                    |                                                                                                                                                                                                                                                                                                                                                                                                                                                             |                                                                                                                                                                                                                                                                |                                                                |
| 93     | Supapannachart 2002          | English                 | 18                    | IBU 30.1 <sup>a</sup> (2.7) <sup>c</sup><br>INDO 30.4 <sup>a</sup> (2.6) <sup>c</sup>                | IBU 1446.7 <sup>a</sup> (38.5) <sup>c</sup><br>INDO 1431.7 <sup>a</sup> (1431.7) <sup>c</sup>        | IBU 3.0 <sup>a</sup> (1.1) <sup>c</sup><br>INDO 3.4 <sup>a</sup> (2.2) <sup>c</sup>                                                   | High                               | Clinical Criteria: (a) Systolic murmur at left upper parasternal border; (b) Continuous murmur at left upper parasternal border; (c) Active precordium; (d) Bounding pulse, wide pulse pressure (pulse pressure >35 mmHg) (e) Tachycardia (heart rate >170/min) (f) Hepatomegaly (g) Chest X-ray with cardiomegaly (CT ratio>0.6) or increased pulmonary vasculature. Any infant with more than 3 of the above criteria was diagnosed with symptomatic PDA. | IV Indomethacin 0.2 mg/kg every 12 h x 3doses                                                                                                                                                                                                                  | Oral Ibuprofen 10mg/kg daily for 3 consecutive days            |
| 94     | Tammela 1999                 | English                 | 61                    | INDOIV 27.9 <sup>a</sup> (2.3) <sup>c</sup><br>INDOIVPROLONGED 27.3 <sup>a</sup> (1.94) <sup>c</sup> | INDOIV 1154 <sup>a</sup> (388) <sup>c</sup><br>INDOIVPROLONGED 2094 <sup>a</sup> (298) <sup>c</sup>  | INDOIV 4.3 <sup>a</sup> (4.4) <sup>c</sup><br>INDOIVPROLONGED 3.1 <sup>a</sup> (1.7) <sup>c</sup>                                     | Probably High                      | Clinical signs & left-right PDA shunt on Doppler echo                                                                                                                                                                                                                                                                                                                                                                                                       | IV Indomethacin 0.2 mg/kg followed by 2 doses of 0.1 mg/kg at 12-hour intervals                                                                                                                                                                                | IV Indomethacin: 7 doses of 0.1mg/kg at 24 h intervals         |
| 95     | Van Overmeire 1995           | English                 | 75                    | INDO 29.6 <sup>a</sup> (2.5) <sup>c</sup><br>ASA 29.7 <sup>a</sup> (2.5) <sup>c</sup>                | INDO 1292 <sup>a</sup> (434) <sup>c</sup><br>ASA 1298 <sup>a</sup> (494) <sup>c</sup>                | INDO 3.45 <sup>a</sup> (0.69) <sup>c</sup><br>ASA 3.43 <sup>a</sup> (0.65) <sup>c</sup>                                               | Probably High                      | 1) Moderate PDA: Disturbed diastolic flow easily detectable at all sites of the pulmonary trunk, a diastolic back flow was present in the aorta immediately beneath the PDA and a forward flow above the PDA; 2) Large (severe) PDA: If a diastolic back flow was detectable in the abdominal aorta at the level of the celiac arterial trunk and if dilatation of the left atrium was present expressed as a LA:AO> 1.7                                    | IV Indomethacin 0.2 mg/kg every 12 h x 3doses                                                                                                                                                                                                                  | IV Aspirin 15mg/kg/dose every 6h x 4doses                      |
| 96     | Van Overmeire 1997           | English                 | 40                    | INDO 28.7 <sup>a</sup> (1.9) <sup>c</sup><br>IBU 29.0 <sup>a</sup> (2.4) <sup>c</sup>                | INDO 1210 <sup>a</sup> (360) <sup>c</sup><br>IBU 1270 <sup>a</sup> (450) <sup>c</sup>                | INDO 3.1 <sup>a</sup> (0.5) <sup>c</sup><br>IBU 3.2 <sup>a</sup> (0.4) <sup>c</sup>                                                   | Probably Low                       | (1) Moderate PDA shunt: if a disturbed diastolic flow was easily detectable at all sites of the pulmonary trunk, a diastolic back flow was present in the aorta immediately beneath the PDA and a forward flow above the PDA; (2) Severe PDA shunt: If a diastolic back flow was detectable in the aorta and if dilatation of the left atrium was present and expressed as a LA:AO>1.6                                                                      | IV Indomethacin 0.2 mg/kg every 12 h x 3doses                                                                                                                                                                                                                  | IV Ibuprofen 10 mg/kg, followed by 5 mg/kg at 24 and 48 h      |
| 97     | Van Overmeire 2000           | English                 | 148                   | INDO 29.0 <sup>a</sup> (2.1) <sup>c</sup><br>IBU 29.0 <sup>a</sup> (2.3) <sup>c</sup>                | INDO 1230 <sup>a</sup> (380) <sup>c</sup><br>IBU 1230 <sup>a</sup> (390) <sup>c</sup>                | INDO 3.1 <sup>a</sup> (0.5) <sup>c</sup><br>IBU 3.1 <sup>a</sup> (0.6) <sup>c</sup>                                                   | Probably Low                       | (1) Moderate PDA shunt: If a disturbed diastolic flow was easily detected in the main pulmonary artery with a diastolic reversed flow in the aorta beneath the ductus and a forward flow above the ductal insertion; (2) Severe PDA shunt: If a diastolic backflow in the aorta was straightforward and if dilatation of the left atrium was present (LA:AO > 1.6)                                                                                          | IV Indomethacin 0.2 mg/kg every 12 h x 3 doses                                                                                                                                                                                                                 | IV Ibuprofen 10 mg/kg, followed by 5 mg/kg at 24 and 48 h      |
| 98     | Van Overmeire 2001           | English                 | 127                   | INDO 28.9 <sup>a</sup> (2.0) <sup>c</sup><br>INDOLATE 29.2 <sup>a</sup> (2.1) <sup>c</sup>           | INDO 1210 <sup>a</sup> (370) <sup>c</sup><br>INDOLATE 1270 <sup>a</sup> (365) <sup>c</sup>           | NR                                                                                                                                    | Probably Low                       | (1) Moderate PDA shunt: If a disturbed diastolic flow was easily detected in the main pulmonary artery with a diastolic reversed flow in the aorta beneath the ductus and a forward flow above the ductal insertion; (2) Severe PDA shunt: If a diastolic backflow in the aorta was straightforward and if dilatation of the left atrium was present (LA:AO > 1.5).                                                                                         | IV Indomethacin 0.2 mg/kg every 12 h x 3doses started on day 3                                                                                                                                                                                                 | IV Indomethacin 0.2 mg/kg every 12 h x 3doses started on day 7 |
| 99     | Yadav 2014                   | English                 | 83                    | IBU 29.65 <sup>a</sup> (3.15) <sup>c</sup><br>INDO 30.29 <sup>a</sup> (3.14) <sup>c</sup>            | IBU 1440 <sup>a</sup> (450) <sup>c</sup><br>INDO 1380 <sup>a</sup> (450) <sup>c</sup>                | IBU 10.1 <sup>a</sup> (6.1) <sup>c</sup><br>INDO 9.8 <sup>a</sup> (6.0) <sup>c</sup>                                                  | Probably Low                       | PDA> 1.5mm LA:AO>1.4                                                                                                                                                                                                                                                                                                                                                                                                                                        | Oral Indomethacin three doses (0.20-0.25 mg/kg every 24 h) depending on the gestational age (initial dose was 0.2 mg/kg, subsequent doses 2-7 days of age were 0.2mg/kg/dose every 24 h for two doses; >7 days of age 0.25mg/kg/dose every 24 h for two doses) | Oral Ibuprofen 10 mg/kg followed by 5 mg/kg after 24 and 48 h  |

**eTable 4. Clinical & Methodological Characteristics of Included Studies**

(cont'd...)

| Ref No | Author & year of publication | Language of publication | # of infants enrolled | Gestational age at birth (in weeks)                                                                  | Birth weight (in grams)                                                                              | Age at start of treatment (days) [Mean <sup>a</sup> (SD <sup>c</sup> )/ [Median <sup>b</sup> (IQR <sup>d</sup> )/Range <sup>e</sup> ] | Overall assessment of risk of bias | Criteria for diagnosis of hs-PDA                                                                                                                                                                | Intervention characteristics (drug: route & dose)                                                                                                                                                                                                                                                                                                                                                                                                                                                                     |                                                                                                                                                                                                                                                                                                                               |
|--------|------------------------------|-------------------------|-----------------------|------------------------------------------------------------------------------------------------------|------------------------------------------------------------------------------------------------------|---------------------------------------------------------------------------------------------------------------------------------------|------------------------------------|-------------------------------------------------------------------------------------------------------------------------------------------------------------------------------------------------|-----------------------------------------------------------------------------------------------------------------------------------------------------------------------------------------------------------------------------------------------------------------------------------------------------------------------------------------------------------------------------------------------------------------------------------------------------------------------------------------------------------------------|-------------------------------------------------------------------------------------------------------------------------------------------------------------------------------------------------------------------------------------------------------------------------------------------------------------------------------|
|        |                              |                         |                       | [Mean <sup>a</sup> (SD <sup>c</sup> )/ [Median <sup>b</sup> (IQR <sup>d</sup> )/Range <sup>e</sup> ] | [Mean <sup>a</sup> (SD <sup>c</sup> )/ [Median <sup>b</sup> (IQR <sup>d</sup> )/Range <sup>e</sup> ] |                                                                                                                                       |                                    |                                                                                                                                                                                                 |                                                                                                                                                                                                                                                                                                                                                                                                                                                                                                                       |                                                                                                                                                                                                                                                                                                                               |
| 100    | Yanagi 1981                  | English                 | 43                    | PLAC 30.4 <sup>a</sup> (1.0) <sup>c</sup><br>INDO 29.4 <sup>a</sup> (1.0) <sup>c</sup>               | PLAC 1500 <sup>a</sup> (200) <sup>c</sup><br>INDO 1200 <sup>a</sup> (100) <sup>c</sup>               | PLAC 9.1 <sup>a</sup> (6.6) <sup>c</sup><br>INDO 8.6 <sup>a</sup> (9.8) <sup>c</sup>                                                  | Probably Low                       | LA:AO ≥1.3 and continuous requirement of ventilator support                                                                                                                                     | Oral Indomethacin was administered in 2 phases: In phase 1, 2 mg/kg of indomethacin was administered as the first dose, second and third doses were administered 24 and 48 hours following the first dose as long as the clinical and echocardiographic criteria of sPDA persisted. In phase 2, the dose interval was decreased to eight rather than 24 hours and the second and third doses were thus administered at eight and 16 hours after the first dose. Digitalis and furosemide were used as cointerventions | Oral placebo was used. Small amount of cornstarch was added to 250 mg of lactose to achieve an appearance similar to that of the indomethacin vials. Just prior to administration, 9.5 ml of normal saline was added to each vial and 0.4 ml/kg of this suspension (0.2 mg/kg of indomethacin or placebo) was administered    |
| 101    | Yang 2016                    | English                 | 87                    | IBU 33.4 <sup>a</sup> (2.1) <sup>c</sup><br>PARA 33.6 <sup>a</sup> (2.1) <sup>c</sup>                | IBU 2091 <sup>a</sup> (657) <sup>c</sup><br>PARA 2219 <sup>a</sup> (606) <sup>c</sup>                | IBU 5.8 <sup>a</sup> (2) <sup>c</sup><br>PARA 6.4 <sup>a</sup> (1.8) <sup>c</sup>                                                     | Probably High                      | PDA > 1.4 mm; LA:AO>1.4                                                                                                                                                                         | Oral Ibuprofen 10 mg/kg followed by 5 mg/kg after 24 and 48 h                                                                                                                                                                                                                                                                                                                                                                                                                                                         | Oral acetaminophen 15 mg/kg every 6 h for 5 days                                                                                                                                                                                                                                                                              |
| 102    | Yeh 1981                     | English                 | 55                    | PLAC 30.2 <sup>a</sup> (2.3) <sup>c</sup><br>INDO 31.5 <sup>a</sup> (2.3) <sup>c</sup>               | PLAC 1167 <sup>a</sup> (354) <sup>c</sup><br>INDO 1233 <sup>a</sup> (408) <sup>c</sup>               | PLAC 10.9 <sup>a</sup> (6.1) <sup>c</sup><br>INDO 8.9 <sup>a</sup> (5.3) <sup>c</sup>                                                 | Low                                | Cardiovascular dysfunction score ≥ 3 or LA:AO ≥ 1.3 on echo                                                                                                                                     | IV Indomethacin: One dose of 0.3 mg/kg was administered intravenously and was repeated at intervals of about 24 hours up to a maximum of three doses, unless the PDA murmur disappeared. IV Furosemide (1mg/kg) and fluid restriction were used as cointerventions in both groups                                                                                                                                                                                                                                     | IV Placebo: Identical syringes containing either indomethacin 1 mg in 1 ml saline diluent or a placebo consisting of 1 ml of saline only were prepared. A dose of 0.3 ml/kg was administered intravenously and was repeated at intervals of about 24 hours up to a maximum of three doses, unless the PDA murmur disappeared. |
| 103    | Yeh 1982                     | English                 | 19                    | INDO 30.4 <sup>a</sup> (0.9) <sup>c</sup><br>INDOIVFRU 30.7 <sup>a</sup> (0.8) <sup>c</sup>          | INDO 1120 <sup>a</sup> (390) <sup>c</sup><br>INDOIVFRU 1190 <sup>a</sup> (100) <sup>c</sup>          | INDO 10.7 <sup>a</sup> (3.4) <sup>c</sup><br>INDOIVFRU 9.5 <sup>a</sup> (1.7) <sup>c</sup>                                            | Probably Low                       | Clinical criteria: (1) evidence of PDA, and (2) evidence of significant clinical cardiovascular Dysfunction along with echocardiographic left atrium/aortic root dimension ratio (LA:AO) ≥ 1.30 | IV Indomethacin 0.3mg/kg every 24h up to 3 doses                                                                                                                                                                                                                                                                                                                                                                                                                                                                      | IV Indomethacin 0.3mg/kg followed immediately IV Furosemide (1mg/kg) every 24h up to 3 doses                                                                                                                                                                                                                                  |
| 104    | Zanardo 2005                 | English                 | 46                    | IBU 26 <sup>b</sup> (23-34) <sup>c</sup><br>INDO 27.5 <sup>b</sup> (23-33) <sup>c</sup>              | IBU 857.5 <sup>b</sup> (500-2110) <sup>c</sup><br>INDO 977.5 <sup>b</sup> (616-2450) <sup>c</sup>    | IBU 3 <sup>b</sup> (2-17) <sup>c</sup><br>INDO 2.5 <sup>b</sup> (2-12) <sup>c</sup>                                                   | Probably Low                       | Infants with RDS who required ventilator support along with typical flow pattern of hs-PDA on Doppler echo                                                                                      | IV Indomethacin 0.2 mg/kg every 12 h x 3doses                                                                                                                                                                                                                                                                                                                                                                                                                                                                         | IV Ibuprofen 10 mg/kg, followed by 5 mg/kg at 24 and 48 h                                                                                                                                                                                                                                                                     |

**Abbreviations:**

- SD: Standard deviation
- IQR: Interquartile range
- INDO: Indomethacin
- IBU: Ibuprofen
- PLAC: Placebo
- PARA: Acetaminophen
- NR: Not reported
- ASA: Acetylsalicylic acid (aspirin)
- INDOLATE: Intravenous indomethacin standard dose; late initiation of therapy (started on or beyond day 7)
- INDOIVPROLONGED: Intravenous indomethacin prolonged treatment course
- INDOIVFRU: Intravenous indomethacin standard dose along with Frusemide
- INDOIVECHOGUIDED: Intravenous indomethacin standard dose; duration guided by echo assessment of PDA
- hs-PDA: hemodynamically significant patent ductus arteriosus
- LA:AO: Left atrium to aortic root ratio on echocardiography
- LV:AO: Left ventricle to aortic root ratio on echocardiography



**eFigure 2. Detailed risk of Bias assessment of individual studies**

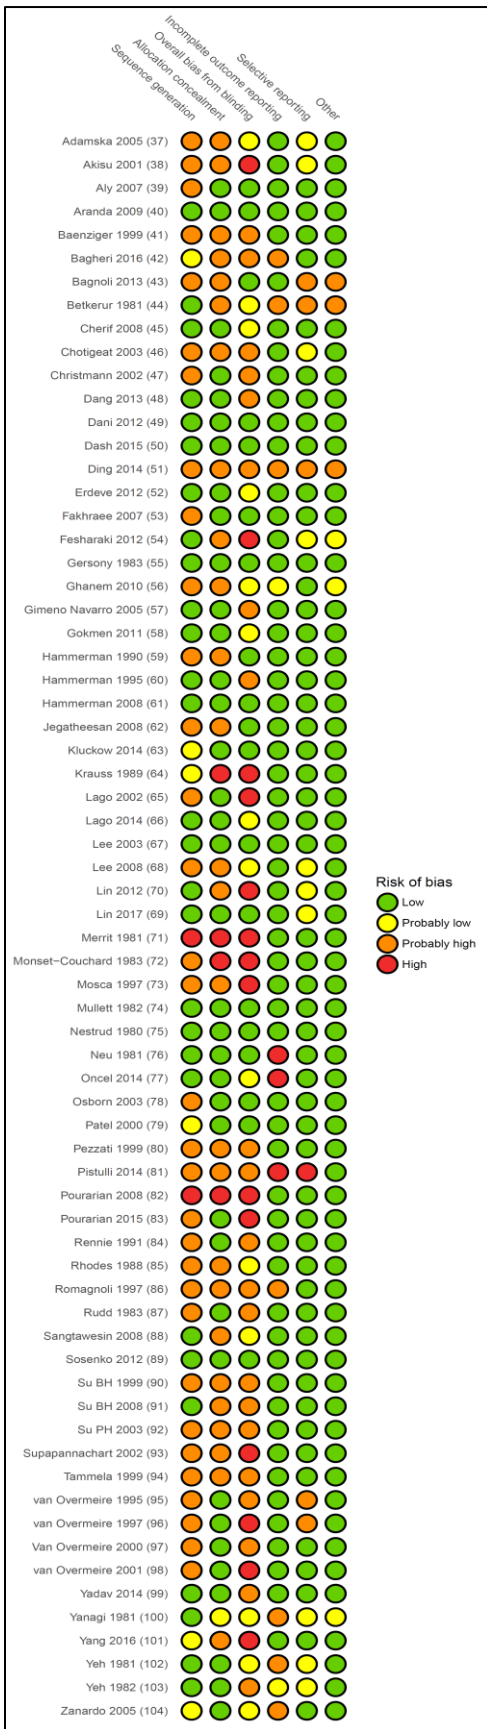

- **Risk of Bias (RoB) assessment items:** Sequence generation; Allocation concealment; Blinding; Incomplete outcome data; Selective reporting of outcomes; other biases
- **RoB categories:** Low; Probably low; Probably High; High

**eFigure 3. Assessment summary across the risk of bias items**

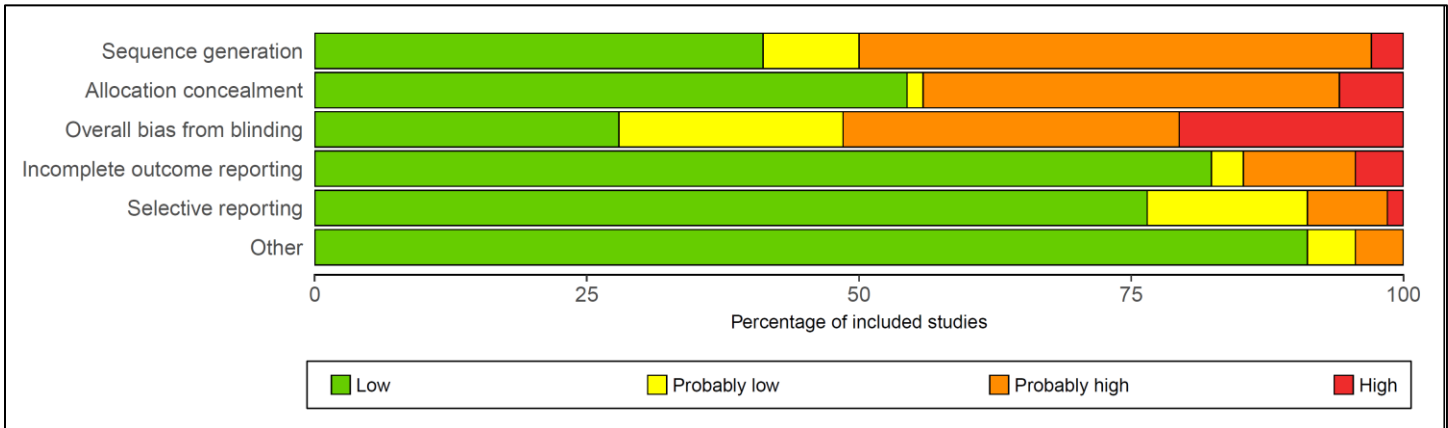

- **Risk of Bias (RoB) assessment items:** Sequence generation; Allocation concealment; Blinding; Incomplete outcome data; Selective reporting of outcomes; other biases
- **RoB categories:** Low; Probably low; Probably High; High
- **Number of studies included in the summary:** 68

## eText 2. Guide to interpreting NMA results (rankograms; SUCRA; Network GRADE)

### eText 2(a). Rankograms examples and interpretation

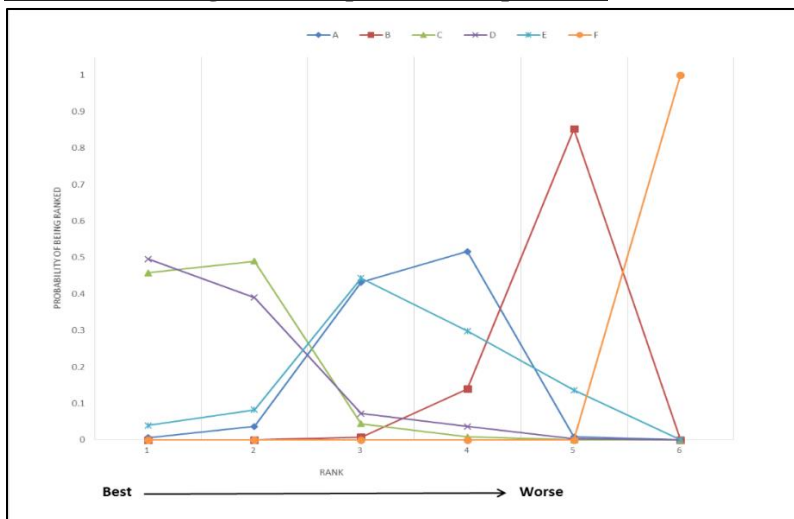

eText 2(a):rankogram example figure

The figure above displays an example of a rankogram in a hypothetical study comparing 6 interventions for a specific outcome. The figure shows each intervention with a different color and symbol. The horizontal axis displays the ranking from 1 to 6. Ranking should be interpreted from best (rank 1), to worst (rank 6), for this specific outcome. The vertical axis displays the probability of being ranked in any specific ranking position, from 0 to 1. In order to systematically interpret a rankogram, one should start by focusing on rank 1 first, establish which intervention might be the best and then follow the same for each rank. As shown in the figure above, in rank 1, the treatment D showed slightly more than 0.5 probability of being ranked the best, or being ranked in the first position. After treatment D, treatment C had a probability of approximately 0.46 of being ranked in the first place, while treatment E had a probability of approximately 0.05 of being ranked the first. Of note, treatments A, B and F only had probabilities of around 0 of being best ranked. Similarly, the last position on the right of the curve, rank 6, shows the probability of being ranked as the worst treatment. In this case, intervention F had the highest probability of being in rank 6 (approximately 0.99).

In summary, rankograms allow the reader to see for each treatment, the probability of being ranked in the first, second, third position, and so on, until the worst (depending on the number of interventions analyzed) (3). In this case, treatment D was found to be the one with the highest probability of being the best while treatment F had the highest probability of being the worst treatment.

### eText 2(b). SUCRA examples and interpretation

Surface under the cumulative ranking curve (SUCRA) summarizes the information from the rankograms as a single number. Its calculation is based on the cumulative probabilities of the treatments being ranked in each position, and the SUCRA is the final area under the curve of the graph for these probabilities. This is a simple numerical summary to supplement the graphical display. SUCRA would be 1 when a treatment is certain to be the best and 0 when a treatment is certain to be the worst (4). If a treatment always ranks first, then SUCRA=1, and if it always ranks last, it will have SUCRA=0. For example, if cumulative probabilities are computed using the information from the rankogram above, we would obtain the mean SUCRA value for each intervention, as presented in the SUCRA example table below. The median ranks for each treatment option are also provided along with. This enables overall ranking of the treatments based on the mean SUCRA value. In this case, treatment C emerges as the best (SUCRA, 0.88), followed by D, E, A, B and lastly F (SUCRA, 0). Thus, SUCRA simplifies the information on the ranking distribution of each treatment into a single number, which helps to summarize the ranking statistics in a complex network meta-analysis.

eText 2(b):SUCRA example table

| Treatment | Mean SUCRA (standard deviation) | Median rank (95% credible intervals) |
|-----------|---------------------------------|--------------------------------------|
| A         | 0.50 (0.12)                     | 4 (2-4)                              |
| B         | 0.23 (0.08)                     | 5 (4-5)                              |
| C         | 0.88 (0.12)                     | 2 (1-3)                              |
| D         | 0.87 (0.16)                     | 2 (1-4)                              |
| E         | 0.52 (0.19)                     | 3 (1-5)                              |
| F         | 0                               | 6 (6-6)                              |

## eText 2(c). Network GRADE Assessment Strategy

The assessment of the confidence in the estimates (quality of evidence) for each reported outcome was performed according to the GRADE approach (5). To assess GRADE quality of evidence in a network meta-analysis, both direct and indirect comparisons are taken into account. A **direct comparison** between two treatment options is defined as a comparison based on head-to-head RCTs between the two treatment options. An **indirect comparison** between two treatment options is computed when no head-to-head RCTs have been conducted between the two respective treatment options (described in detail below). Initially, direct comparisons were assessed and rated based on the following categories: risk of bias; indirectness; inconsistency (which is determined based on the heterogeneity); imprecision and publication bias (6-9). This was followed by assessment of confidence from indirect estimates and the final step was assessment of confidence in the NMA estimates (10). The final confidence was rated based on four levels: high, moderate, low and very low.

For rating confidence in the indirect comparisons, information obtained from the first and second order loops in the network was used as shown in the example figure below.

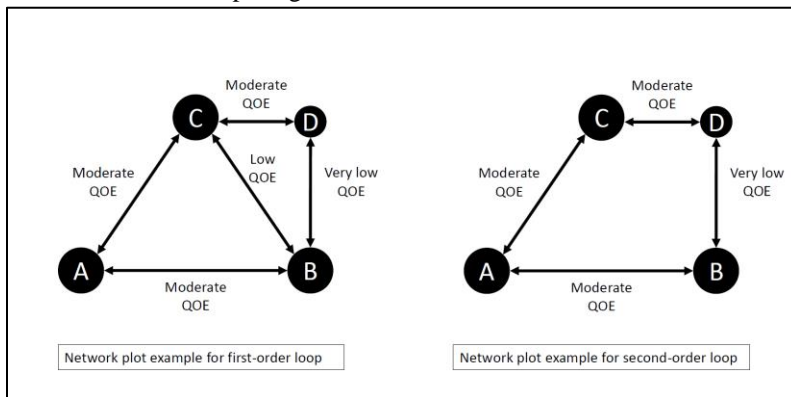

In the above networks, each node indicates a treatment strategy and each of two-way arrows indicates a direct comparison between two strategies. In the first figure above (*network plot example for first-order loop*), for the comparison of A vs. B, the pathway of A-C-B is a first-order loop and the pathway of A-C-D-B is a second-order loop. The quality of evidence of indirect comparisons was derived from the quality of evidence of the first order loops. The quality of evidence of a first-order loop was derived from the lowest quality of evidence among direct comparisons within the first-order loop. In the first example figure, the quality of evidence of the indirect comparison of A vs. B was the lower quality of evidence among 2 direct comparisons of A vs. C (moderate) and B vs. C (low), which was low quality of evidence. When an indirect comparison had two or more first-order loops, the highest quality of evidence among its first-order loops were used for the quality of evidence of the indirect comparison. For example, the quality of evidence for the indirect comparison of B vs. C was the highest quality of evidence of the 2 first order loops of B-A-C (moderate) and B-D-C (very low), which was moderate quality of evidence. When no first order loop was available, the quality of evidence for an indirect comparison was derived from the second-order loops. In the second figure above (*network plot example for second-order loop*), the quality of evidence for the indirect comparison between A vs. B was derived from the lowest quality of evidence among the 3 direct comparisons within the 2nd order loops including A vs. C (moderate), C vs. D (moderate) and D vs. B (very low). So the final quality of evidence for the indirect comparison of A vs B was adjudged to be very low. In addition, the final indirect confidence rating was rated down by one level, if there was a strong suspicion that the transitivity assumption was violated for this loop (11) Transitivity is the assumption that an indirect comparison is a valid method to compare two treatments, because the studies are sufficiently similar in important clinical and methodological characteristics, or in other words, that they are similar in their distributions of effect modifiers (12, 13).

The overall confidence in the NMA estimates for any paired comparison was rated using the higher of the confidence rating amongst the contributing direct and indirect comparisons. For example, if a NMA estimate was obtained from combining direct evidence of A vs. B that was rated as moderate, and indirect evidence of A vs. B that was rated as Low, the final A vs B NMA estimate would be rated as moderate.

Additionally, this confidence in the NMA estimate was rated down if it was found that the direct and indirect estimates had incoherence (also called inconsistency), which was defined as the differences between direct and indirect estimates of effect (10). Inconsistency was quantitatively computed using the **node-splitting model**. In a node-splitting analysis a treatment comparison is split into a parameter for direct evidence and a parameter for indirect evidence in order to assess whether there is significant disagreement between the two parameters (14). In this NMA, a node-splitting analysis was performed separately for each of the comparisons in the treatment network on which both direct and indirect evidence were available, to assess evidence consistency. A p value less than 0.05 indicated significant inconsistency between the direct and indirect comparisons. This was computed using the GeMTC GUI 0.14.3 package (15).

**eFigure 4. Network meta-analysis forest plots for outcome: PDA closure**

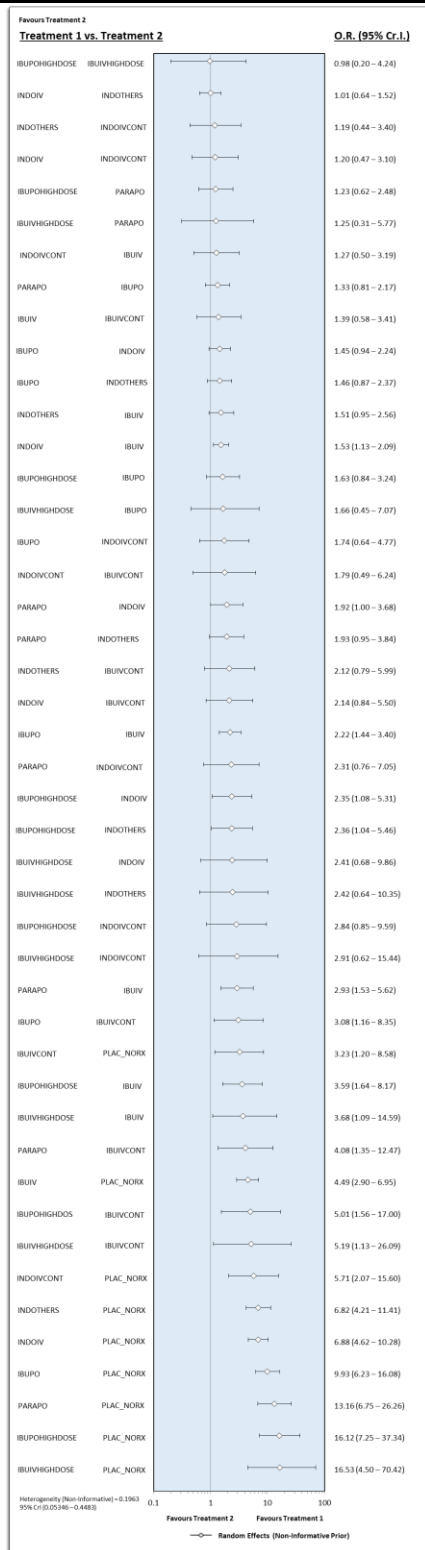

eFigure 4: Forest plot showing network effect estimates (OR with 95% credible intervals) for each possible treatment comparison in the network for PDA closure computed using Bayesian RE model with non-informative priors; the horizontal axis denotes network odds ratios (with 95% credible intervals)

**eTable 5. GRADE assessment of the Quality of Evidence (QoE) for the network for PDA closure**

| <b>eTable 5. GRADE assessment of the Quality of Evidence (QoE) for the network for PDA closure</b> |                           |                                    |                                  |                     |                                         |                                           |                      |                                                            |                                                              |             |                                                             |
|----------------------------------------------------------------------------------------------------|---------------------------|------------------------------------|----------------------------------|---------------------|-----------------------------------------|-------------------------------------------|----------------------|------------------------------------------------------------|--------------------------------------------------------------|-------------|-------------------------------------------------------------|
| Treatment Comparison                                                                               | No. of direct comparisons | Events in intervention group (n/N) | Events in comparison group (n/N) | Direct OR (95% CrI) | QoE (GRADE) based on direct comparisons | QoE (GRADE) based on indirect comparisons | Network OR (95% CrI) | Inconsistency assessment (based on node splitting p value) | Changes in GRADE assessment based on precision & effect size | Network QoE | Network absolute risk difference per 1000 infants (95% CrI) |
| versus INDOIV (INDOIV)                                                                             |                           |                                    |                                  |                     |                                         |                                           |                      |                                                            |                                                              |             | ACR INDO IV 849/1125 (75.5%)                                |
| IBUIV                                                                                              | 12                        | 327/447                            | 329/436                          | 0.86(0.59-1.24)     | MODERATE                                | MODERATE                                  | 0.65(0.48-0.89)      | <0.01                                                      | Rated down (network inconsistency)                           | LOW         | 88 fewer (from 22 fewer to 158 fewer)                       |
| IBUPO                                                                                              | 4                         | 38/52                              | 41/51                            | 0.63(0.22-1.74)     | LOW                                     | MODERATE                                  | 1.45(0.94-2.24)      | 0.14                                                       | None                                                         | MODERATE    | 62 more (from 12 fewer to 119 more)                         |
| PARAPO                                                                                             | 1                         | 35/36                              | 35/37                            | 2.42(0.17-83.51)    | MODERATE                                | LOW                                       | 1.92(1.00-3.68)      | 0.06                                                       | None                                                         | MODERATE    | 101 more (from 0 fewer to 164 more)                         |
| IBUIVHIGHDOSE                                                                                      | —                         | —                                  | —                                | —                   | —                                       | MODERATE                                  | 2.41(0.68-9.86)      | —                                                          | Rated down (imprecision)                                     | LOW         | 126 more (from 78 fewer to 213 more)                        |
| IBUPOHIGHDOSE                                                                                      | —                         | —                                  | —                                | —                   | —                                       | LOW                                       | 2.35(1.08-5.31)      | —                                                          | None                                                         | LOW         | 124 more (from 14 more to 188 more)                         |
| IBUIVCONT                                                                                          | —                         | —                                  | —                                | —                   | —                                       | LOW                                       | 0.47(0.18-1.19)      | —                                                          | None                                                         | LOW         | 164 fewer (from 31 more to 398 fewer)                       |
| INDOIVCONT                                                                                         | 2                         | 18/27                              | 19/23                            | 0.39(0.09-1.74)     | LOW                                     | LOW                                       | 0.83(0.32-2.11)      | 0.3                                                        | None                                                         | LOW         | 36 fewer (from 112 more to 259 fewer)                       |
| INDOTHERS                                                                                          | 10                        | 270/403                            | 285/399                          | 0.81(0.43-1.51)     | LOW                                     | MODERATE                                  | 0.99(0.66-1.57)      | 0.14                                                       | None                                                         | MODERATE    | 2 fewer (from 74 more to 85 fewer)                          |
| PLAC_NORX                                                                                          | 4                         | 112/316                            | 140/179                          | 0.14(0.07-0.23)     | MODERATE                                | MODERATE                                  | 0.15(0.10-0.22)      | 0.94                                                       | Rated up (high precision)                                    | HIGH        | 439 fewer (from 351 fewer to 519 fewer)                     |
| versus IBUIV (IBUIV)                                                                               |                           |                                    |                                  |                     |                                         |                                           |                      |                                                            |                                                              |             | ACR IBUIV 542/786 (68.9%)                                   |
| IBUPO                                                                                              | 4                         | 133/156                            | 95/148                           | 3.25(1.77-6.26)     | HIGH                                    | LOW                                       | 2.22(1.44-3.40)      | 0.11                                                       | None                                                         | HIGH        | 142 more (from 72 more to 194 more)                         |
| PARAPO                                                                                             | —                         | —                                  | —                                | —                   | —                                       | MODERATE                                  | 2.93(1.53-5.62)      | —                                                          | None                                                         | MODERATE    | 177 more (from 83 more to 236 more)                         |
| IBUIVHIGHDOSE                                                                                      | 1                         | 30/35                              | 22/35                            | 3.82(1.07-14.71)    | MODERATE                                | NOT ESTIMABLE                             | 3.68(1.09-14.59)     | NA                                                         | None                                                         | MODERATE    | 201 more (from 18 more to 281 more)                         |
| IBUPOHIGHDOSE                                                                                      | —                         | —                                  | —                                | —                   | —                                       | MODERATE                                  | 3.59(1.64-8.17)      | —                                                          | Rated up (large effect)                                      | HIGH        | 199 more (from 95 more to 258 more)                         |
| IBUIVCONT                                                                                          | 1                         | 27/55                              | 32/56                            | 0.72(0.29-1.79)     | LOW                                     | NOT ESTIMABLE                             | 0.72(0.29-1.73)      | NA                                                         | None                                                         | LOW         | 74 fewer (from 104 more to 298 fewer)                       |
| INDOIVCONT                                                                                         | 1                         | 23/31                              | 19/32                            | 2.02(0.61-7.00)     | LOW                                     | LOW                                       | 1.27(0.50-3.19)      | 0.3                                                        | None                                                         | LOW         | 49 more (from 163 fewer to 187 more)                        |
| INDOTHERS                                                                                          | —                         | —                                  | —                                | —                   | —                                       | LOW                                       | 1.51(0.95-2.56)      | —                                                          | None                                                         | LOW         | 81 more (from 11 fewer to 161 more)                         |
| PLAC_NORX                                                                                          | 1                         | 32/68                              | 47/68                            | 0.39(0.16-0.93)     | MODERATE                                | MODERATE                                  | 0.22(0.14-0.34)      | 0.16                                                       | None                                                         | MODERATE    | 361 fewer (from 259 fewer to 452 fewer)                     |
| versus IBUPO (IBUPO)                                                                               |                           |                                    |                                  |                     |                                         |                                           |                      |                                                            |                                                              |             | ACR IBUPO 486/650 (74.8%)                                   |
| PARAPO                                                                                             | 3                         | 105/164                            | 102/163                          | 1.03(0.58-1.77)     | MODERATE                                | MODERATE                                  | 1.33(0.81-2.17)      | 0.02                                                       | Rated down (network inconsistency)                           | LOW         | 50 more (from 42 fewer to 118 more)                         |
| IBUIVHIGHDOSE                                                                                      | —                         | —                                  | —                                | —                   | —                                       | MODERATE                                  | 1.66(0.45-7.07)      | —                                                          | None                                                         | MODERATE    | 83 more (from 176 fewer to 207 more)                        |
| IBUPOHIGHDOSE                                                                                      | 2                         | 45/60                              | 31/60                            | 3.02(1.23-7.77)     | MODERATE                                | MODERATE                                  | 1.63(0.84-3.24)      | 0.16                                                       | None                                                         | MODERATE    | 81 more (from 34 fewer to 158 more)                         |
| IBUIVCONT                                                                                          | —                         | —                                  | —                                | —                   | —                                       | LOW                                       | 0.32(0.12-0.86)      | —                                                          | None                                                         | LOW         | 261 fewer (from 29 fewer to 485 fewer)                      |
| INDOIVCONT                                                                                         | —                         | —                                  | —                                | —                   | —                                       | LOW                                       | 0.58(0.21-1.56)      | —                                                          | None                                                         | LOW         | 116 fewer (from 74 more to 364 fewer)                       |
| INDOTHERS                                                                                          | 4                         | 53/74                              | 65/88                            | 0.75(0.32-1.69)     | LOW                                     | VERY LOW                                  | 0.69(0.42-1.15)      | 0.99                                                       | None                                                         | LOW         | 76 fewer (from 25 more to 193 fewer)                        |
| PLAC_NORX                                                                                          | 4                         | 70/133                             | 117/131                          | 0.11(0.05-0.22)     | VERY LOW                                | LOW                                       | 0.10(0.06-0.16)      | 0.54                                                       | Rated up (high precision)                                    | MODERATE    | 519 fewer (from 426 fewer to 597 fewer)                     |

| <b>eTable 5. GRADE assessment of the Quality of Evidence (QoE) for the network for PDA closure</b> |                           |                                    |                                  |                     |                                         |                                           |                      |                                                            |                                                              |             |                                                             |
|----------------------------------------------------------------------------------------------------|---------------------------|------------------------------------|----------------------------------|---------------------|-----------------------------------------|-------------------------------------------|----------------------|------------------------------------------------------------|--------------------------------------------------------------|-------------|-------------------------------------------------------------|
| Treatment Comparison                                                                               | No. of direct comparisons | Events in intervention group (n/N) | Events in comparison group (n/N) | Direct OR (95% CrI) | QoE (GRADE) based on direct comparisons | QoE (GRADE) based on indirect comparisons | Network OR (95% CrI) | Inconsistency assessment (based on node splitting p value) | Changes in GRADE assessment based on precision & effect size | Network QoE | Network absolute risk difference per 1000 infants (95% CrI) |
| <b>(Continued...)</b>                                                                              |                           |                                    |                                  |                     |                                         |                                           |                      |                                                            |                                                              |             |                                                             |
| versus PARAPO (PARAPO)                                                                             |                           |                                    |                                  |                     |                                         |                                           |                      |                                                            |                                                              |             | ACR PARAPO 195/267 (73%)                                    |
| IBUIVHIGHDOSE                                                                                      | —                         | —                                  | —                                | —                   | —                                       | MODERATE                                  | 1.25(0.31-5.77)      | —                                                          | None                                                         | MODERATE    | 42 more (from 210 more to 274 fewer)                        |
| IBUPOHIGHDOSE                                                                                      | 1                         | 45/62                              | 55/67                            | 0.57(0.2-1.55)      | MODERATE                                | MODERATE                                  | 1.23(0.62-2.48)      | 0.88                                                       | None                                                         | MODERATE    | 39 more (from 104 fewer to 140 more)                        |
| IBUIVCONT                                                                                          | —                         | —                                  | —                                | —                   | —                                       | LOW                                       | 0.24(0.08-0.74)      | —                                                          | None                                                         | LOW         | 336 fewer (from 63 fewer to 552 fewer)                      |
| INDOIVCONT                                                                                         | —                         | —                                  | —                                | —                   | —                                       | LOW                                       | 0.43(0.14-1.32)      | —                                                          | None                                                         | LOW         | 192 fewer (from 51 more to 455 fewer)                       |
| INDOTHERS                                                                                          | —                         | —                                  | —                                | —                   | —                                       | LOW                                       | 0.52(0.26-1.05)      | —                                                          | None                                                         | LOW         | 146 fewer (from 10 more to 317 fewer)                       |
| PLAC_NORX                                                                                          | —                         | —                                  | —                                | —                   | —                                       | MODERATE                                  | 0.08(0.04-0.15)      | —                                                          | Rated up (high precision; large effect)                      | HIGH        | 552 fewer (441 fewer to 633 fewer)                          |
| versus IBUIVHIGHDOSE (IBUIVHIGHDOSE)                                                               |                           |                                    |                                  |                     |                                         |                                           |                      |                                                            |                                                              |             | ACR IBUIVHIGHDOSE 30/35 (85.7%)                             |
| IBUPOHIGHDOSE                                                                                      | —                         | —                                  | —                                | —                   | —                                       | MODERATE                                  | 0.98(0.20-4.24)      | —                                                          | None                                                         | MODERATE    | 2 fewer (from 105 more to 312 fewer)                        |
| IBUIVCONT                                                                                          | —                         | —                                  | —                                | —                   | —                                       | LOW                                       | 0.19(0.04-0.89)      | —                                                          | None                                                         | LOW         | 324 fewer (from 15 fewer to 664 fewer)                      |
| INDOIVCONT                                                                                         | —                         | —                                  | —                                | —                   | —                                       | LOW                                       | 0.34(0.06-1.60)      | —                                                          | Rated down (imprecision)                                     | VERY LOW    | 186 fewer (from 49 more to 592 fewer)                       |
| INDOTHERS                                                                                          | —                         | —                                  | —                                | —                   | —                                       | LOW                                       | 0.41(0.10-1.57)      | —                                                          | Rated down (imprecision)                                     | VERY LOW    | 146 fewer (from 47 more to 482 fewer)                       |
| PLAC_NORX                                                                                          | —                         | —                                  | —                                | —                   | —                                       | MODERATE                                  | 0.06(0.01-0.22)      | —                                                          | Rated up (large effect)                                      | HIGH        | 592 fewer (from 288 fewer to 801 fewer)                     |
| versus IBUPOHIGHDOSE (IBUPOHIGHDOSE)                                                               |                           |                                    |                                  |                     |                                         |                                           |                      |                                                            |                                                              |             | ACR IBUPOHIGHDOSE 90/122 (73.8%)                            |
| IBUIVCONT                                                                                          | —                         | —                                  | —                                | —                   | —                                       | LOW                                       | 0.20(0.06-0.64)      | —                                                          | Rated down (imprecision)                                     | VERY LOW    | 378 fewer (from 95 fewer to 593 fewer)                      |
| INDOIVCONT                                                                                         | —                         | —                                  | —                                | —                   | —                                       | LOW                                       | 0.35(0.10-1.17)      | —                                                          | Rated down (imprecision)                                     | VERY LOW    | 242 fewer (from 29 more to 518 fewer)                       |
| INDOTHERS                                                                                          | —                         | —                                  | —                                | —                   | —                                       | LOW                                       | 0.42(0.18-0.96)      | —                                                          | None                                                         | LOW         | 190 fewer (from 8 fewer to 441 fewer)                       |
| PLAC_NORX                                                                                          | —                         | —                                  | —                                | —                   | —                                       | LOW                                       | 0.06(0.03-0.14)      | —                                                          | Rated up (large effect)                                      | MODERATE    | 593 fewer (from 455 fewer to 660 fewer)                     |
| versus IBUIVCONT (IBUIVCONT)                                                                       |                           |                                    |                                  |                     |                                         |                                           |                      |                                                            |                                                              |             | ACR IBUIVCONT 27/55 (49.1%)                                 |
| INDOIVCONT                                                                                         | —                         | —                                  | —                                | —                   | —                                       | LOW                                       | 1.79(0.49-6.24)      | —                                                          | None                                                         | LOW         | 142 more (from 170 fewer to 367 more)                       |
| INDOTHERS                                                                                          | —                         | —                                  | —                                | —                   | —                                       | LOW                                       | 2.12(0.79-5.99)      | —                                                          | None                                                         | LOW         | 181 more (from 59 fewer to 362 more)                        |
| PLAC_NORX                                                                                          | —                         | —                                  | —                                | —                   | —                                       | LOW                                       | 0.31(0.12-0.84)      | —                                                          | Rated down (imprecision)                                     | VERY LOW    | 261 fewer (from 43 more to 387 fewer)                       |
| versus INDOIVCONT (INDOIVCONT)                                                                     |                           |                                    |                                  |                     |                                         |                                           |                      |                                                            |                                                              |             | ACR INDOIVCONT 41/58 (70.7%)                                |
| INDOTHERS                                                                                          | —                         | —                                  | —                                | —                   | —                                       | LOW                                       | 1.19(0.44-3.40)      | —                                                          | None                                                         | LOW         | 35 more (from 184 more to 192 fewer)                        |
| PLAC_NORX                                                                                          | —                         | —                                  | —                                | —                   | —                                       | LOW                                       | 0.18(0.06-0.48)      | —                                                          | Rated up (high precision)                                    | MODERATE    | 404 fewer (from 170 fewer to 580 fewer)                     |
| versus INDOOTHERS (INDOTHERS)                                                                      |                           |                                    |                                  |                     |                                         |                                           |                      |                                                            |                                                              |             | ACR INDOOTHERS 380/561 (67.7%)                              |
| PLAC_NORX                                                                                          | 5                         | 13/80                              | 57/84                            | 0.09(0.0-4-0.22)    | HIGH                                    | LOW                                       | 0.15(0.09-0.24)      | 0.07                                                       | Rated up (high precision)                                    | HIGH        | 438 fewer (from 342 fewer to 518 fewer)                     |

Abbreviations: NA: Not Applicable; QoE: Quality of Evidence; OR: Odds Ratio; CrI: Credible Intervals; ACR: Assumed control risk

**eFigure 5. Ranking probability (rankogram) of each treatment modality for PDA closure**

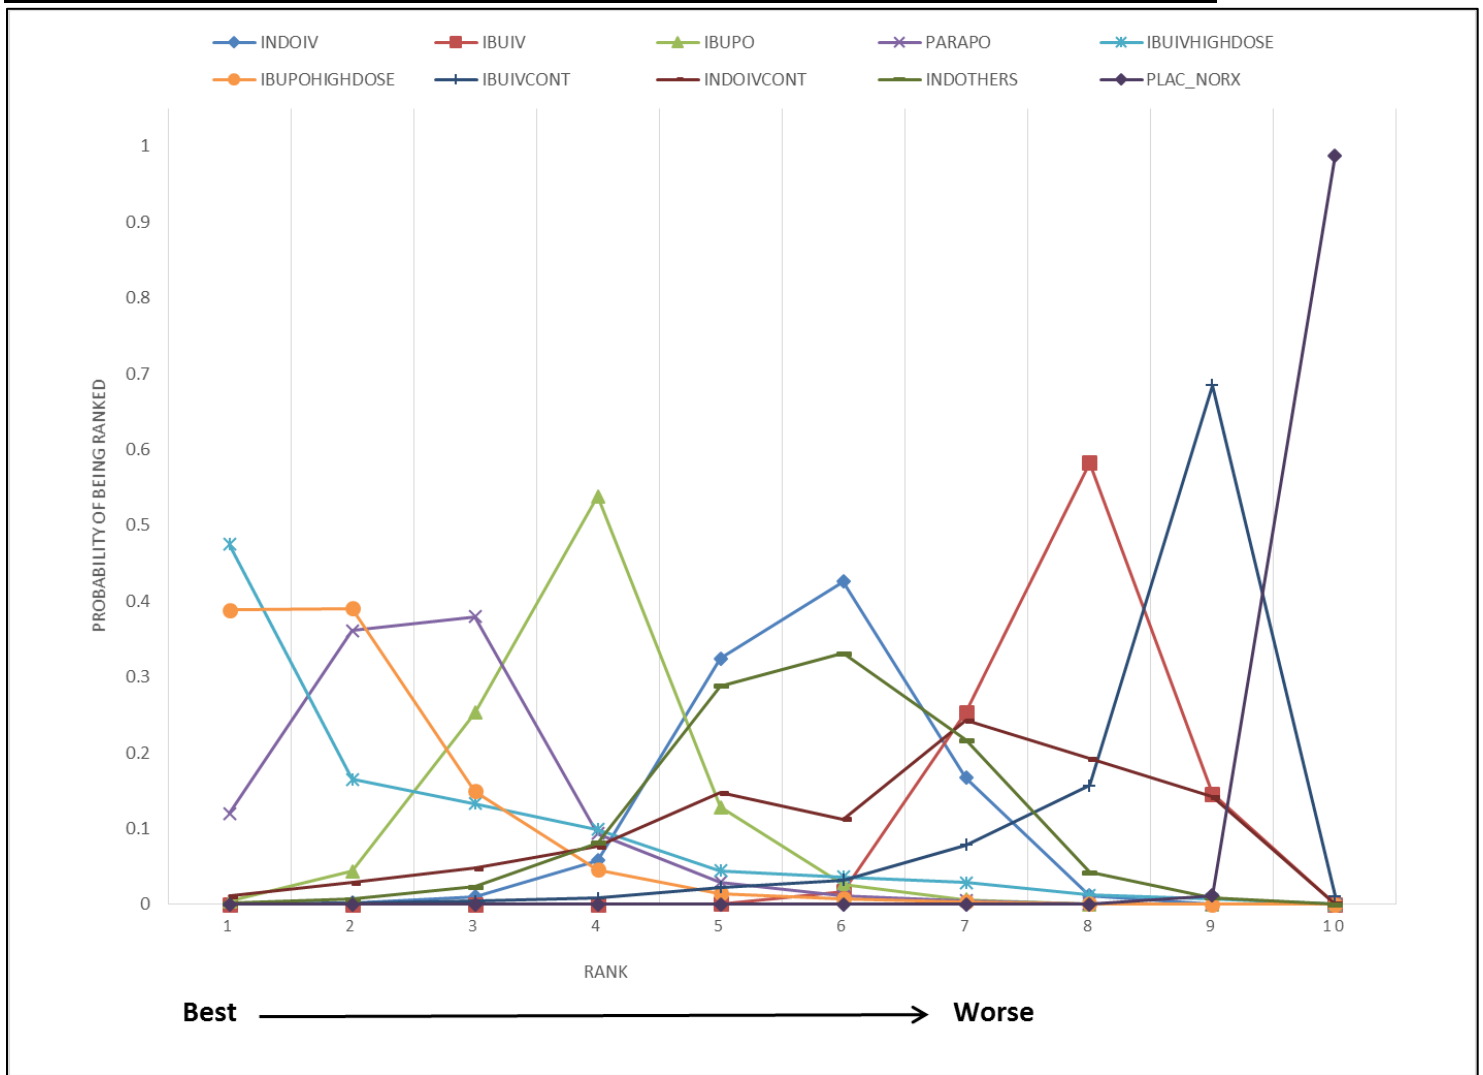

eFigure 5. Each line indicates a treatment modality. The horizontal x-axis represents the ranking of strategies in which the first through 10<sup>th</sup> modalities are ranked in numerical order, with the first representing the best strategy. The vertical y-axis represents the probability of each ranking.

**eTable 6. Ranking statistics for each treatment modality for outcome PDA closure**

| Treatment     | PDA closure                     |                                      |
|---------------|---------------------------------|--------------------------------------|
|               | SUCRA mean (Standard Deviation) | Median rank (95% Credible Intervals) |
| INDOIV        | 0.48 (0.10)                     | 6 (4-7)                              |
| IBUIV         | 0.24 (0.07)                     | 8 (7-9)                              |
| IBUPO         | 0.68 (0.10)                     | 4 (2-6)                              |
| PARAPO        | 0.82 (0.12)                     | 3 (1-5)                              |
| IBUIVHIGHDOSE | 0.84 (0.20)                     | 2 (1-7)                              |
| IBUPOHIGHDOSE | 0.89 (0.12)                     | 2 (1-5)                              |
| IBUIVCONT     | 0.17 (0.13)                     | 9 (5-9)                              |
| INDOIVCONT    | 0.40 (0.21)                     | 7 (2-9)                              |
| INDOTHERS     | 0.47 (0.13)                     | 6 (3-8)                              |
| PLAC_NORX     | 0.001 (0.012)                   | 10 (10-10)                           |



**eFigure 6. Network meta-analysis forest plots for outcome: *Need for repeat pharmacotherapy***

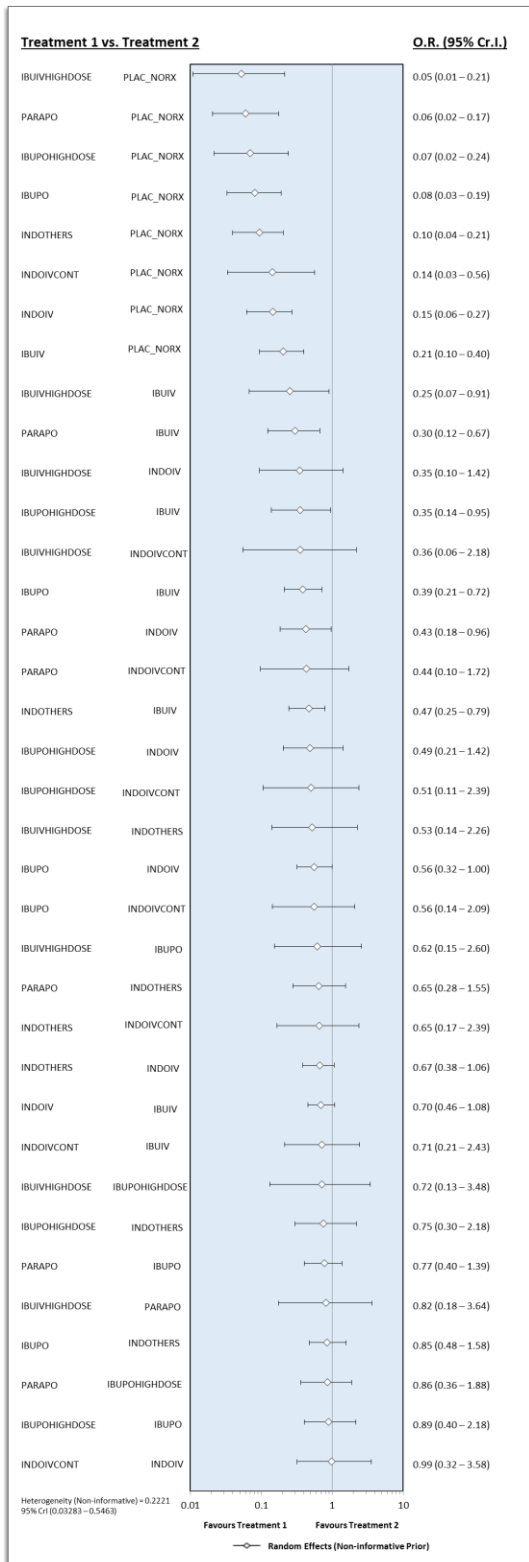

eFigure 6. Forest plot showing network effect estimates (OR with 95% credible intervals) for each possible treatment comparison in the network for need for repeat treatment computed using Bayesian RE model with non-informative priors; the horizontal axis denotes network odds ratios (with 95% credible intervals)

**eTable 7. GRADE assessment of the Quality of Evidence (QoE) for the network for need for repeat pharmacotherapy**

| <b>eTable 7. GRADE assessment of the Quality of Evidence (QoE) for the network for need for repeat pharmacotherapy</b> |                           |                                    |                                  |                     |                                         |                                           |                      |                                                            |                                                              |             |                                                             |
|------------------------------------------------------------------------------------------------------------------------|---------------------------|------------------------------------|----------------------------------|---------------------|-----------------------------------------|-------------------------------------------|----------------------|------------------------------------------------------------|--------------------------------------------------------------|-------------|-------------------------------------------------------------|
| Treatment Comparison                                                                                                   | No. of direct comparisons | Events in intervention group (n/N) | Events in comparison group (n/N) | Direct OR (95% CrI) | QoE (GRADE) based on direct comparisons | QoE (GRADE) based on indirect comparisons | Network OR (95% CrI) | Inconsistency assessment (based on node splitting p value) | Changes in GRADE assessment based on precision & effect size | Network QoE | Network absolute risk difference per 1000 infants (95% CrI) |
| <b>versus INDOIV (INDOIV)</b>                                                                                          |                           |                                    |                                  |                     |                                         |                                           |                      |                                                            |                                                              |             | ACR INDOIV 108/601 (18%)                                    |
| IBUIV                                                                                                                  | 7                         | 63/237                             | 50/281                           | 1.36(0.80-2.15)     | MODERATE                                | MODERATE                                  | 1.43(0.92-2.18)      | 0.09                                                       | None                                                         | MODERATE    | 59 more (from 12 fewer to 144 more)                         |
| IBUPO                                                                                                                  | 3                         | 7/43                               | 7/42                             | 0.96(0.34-3.65)     | LOW                                     | MODERATE                                  | 0.56(0.32-1.00)      | 0.18                                                       | None                                                         | MODERATE    | 70 fewer (from 0 fewer to 114 fewer)                        |
| PARAPO                                                                                                                 | —                         | —                                  | —                                | —                   | —                                       | LOW                                       | 0.43(0.18-0.96)      | —                                                          | None                                                         | LOW         | 94 fewer (from 6 fewer to 142 fewer)                        |
| IBUIVHIGHDOSE                                                                                                          | —                         | —                                  | —                                | —                   | —                                       | MODERATE                                  | 0.35(0.10-1.42)      | —                                                          | None                                                         | MODERATE    | 108 fewer (from 58 more to 158 fewer)                       |
| IBUPOHIGHDOSE                                                                                                          | —                         | —                                  | —                                | —                   | —                                       | LOW                                       | 0.49(0.21-1.42)      | —                                                          | None                                                         | LOW         | 83 fewer (from 58 more to 136 fewer)                        |
| INDOIVCONT                                                                                                             | —                         | —                                  | —                                | —                   | —                                       | LOW                                       | 0.99(0.32-3.58)      | —                                                          | None                                                         | LOW         | 1 fewer (from 114 fewer to 260 more)                        |
| INDOTHERS                                                                                                              | 5                         | 30/235                             | 42/235                           | 0.64(0.33-1.20)     | LOW                                     | MODERATE                                  | 0.67(0.38-1.06)      | —                                                          | None                                                         | MODERATE    | 52 fewer (from 9 more to 103 fewer)                         |
| PLAC_NORX                                                                                                              | 3                         | 30/44                              | 9/43                             | 10.02(3.73-38.24)   | MODERATE                                | MODERATE                                  | 6.87(3.66-16.03)     | 0.88                                                       | Rated up (large effect)                                      | HIGH        | 421 more (from 265 more to 599 more)                        |
| <b>versus IBUIV (IBUIV)</b>                                                                                            |                           |                                    |                                  |                     |                                         |                                           |                      |                                                            |                                                              |             | ACR IBUIV 138/534 (25.8%)                                   |
| IBUPO                                                                                                                  | 3                         | 18/124                             | 41/116                           | 0.34(0.16-0.61)     | HIGH                                    | LOW                                       | 0.39(0.21-0.72)      | 0.03                                                       | Rated down (network inconsistency)                           | MODERATE    | 139 fewer (from 58 fewer to 190 fewer)                      |
| PARAPO                                                                                                                 | —                         | —                                  | —                                | —                   | —                                       | MODERATE                                  | 0.30(0.12-0.67)      | —                                                          | None                                                         | MODERATE    | 164 fewer (from 69 fewer to 218 fewer)                      |
| IBUIVHIGHDOSE                                                                                                          | 1                         | 5/35                               | 13/35                            | 0.24(0.07-0.78)     | MODERATE                                | NOT ESTIMABLE                             | 0.25(0.07-0.91)      | NA                                                         | None                                                         | MODERATE    | 178 fewer (from 18 fewer to 235 fewer)                      |
| IBUPOHIGHDOSE                                                                                                          | —                         | —                                  | —                                | —                   | —                                       | MODERATE                                  | 0.35(0.14-0.95)      | —                                                          | None                                                         | MODERATE    | 150 fewer (from 10 fewer to 212 fewer)                      |
| INDOIVCONT                                                                                                             | 1                         | 9/31                               | 12/32                            | 0.74(0.21-2.05)     | LOW                                     | NOT ESTIMABLE                             | 0.71(0.21-2.43)      | NA                                                         | None                                                         | LOW         | 60 fewer (from 190 fewer to 200 more)                       |
| INDOTHERS                                                                                                              | —                         | —                                  | —                                | —                   | —                                       | LOW                                       | 0.47(0.25-0.79)      | —                                                          | None                                                         | LOW         | 118 fewer (from 43 fewer to 178 fewer)                      |
| PLAC_NORX                                                                                                              | 1                         | 24/51                              | 9/54                             | 5.06(1.58-14.27)    | MODERATE                                | MODERATE                                  | 4.86(2.50-10.52)     | 0.26                                                       | Rated up (large effect)                                      | HIGH        | 370 more (from 207 more to 527 more)                        |
| <b>versus IBUPO (IBUPO)</b>                                                                                            |                           |                                    |                                  |                     |                                         |                                           |                      |                                                            |                                                              |             | ACR IBUPO 104/395 (26.3%)                                   |
| PARAPO                                                                                                                 | 2                         | 31/120                             | 34/120                           | 0.92(0.47-1.76)     | MODERATE                                | MODERATE                                  | 0.77(0.40-1.39)      | 0.99                                                       | None                                                         | MODERATE    | 47 fewer (from 69 more to 138 fewer)                        |
| IBUIVHIGHDOSE                                                                                                          | —                         | —                                  | —                                | —                   | —                                       | MODERATE                                  | 0.62(0.15-2.60)      | —                                                          | None                                                         | MODERATE    | 82 fewer (from 212 fewer to 218 more)                       |
| IBUPOHIGHDOSE                                                                                                          | 1                         | 6/30                               | 10/30                            | 0.47(0.16-1.93)     | MODERATE                                | MODERATE                                  | 0.89(0.40-2.18)      | 0.38                                                       | None                                                         | MODERATE    | 22 fewer (from 138 fewer to 175 more)                       |
| INDOIVCONT                                                                                                             | —                         | —                                  | —                                | —                   | —                                       | LOW                                       | 1.79(0.48-7.00)      | —                                                          | None                                                         | LOW         | 127 more (from 117 fewer to 451 more)                       |
| INDOTHERS                                                                                                              | 3                         | 26/64                              | 35/78                            | 0.91(0.45-2.54)     | LOW                                     | VERY LOW                                  | 1.18(0.63-2.08)      | 0.89                                                       | None                                                         | LOW         | 33 more (from 80 fewer to 163 more)                         |
| PLAC_NORX                                                                                                              | —                         | —                                  | —                                | —                   | —                                       | LOW                                       | 12.24(5.25-30.54)    | —                                                          | Rated up (large effect)                                      | MODERATE    | 551 more (from 389 more to 653 more)                        |
| <b>versus PARAPO (PARAPO)</b>                                                                                          |                           |                                    |                                  |                     |                                         |                                           |                      |                                                            |                                                              |             | ACR PARAPO 43/187 (23%)                                     |
| IBUIVHIGHDOSE                                                                                                          | —                         | —                                  | —                                | —                   | —                                       | MODERATE                                  | 0.82(0.18-3.64)      | —                                                          | None                                                         | MODERATE    | 33 fewer (from 179 fewer to 291 more)                       |
| IBUPOHIGHDOSE                                                                                                          | 1                         | 17/62                              | 12/67                            | 1.95(0.69-4.69)     | MODERATE                                | MODERATE                                  | 1.16(0.53-2.76)      | 0.62                                                       | None                                                         | MODERATE    | 27 more (from 93 fewer to 222 more)                         |
| INDOIVCONT                                                                                                             | —                         | —                                  | —                                | —                   | —                                       | LOW                                       | 2.30(0.58-10.14)     | —                                                          | Rated down (imprecision)                                     | VERY LOW    | 177 more (from 82 fewer to 522 more)                        |
| INDOTHERS                                                                                                              | —                         | —                                  | —                                | —                   | —                                       | LOW                                       | 1.53(0.64-3.55)      | —                                                          | None                                                         | LOW         | 84 more (from 69 fewer to 285 more)                         |
| PLAC_NORX                                                                                                              | —                         | —                                  | —                                | —                   | —                                       | MODERATE                                  | 16.58(5.72-48.36)    | —                                                          | Rated up (large effect)                                      | HIGH        | 602 more (from 401 more to 705 more)                        |
| <b>versus IBUIVHIGHDOSE (IBUIVHIGHDOSE)</b>                                                                            |                           |                                    |                                  |                     |                                         |                                           |                      |                                                            |                                                              |             | ACR IBUIVHIGHDOSE 5/35 (14.3%)                              |
| IBUPOHIGHDOSE                                                                                                          | —                         | —                                  | —                                | —                   | —                                       | MODERATE                                  | 1.39(0.29-7.61)      | —                                                          | None                                                         | MODERATE    | 45 more (from 97 fewer to 416 more)                         |
| INDOIVCONT                                                                                                             | —                         | —                                  | —                                | —                   | —                                       | LOW                                       | 2.80(0.46-18.15)     | —                                                          | Rated down (imprecision)                                     | VERY LOW    | 175 more (from 72 fewer to 609 more)                        |
| INDOTHERS                                                                                                              | —                         | —                                  | —                                | —                   | —                                       | LOW                                       | 1.90(0.44-7.08)      | —                                                          | None                                                         | LOW         | 98 more (from 75 fewer to 398 more)                         |
| PLAC_NORX                                                                                                              | —                         | —                                  | —                                | —                   | —                                       | MODERATE                                  | 18.97(4.69-92.05)    | —                                                          | Rated up (large effect)                                      | HIGH        | 617 more (from 296 more to 796 more)                        |
| <b>versus IBUPOHIGHDOSE (IBUPOHIGHDOSE)</b>                                                                            |                           |                                    |                                  |                     |                                         |                                           |                      |                                                            |                                                              |             | ACR IBUPOHIGHDOSE 23/92 (25%)                               |
| INDOIVCONT                                                                                                             | —                         | —                                  | —                                | —                   | —                                       | LOW                                       | 1.98(0.42-9.38)      | —                                                          | None                                                         | LOW         | 148 more (from 127 fewer to 508 more)                       |
| INDOTHERS                                                                                                              | —                         | —                                  | —                                | —                   | —                                       | LOW                                       | 1.33(0.46-3.34)      | —                                                          | None                                                         | LOW         | 57 more (from 117 fewer to 277 more)                        |
| PLAC_NORX                                                                                                              | —                         | —                                  | —                                | —                   | —                                       | LOW                                       | 14.17(4.16-46.11)    | —                                                          | Rated up (large effect)                                      | MODERATE    | 575 more (from 331 more to 689 more)                        |

| <b>eTable 7. GRADE assessment of the Quality of Evidence (QoE) for the network for need for repeat pharmacotherapy</b> |                           |                                    |                                  |                     |                                         |                                           |                      |                                                            |                                                              |             |                                                             |
|------------------------------------------------------------------------------------------------------------------------|---------------------------|------------------------------------|----------------------------------|---------------------|-----------------------------------------|-------------------------------------------|----------------------|------------------------------------------------------------|--------------------------------------------------------------|-------------|-------------------------------------------------------------|
| Treatment Comparison                                                                                                   | No. of direct comparisons | Events in intervention group (n/N) | Events in comparison group (n/N) | Direct OR (95% CrI) | QoE (GRADE) based on direct comparisons | QoE (GRADE) based on indirect comparisons | Network OR (95% CrI) | Inconsistency assessment (based on node splitting p value) | Changes in GRADE assessment based on precision & effect size | Network QoE | Network absolute risk difference per 1000 infants (95% CrI) |
| <b>(Continued...)</b>                                                                                                  |                           |                                    |                                  |                     |                                         |                                           |                      |                                                            |                                                              |             |                                                             |
| <i>versus</i> INDOIVCONT (INDOIVCONT)                                                                                  |                           |                                    |                                  |                     |                                         |                                           |                      |                                                            |                                                              |             | ACR INDOIVCONT 9/31 (29%)                                   |
| INDOTHERS                                                                                                              | —                         |                                    |                                  | —                   | —                                       | LOW                                       | 0.65(0.17-2.39)      | —                                                          | None                                                         | LOW         | 80 fewer (from 204 more to 225 fewer)                       |
| PLAC_NORX                                                                                                              | —                         |                                    |                                  | —                   | —                                       | LOW                                       | 6.98(1.77-29.85)     | —                                                          | Rated up (large effect)                                      | MODERATE    | 450 more (from 130 more to 634 more)                        |
| <i>versus</i> INDOTHERS (INDOTHERS)                                                                                    |                           |                                    |                                  |                     |                                         |                                           |                      |                                                            |                                                              |             | ACR INDOTHERS 62/326 (19%)                                  |
| PLAC_NORX                                                                                                              | 2                         | 15/26                              | 6/27                             | 4.92(1.68-21.35)    | HIGH                                    | LOW                                       | 10.52(4.86-25.32)    | 0.1                                                        | None                                                         | HIGH        | 522 more (from 343 more to 666 more)                        |

Abbreviations: NA: Not Applicable; QoE: Quality of Evidence; OR: Odds Ratio; CrI: Credible Intervals; ACR: Assumed control risk

**eFigure 7. Ranking probability (rankogram) of each treatment modality for need for repeat pharmacotherapy**

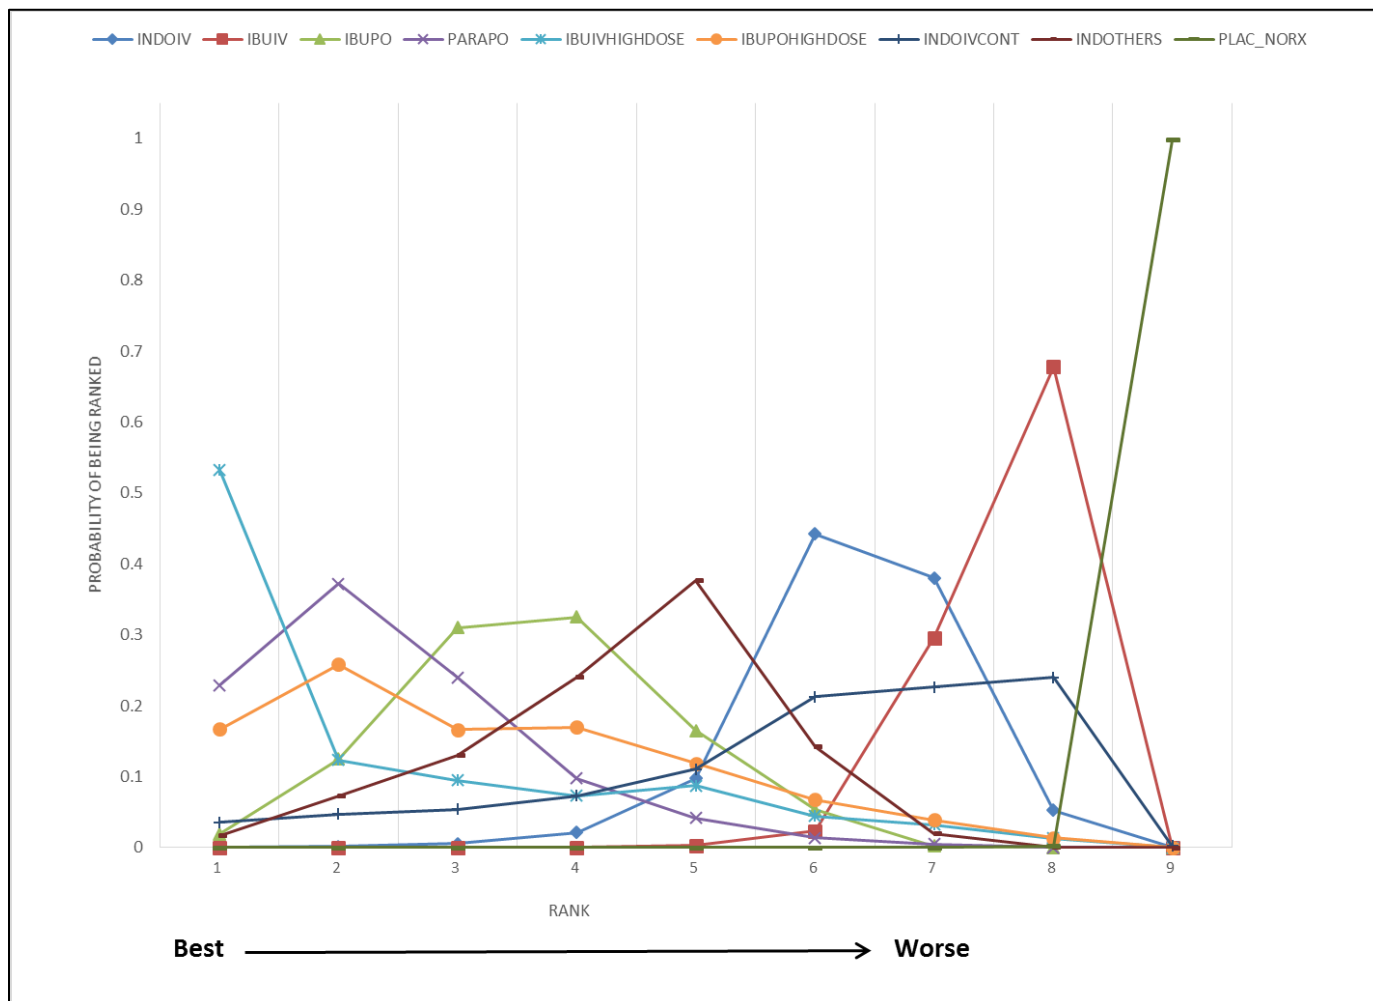

eFigure 7. Each line indicates a treatment modality. The horizontal x-axis represents the ranking of strategies in which the first through 9th modalities are ranked in numerical order, with the first representing the best strategy. The vertical y-axis represents the probability of each ranking.

**eTable 8. Ranking statistics for each treatment modality for outcome need for repeat pharmacotherapy**

| Need for repeat pharmacotherapy |                                 |                                      |
|---------------------------------|---------------------------------|--------------------------------------|
| Treatment                       | SUCRA mean (Standard Deviation) | Median rank (95% Credible Intervals) |
| INDOIV                          | 0.33 (0.11)                     | 6 (4-8)                              |
| IBUIV                           | 0.17 (0.07)                     | 8 (6-8)                              |
| IBUPO                           | 0.67 (0.14)                     | 4 (2-6)                              |
| PARAPO                          | 0.82 (0.15)                     | 2 (1-5)                              |
| IBUIVHIGHDOSE                   | 0.83 (0.24)                     | 1 (1-7)                              |
| IBUPOHIGHDOSE                   | 0.72 (0.22)                     | 3 (1-7)                              |
| INDOIVCONT                      | 0.38 (0.24)                     | 6 (1-8)                              |
| INDOTHERS                       | 0.58 (0.16)                     | 5 (2-6)                              |
| PLAC_NORX                       | 0.0003 (0.0056)                 | 9 (9-9)                              |

**eFigure 8. Network meta-analysis forest plots for outcome: *Need for surgical PDA ligation***

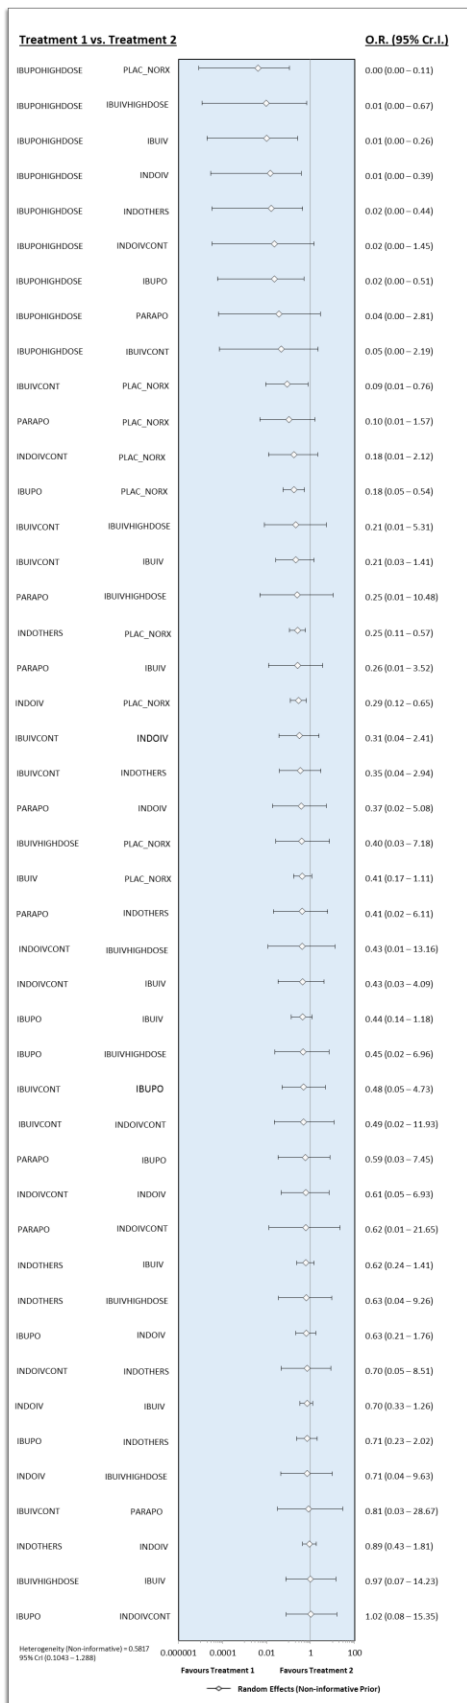

eFigure 8: Forest plot showing network effect estimates (OR with 95% credible intervals) for each possible treatment comparison in the network for need for surgical PDA ligation computed using Bayesian RE model with non-informative priors; the horizontal axis denotes network odds ratios (with 95% credible intervals)

**eTable 9. GRADE assessment of the Quality of Evidence (QoE) for the network for need for surgical PDA ligation**

| eTable 9. GRADE assessment of the Quality of Evidence (QoE) for the network for need for surgical PDA ligation |                           |                                        |                                      |                     |                                         |                                           |                      |                                                            |                                                              |             |                                                             |
|----------------------------------------------------------------------------------------------------------------|---------------------------|----------------------------------------|--------------------------------------|---------------------|-----------------------------------------|-------------------------------------------|----------------------|------------------------------------------------------------|--------------------------------------------------------------|-------------|-------------------------------------------------------------|
| Treatment Comparison                                                                                           | No. of direct comparisons | Events in the intervention group (n/N) | Events in the comparison group (n/N) | Direct OR (95% CrI) | QoE (GRADE) based on direct comparisons | QoE (GRADE) based on indirect comparisons | Network OR (95% CrI) | Inconsistency assessment (based on node splitting p value) | Changes in GRADE assessment based on precision & effect size | Network QoE | Network absolute risk difference per 1000 infants (95% CrI) |
| versus INDOIV (INDOIV)                                                                                         |                           |                                        |                                      |                     |                                         |                                           |                      |                                                            |                                                              |             | ACR INDOIV 92/767 (12%)                                     |
| IBUIV                                                                                                          | 8                         | 52/376                                 | 50/365                               | 1.15 (0.61-2.77)    | MODERATE                                | MODERATE                                  | 1.42(0.79-3.01)      | 0.56                                                       | None                                                         | MODERATE    | 42 more (from 23 fewer to 171 more)                         |
| IBUPO                                                                                                          | 1                         | 1/16                                   | 2/18                                 | 0.47 (0.01-8.65)    | LOW                                     | MODERATE                                  | 0.62(0.20-1.76)      | 0.43                                                       | None                                                         | MODERATE    | 42 fewer (from 74 more to 93 fewer)                         |
| PARAPO                                                                                                         | 1                         | 0/36                                   | 0/37                                 | 0.93 (0.00-541)     | MODERATE                                | LOW                                       | 0.37(0.01-5.08)      | 0.72                                                       | Rated down (imprecision)                                     | LOW         | 72 fewer (from 119 fewer to 289 more)                       |
| IBUIVHIGHDOSE                                                                                                  | —                         | —                                      | —                                    | —                   | —                                       | MODERATE                                  | 1.40(0.10-22.8)      | —                                                          | Rated down (imprecision)                                     | LOW         | 40 more (from 107 fewer to 637 more)                        |
| IBUPOHIGHDOSE                                                                                                  | —                         | —                                      | —                                    | —                   | —                                       | LOW                                       | 0.014(0.0-0.38)      | —                                                          | None                                                         | LOW         | 118 fewer (up to 71 fewer)*                                 |
| IBUIVCONT                                                                                                      | —                         | —                                      | —                                    | —                   | —                                       | LOW                                       | 0.30(0.03-2.41)      | —                                                          | None                                                         | LOW         | 81 fewer (from 115 fewer to 127 more)                       |
| INDOIVCONT                                                                                                     | —                         | —                                      | —                                    | —                   | LOW                                     | LOW                                       | 0.61(0.04-6.92)      | —                                                          | None                                                         | LOW         | 43 fewer (from 115 fewer to 365 more)                       |
| INDOTHERS                                                                                                      | 5                         | 42/237                                 | 37/232                               | 1.14 (0.47-2.73)    | LOW                                     | MODERATE                                  | 0.88(0.43-1.81)      | 0.56                                                       | None                                                         | MODERATE    | 13 fewer (from 65 fewer to 78 more)                         |
| PLAC_NORX                                                                                                      | 5                         | 10/119                                 | 3/115                                | 4.10 (0.83-23.68)   | MODERATE                                | MODERATE                                  | 3.49(1.53-8.34)      | 0.17                                                       | None                                                         | MODERATE    | 202 more (from 53 more to 412 more)                         |
| versus IBUIV (IBUIV)                                                                                           |                           |                                        |                                      |                     |                                         |                                           |                      |                                                            |                                                              |             | ACR IBUIV 86/715 (12%)                                      |
| IBUPO                                                                                                          | 4                         | 3/156                                  | 9/148                                | 0.26 (0.04-1.25)    | HIGH                                    | LOW                                       | 0.44(0.13-1.17)      | 0.73                                                       | None                                                         | HIGH        | 64 fewer (from 18 more to 103 fewer)                        |
| PARAPO                                                                                                         | —                         | —                                      | —                                    | —                   | —                                       | MODERATE                                  | 0.25(0.01-3.51)      | —                                                          | Rated down (imprecision)                                     | LOW         | 87 fewer (from 119 fewer to 204 more)                       |
| IBUIVHIGHDOSE                                                                                                  | 1                         | 2/35                                   | 2/35                                 | 0.98 (0.06-14.73)   | MODERATE                                | NOT ESTIMABLE                             | 0.97(0.07-14.2)      | NA                                                         | Rated down (imprecision)                                     | LOW         | 3 fewer (from 111 fewer to 540 more)                        |
| IBUPOHIGHDOSE                                                                                                  | —                         | —                                      | —                                    | —                   | —                                       | MODERATE                                  | 0.01(0.00-0.26)      | —                                                          | None                                                         | MODERATE    | 119 fewer (up to 86 fewer)*                                 |
| IBUIVCONT                                                                                                      | 1                         | 3/55                                   | 11/56                                | 0.21 (0.03-1.42)    | LOW                                     | NOT ESTIMABLE                             | 0.21(0.02-1.41)      | NA                                                         | Rated down (imprecision)                                     | VERY LOW    | 92 fewer (from 41 more to 118 fewer)                        |
| INDOIVCONT                                                                                                     | 1                         | 2/31                                   | 4/32                                 | 0.43 (0.03-4.33)    | LOW                                     | NOT ESTIMABLE                             | 0.42(0.03-4.09)      | NA                                                         | Rated down (imprecision)                                     | VERY LOW    | 66 fewer (from 116 fewer to 238 more)                       |
| INDOTHERS                                                                                                      | —                         | —                                      | —                                    | —                   | —                                       | LOW                                       | 0.62(0.23-1.41)      | —                                                          | None                                                         | LOW         | 42 fewer (from 41 more to 90 fewer)                         |
| PLAC_NORX                                                                                                      | 1                         | 9/68                                   | 8/68                                 | 1.10 (0.19-6.78)    | MODERATE                                | MODERATE                                  | 2.44(0.9-6.0)        | 0.7                                                        | None                                                         | MODERATE    | 130 more (from 11 fewer to 330 more)                        |
| versus IBUPO (IBUPO)                                                                                           |                           |                                        |                                      |                     |                                         |                                           |                      |                                                            |                                                              |             | ACR IBUPO 26/354 (7.3%)                                     |
| PARAPO                                                                                                         | 1                         | 1/40                                   | 2/40                                 | 0.39 (0.00-7.69)    | MODERATE                                | LOW                                       | 0.59(0.03-7.45)      | 0.78                                                       | Rated down (imprecision)                                     | LOW         | 29 fewer (from 71 fewer to 298 more)                        |
| IBUIVHIGHDOSE                                                                                                  | —                         | —                                      | —                                    | —                   | —                                       | MODERATE                                  | 2.22(0.14-42.88)     | —                                                          | None                                                         | MODERATE    | 76 more (from 62 fewer to 699 more)                         |
| IBUPOHIGHDOSE                                                                                                  | 1                         | 0/30                                   | 7/30                                 | 0.02 (0.00-0.47)    | MODERATE                                | NOT ESTIMABLE                             | 0.02(0.00-0.50)      | NA                                                         | None                                                         | MODERATE    | 72 fewer (up to 35 fewer)*                                  |
| IBUIVCONT                                                                                                      | —                         | —                                      | —                                    | —                   | —                                       | LOW                                       | 0.48(0.05-4.72)      | —                                                          | Rated down (imprecision)                                     | VERY LOW    | 37 fewer (from 69 fewer to 199 more)                        |
| INDOIVCONT                                                                                                     | —                         | —                                      | —                                    | —                   | —                                       | LOW                                       | 0.97(0.06-12.96)     | —                                                          | Rated down (imprecision)                                     | VERY LOW    | 2 fewer (from 69 fewer to 433 more)                         |
| INDOTHERS                                                                                                      | 1                         | 7/35                                   | 12/48                                | 0.73 (0.12-4.42)    | LOW                                     | VERY LOW                                  | 1.40(0.49-4.31)      | 0.11                                                       | None                                                         | LOW         | 26 more (from 36 fewer to 181 more)                         |
| PLAC_NORX                                                                                                      | 2                         | 8/64                                   | 1/64                                 | 11.52 (1.05-307)    | VERY LOW                                | LOW                                       | 5.54(1.86-18.2)      | 0.99                                                       | Rated down (imprecision)                                     | VERY LOW    | 232 more (from 55 more to 517 more)                         |
| versus PARAPO (PARAPO)                                                                                         |                           |                                        |                                      |                     |                                         |                                           |                      |                                                            |                                                              |             | ACR PARAPO 1/76 (1.3%)                                      |
| IBUIVHIGHDOSE                                                                                                  | —                         | —                                      | —                                    | —                   | —                                       | MODERATE                                  | 3.96(0.09-199.3)     | —                                                          | Rated down (imprecision)                                     | LOW         | 37 more (from 12 fewer to 713 more)                         |
| IBUPOHIGHDOSE                                                                                                  | —                         | —                                      | —                                    | —                   | —                                       | LOW                                       | 0.03(0.00-2.80)      | —                                                          | Rated down (imprecision)                                     | VERY LOW    | 13 fewer (from – to 23 more)*                               |
| IBUIVCONT                                                                                                      | —                         | —                                      | —                                    | —                   | —                                       | LOW                                       | 0.81(0.03-28.6)      | —                                                          | Rated down (imprecision)                                     | VERY LOW    | 2 fewer (from 13 fewer to 263 more)                         |
| INDOIVCONT                                                                                                     | —                         | —                                      | —                                    | —                   | —                                       | LOW                                       | 1.61(0.04-77.34)     | —                                                          | Rated down (imprecision)                                     | VERY LOW    | 8 more (from 13 fewer to 495 more)                          |
| INDOTHERS                                                                                                      | —                         | —                                      | —                                    | —                   | —                                       | LOW                                       | 2.41(0.16-48.33)     | —                                                          | Rated down (imprecision)                                     | VERY LOW    | 18 more (from 11 fewer to 379 more)                         |
| PLAC_NORX                                                                                                      | —                         | —                                      | —                                    | —                   | —                                       | MODERATE                                  | 9.54(0.63-197.9)     | —                                                          | Rated down (imprecision)                                     | LOW         | 100 more (from 5 fewer to 712 more)                         |

| <b>eTable 9. GRADE assessment of the Quality of Evidence (QoE) for the network for need for surgical PDA ligation</b> |                           |                                        |                                      |                     |                                         |                                           |                      |                                                            |                                                              |             |                                                             |
|-----------------------------------------------------------------------------------------------------------------------|---------------------------|----------------------------------------|--------------------------------------|---------------------|-----------------------------------------|-------------------------------------------|----------------------|------------------------------------------------------------|--------------------------------------------------------------|-------------|-------------------------------------------------------------|
| Treatment Comparison                                                                                                  | No. of direct comparisons | Events in the intervention group (n/N) | Events in the comparison group (n/N) | Direct OR (95% CrI) | QoE (GRADE) based on direct comparisons | QoE (GRADE) based on indirect comparisons | Network OR (95% CrI) | Inconsistency assessment (based on node splitting p value) | Changes in GRADE assessment based on precision & effect size | Network QoE | Network absolute risk difference per 1000 infants (95% CrI) |
| <b>(....Continued)</b>                                                                                                |                           |                                        |                                      |                     |                                         |                                           |                      |                                                            |                                                              |             |                                                             |
| <i>versus</i> IBUIVHIGHDOSE (IBUIVHIGHDOSE)                                                                           |                           |                                        |                                      |                     |                                         |                                           |                      |                                                            |                                                              |             | ACR IBUIVHIGHDOSE 2/35 (5.7%)                               |
| IBUPOHIGHDOSE                                                                                                         | —                         |                                        |                                      | —                   | —                                       | MODERATE                                  | 0.01(0.00-0.67)      | —                                                          | None                                                         | MODERATE    | 57 fewer (up to 18 fewer)*                                  |
| IBUIVCONT                                                                                                             | —                         |                                        |                                      | —                   | —                                       | LOW                                       | 0.20(0.00-5.3)       | —                                                          | Rated down (imprecision)                                     | VERY LOW    | 45 fewer (from — to 186 more)*                              |
| INDOIVCONT                                                                                                            | —                         |                                        |                                      | —                   | —                                       | LOW                                       | 0.421(0.01-13.16)    | —                                                          | Rated down (imprecision)                                     | VERY LOW    | 32 fewer (from 57 fewer to 387 more)                        |
| INDOTHERS                                                                                                             | —                         |                                        |                                      | —                   | —                                       | LOW                                       | 0.62(0.03-9.25)      | —                                                          | Rated down (imprecision)                                     | VERY LOW    | 21 fewer (from 55 fewer to 302 more)                        |
| PLAC_NORX                                                                                                             | —                         |                                        |                                      | —                   | —                                       | MODERATE                                  | 2.49(0.13-37.36)     | —                                                          | Rated down (imprecision)                                     | LOW         | 74 more (from 49 fewer to 637 more)                         |
| <i>versus</i> IBUPOHIGHDOSE (IBUPOHIGHDOSE)                                                                           |                           |                                        |                                      |                     |                                         |                                           |                      |                                                            |                                                              |             | ACR IBUPOHIGHDOSE 0/30 (0%) **                              |
| IBUIVCONT                                                                                                             | —                         |                                        |                                      | —                   | —                                       | LOW                                       | 21.75(0.456-14340)   | —                                                          | Rated down (imprecision)                                     | VERY LOW    | 253 more (from 9 fewer to 979 more)                         |
| INDOIVCONT                                                                                                            | —                         |                                        |                                      | —                   | —                                       | LOW                                       | 44.04(0.68-30690)    | —                                                          | Rated down (imprecision)                                     | VERY LOW    | 411 more (from 5 fewer to 981 more)                         |
| INDOTHERS                                                                                                             | —                         |                                        |                                      | —                   | —                                       | LOW                                       | 61.43(2.27-30340)    | —                                                          | Rated up (large effect)                                      | MODERATE    | 493 more (from 20 more to 981 more)                         |
| PLAC_NORX                                                                                                             | —                         |                                        |                                      | —                   | —                                       | LOW                                       | 242.4(9.11-122400)   | —                                                          | Rated up (large effect)                                      | MODERATE    | 788 more (from 117 more to 983 more)                        |
| <i>versus</i> IBUIVCONT (IBUIVCONT)                                                                                   |                           |                                        |                                      |                     |                                         |                                           |                      |                                                            |                                                              |             | ACR IBUIVCONT 3/55 (5.5%)                                   |
| INDOIVCONT                                                                                                            | —                         |                                        |                                      | —                   | —                                       | LOW                                       | 2.042(0.08-43.79)    | —                                                          | Rated down (imprecision)                                     | VERY LOW    | 51 more (from 50 fewer to 662 more)                         |
| INDOTHERS                                                                                                             | —                         |                                        |                                      | —                   | —                                       | LOW                                       | 2.894(0.33-25.56)    | —                                                          | Rated down (imprecision)                                     | VERY LOW    | 88 more (from 36 fewer to 541 more)                         |
| PLAC_NORX                                                                                                             | —                         |                                        |                                      | —                   | —                                       | LOW                                       | 11.55(1.32-106.2)    | —                                                          | Rated down (imprecision)                                     | VERY LOW    | 354 more (from 16 more to 805 more)                         |
| <i>versus</i> INDOIVCONT (INDOIVCONT)                                                                                 |                           |                                        |                                      |                     |                                         |                                           |                      |                                                            |                                                              |             | ACR INDOIVCONT 2/31 (6.5%)                                  |
| INDOTHERS                                                                                                             | —                         |                                        |                                      | —                   | —                                       | LOW                                       | 1.428(0.11-21.0)     | —                                                          | Rated down (imprecision)                                     | VERY LOW    | 25 more (from 57 fewer to 527 more)                         |
| PLAC_NORX                                                                                                             | —                         |                                        |                                      | —                   | —                                       | LOW                                       | 5.677(0.47-81.8)     | —                                                          | Rated down (imprecision)                                     | VERY LOW    | 217 more (from 33 fewer to 785 more)                        |
| <i>versus</i> INDOTHERS (INDOTHERS)                                                                                   |                           |                                        |                                      |                     |                                         |                                           |                      |                                                            |                                                              |             | ACR INDOTHERS 61/345 (17.7%)                                |
| PLAC_NORX                                                                                                             | 4                         | 33/70                                  | 12/73                                | 5.15 (1.64-14.61)   | HIGH                                    | LOW                                       | 3.96 (1.75-9.0)      | 0.14                                                       | None                                                         | VERY LOW    | 283 more (from 96 more to 482 more)                         |

Abbreviations: NA: Not Applicable; QoE: Quality of Evidence; OR: Odds Ratio; CrI: Credible Intervals; ACR: Assumed control risk  
 \*The lower limit of the 95% credible interval for absolute risk difference could not be computed due to the very low (tending to zero) lower limit of the 95% credible interval for the corresponding network odds ratio  
 \*\*In view of zero event rate for the particular outcome in the control group, a continuity correction of 0.5 has been applied to calculate the assumed control risk in order to compute the absolute risk difference (16).

**eFigure 9. Ranking probability (rankogram) of each treatment modality for need for surgical PDA ligation**

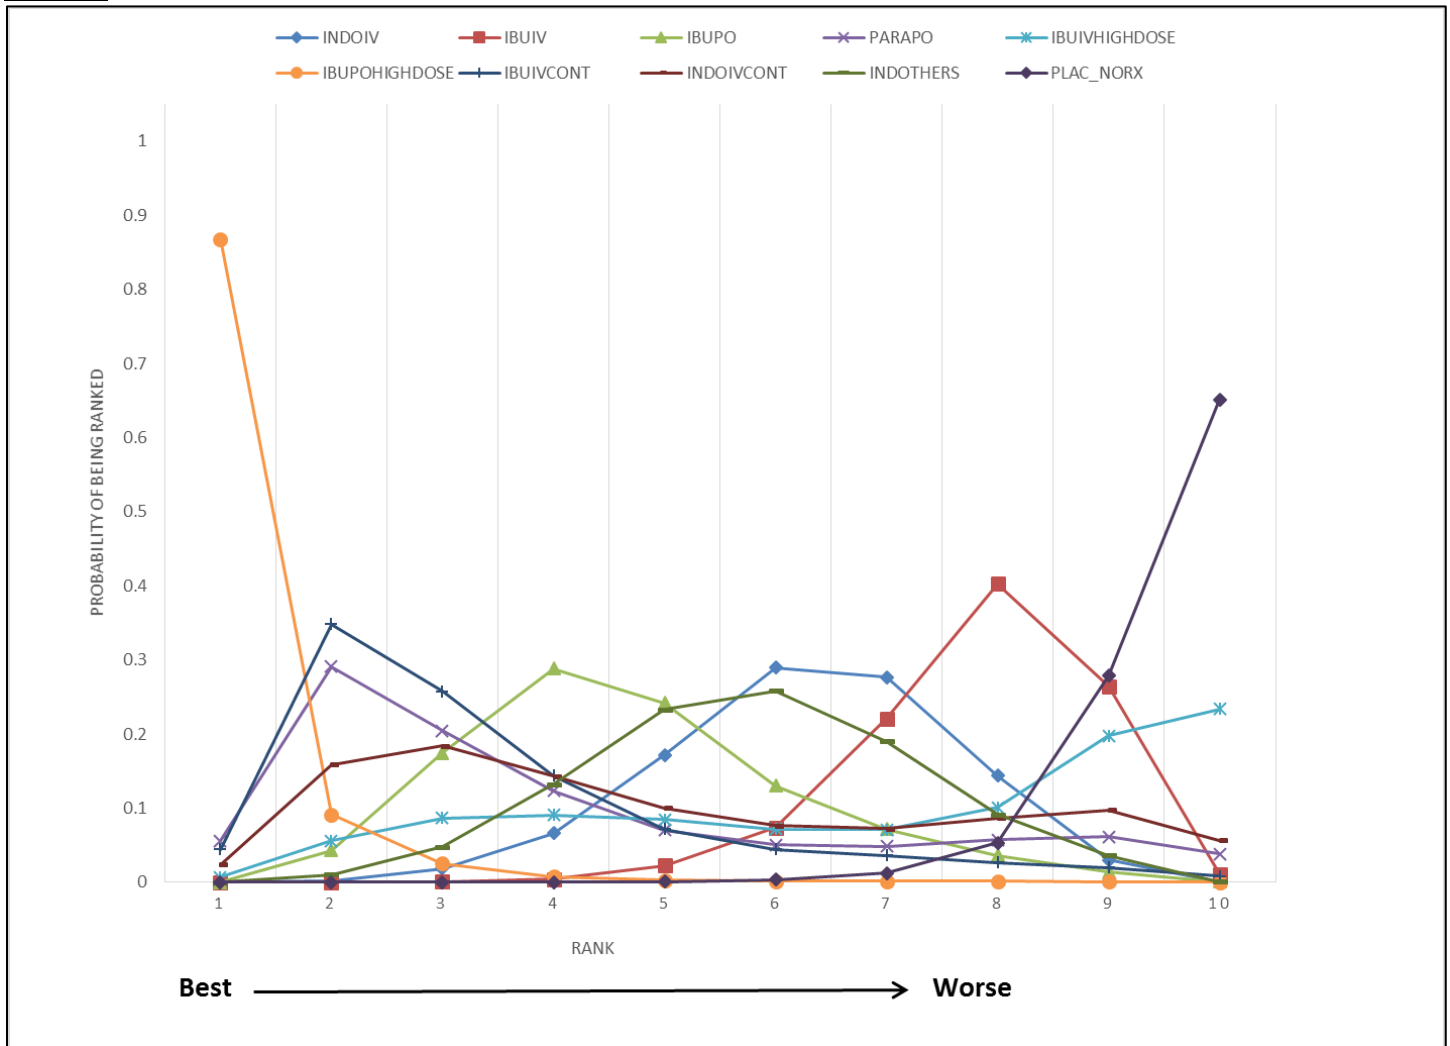

eFigure 9. Each line indicates a treatment modality. The horizontal x-axis represents the ranking of strategies in which the first through 10<sup>th</sup> modalities are ranked in numerical order, with the first representing the best strategy. The vertical y-axis represents the probability of each ranking.

**eTable 10. Ranking statistics for each treatment modality for need for surgical PDA ligation**

| Need for surgical PDA ligation |                                 |                                      |
|--------------------------------|---------------------------------|--------------------------------------|
| Treatment                      | SUCRA mean (Standard Deviation) | Median rank (95% Credible intervals) |
| INDOIV                         | 0.41 (0.14)                     | 6 (4-9)                              |
| IBUIV                          | 0.24 (0.12)                     | 8 (5-9)                              |
| IBUPO                          | 0.59 (0.17)                     | 4 (2-8)                              |
| PARAPO                         | 0.65 (0.28)                     | 3 (1-10)                             |
| IBUIVHIGHDOSE                  | 0.33 (0.30)                     | 8 (2-10)                             |
| IBUPOHIGHDOSE                  | 0.98 (0.08)                     | 1 (1-3)                              |
| IBUIVCONT                      | 0.73 (0.21)                     | 3 (1-9)                              |
| INDOIVCONT                     | 0.55 (0.29)                     | 4 (2-10)                             |
| INDOTHERS                      | 0.47 (0.17)                     | 6 (3-9)                              |
| PLAC_NORX                      | 0.05 (0.08)                     | 10 (8-10)                            |



**eFigure 10. Network meta-analysis forest plots for outcome: Neonatal Mortality**

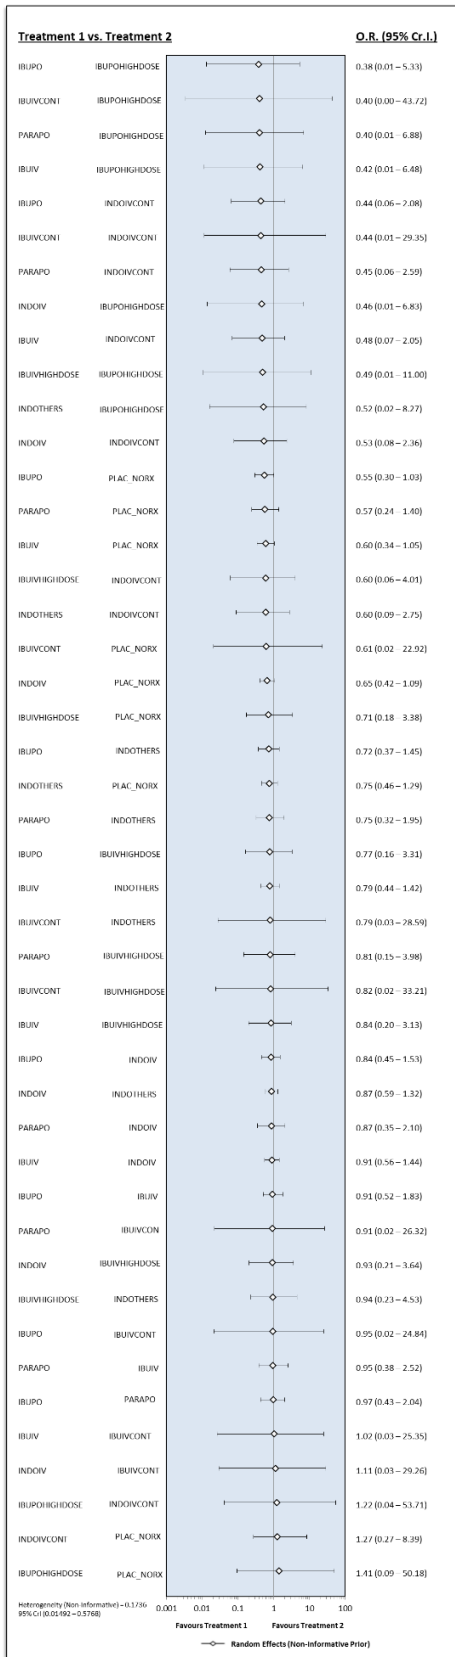

eFigure 10. Forest plot showing network effect estimates (OR with 95% credible intervals) for each possible treatment comparison in the network for neonatal mortality computed using Bayesian RE model with non-informative priors; the horizontal axis denotes network odds ratios (with 95% credible intervals)

**eTable 11. GRADE assessment of the Quality of Evidence (QoE) for the network for Neonatal Mortality**

| eTable 11. GRADE assessment of the Quality of Evidence (QoE) for the network for Neonatal Mortality |                           |                                        |                                      |                     |                                         |                                           |                      |                                                            |                                                              |             |                                                             |
|-----------------------------------------------------------------------------------------------------|---------------------------|----------------------------------------|--------------------------------------|---------------------|-----------------------------------------|-------------------------------------------|----------------------|------------------------------------------------------------|--------------------------------------------------------------|-------------|-------------------------------------------------------------|
| Treatment Comparison                                                                                | No. of direct comparisons | Events in the intervention group (n/N) | Events in the comparison group (n/N) | Direct OR (95% CrI) | QoE (GRADE) based on direct comparisons | QoE (GRADE) based on indirect comparisons | Network OR (95% CrI) | Inconsistency assessment (based on node splitting p value) | Changes in GRADE assessment based on precision & effect size | Network QoE | Network absolute risk difference per 1000 infants (95% CrI) |
| <i>versus</i> INDOIV (INDOIV)                                                                       |                           |                                        |                                      |                     |                                         |                                           |                      |                                                            |                                                              |             | ACR INDO IV 111/904 (12.3%)                                 |
| IBUIV                                                                                               | 6                         | 29/303                                 | 29/289                               | 0.90 (0.49-1.65)    | MODERATE                                | MODERATE                                  | 0.91(0.56-1.44)      | 0.56                                                       | None                                                         | MODERATE    | 10 fewer (from 45 more to 50 fewer)                         |
| IBUPO                                                                                               | 3                         | 4/40                                   | 5/42                                 | 0.68(0.12-3.57)     | LOW                                     | MODERATE                                  | 0.84(0.45-1.53)      | 0.43                                                       | None                                                         | MODERATE    | 18 fewer (from 54 more to 64 fewer)                         |
| PARAPO                                                                                              | 1                         | 8/38                                   | 8/39                                 | 0.99 (0.28-3.49)    | MODERATE                                | LOW                                       | 0.87(0.35-2.10)      | 0.72                                                       | None                                                         | MODERATE    | 14 fewer (from 76 fewer to 104 more)                        |
| IBUIVHIGHDOSE                                                                                       | —                         |                                        |                                      | —                   | —                                       | MODERATE                                  | 1.07(0.27-4.81)      | —                                                          | None                                                         | MODERATE    | 7 more (from 86 fewer to 280 more)                          |
| IBUPOHIGHDOSE                                                                                       | —                         |                                        |                                      | —                   | —                                       | LOW                                       | 2.19(0.15-72.38)     | —                                                          | Rated down (Imprecision)                                     | VERY LOW    | 112 more (from 102 fewer to 787 more)                       |
| IBUIVCONT                                                                                           | —                         |                                        |                                      | —                   | —                                       | LOW                                       | 0.90(0.03-33.65)     | —                                                          | Rated down (Imprecision)                                     | VERY LOW    | 11 fewer (from 119 fewer to 702 more)                       |
| INDOIVCONT                                                                                          | 1                         | 2/18                                   | 0/14                                 | 1.89 (0.74-8.89)    | LOW                                     | LOW                                       | 1.89(0.42-12.82)     | 0.66                                                       | Rated down (Imprecision)                                     | VERY LOW    | 86 more (from 67 fewer to 519 more)                         |
| INDOTHERS                                                                                           | 7                         | 52/359                                 | 42/358                               | 1.31(0.79-2.13)     | LOW                                     | MODERATE                                  | 1.15(0.76-1.70)      | 0.2                                                        | None                                                         | MODERATE    | 16 more (from 27 fewer to 69 more)                          |
| PLAC_NORX                                                                                           | 7                         | 30/169                                 | 27/162                               | 1.11 (0.58-2.11)    | MODERATE                                | MODERATE                                  | 1.53(0.92-2.36)      | 0.17                                                       | None                                                         | MODERATE    | 54 more (from 9 fewer to 126 more)                          |
| <i>versus</i> IBUIV (IBUIV)                                                                         |                           |                                        |                                      |                     |                                         |                                           |                      |                                                            |                                                              |             | ACR IBUIV 60/664 (9%)                                       |
| IBUPO                                                                                               | 3                         | 13/120                                 | 10/116                               | 1.41 (0.51-3.99)    | HIGH                                    | LOW                                       | 0.91(0.52-1.83)      | 0.73                                                       | None                                                         | LOW         | 7 fewer (from 41 fewer to 63 more)                          |
| PARAPO                                                                                              | —                         |                                        |                                      | —                   | —                                       | MODERATE                                  | 0.95(0.38-2.52)      | —                                                          | None                                                         | MODERATE    | 4 fewer (from 54 fewer to 110 more)                         |
| IBUIVHIGHDOSE                                                                                       | 1                         | 6/35                                   | 5/35                                 | 1.24 (0.31-5.35)    | MODERATE                                | NOT ESTIMABLE                             | 1.20(0.32-5.06)      | NA                                                         | None                                                         | MODERATE    | 16 more (from 60 fewer to 244 more)                         |
| IBUPOHIGHDOSE                                                                                       | —                         |                                        |                                      | —                   | —                                       | MODERATE                                  | 2.39(0.15-88.03)     | —                                                          | Rated down (Imprecision)                                     | LOW         | 102 more (from 76 fewer to 807 more)                        |
| IBUIVCONT                                                                                           | 1                         | 1/55                                   | 1/56                                 | 0.93 (0.03-24.45)   | LOW                                     | NOT ESTIMABLE                             | 0.98(0.04-38.00)     | NA                                                         | Rated down (Imprecision)                                     | VERY LOW    | 2 fewer (from 86 fewer to 700 more)                         |
| INDOIVCONT                                                                                          | 1                         | 4/31                                   | 3/32                                 | 1.36 (0.26-8.44)    | LOW                                     | LOW                                       | 2.09(0.49-14.65)     | 0.78                                                       | Rated down (Imprecision)                                     | VERY LOW    | 82 more (from 44 fewer to 502 more)                         |
| INDOTHERS                                                                                           | —                         |                                        |                                      | —                   | —                                       | LOW                                       | 1.27(0.70-2.25)      | —                                                          | None                                                         | LOW         | 22 more (from 25 fewer to 92 more)                          |
| PLAC_NORX                                                                                           | 2                         | 16/119                                 | 12/122                               | 1.45 (0.59-3.46)    | MODERATE                                | MODERATE                                  | 1.67(0.95-2.92)      | 0.7                                                        | None                                                         | MODERATE    | 52 more (from 4 fewer to 134 more)                          |
| <i>versus</i> IBUPO (IBUPO)                                                                         |                           |                                        |                                      |                     |                                         |                                           |                      |                                                            |                                                              |             | ACR IBUPO 43/484 (8.9%)                                     |
| PARAPO                                                                                              | 2                         | 13/120                                 | 14/120                               | 0.92 (0.36-2.49)    | MODERATE                                | LOW                                       | 1.03(0.49-2.34)      | 0.78                                                       | None                                                         | LOW         | 2 more (from 43 fewer to 97 more)                           |
| IBUIVHIGHDOSE                                                                                       | —                         |                                        |                                      | —                   | —                                       | MODERATE                                  | 1.30(0.30-6.08)      | —                                                          | None                                                         | MODERATE    | 24 more (from 60 fewer to 283 more)                         |
| IBUPOHIGHDOSE                                                                                       | 1                         | 2/30                                   | 1/30                                 | 2.59 (0.25-42.94)   | MODERATE                                | NOT ESTIMABLE                             | 2.61(0.19-76.13)     | NA                                                         | Rated down (Imprecision)                                     | LOW         | 114 more (from 71 fewer to 792 more)                        |
| IBUIVCONT                                                                                           | —                         |                                        |                                      | —                   | —                                       | LOW                                       | 1.05(0.04-46.64)     | —                                                          | Rated down (Imprecision)                                     | VERY LOW    | 4 more (from 85 fewer to 731 more)                          |
| INDOIVCONT                                                                                          | —                         |                                        |                                      | —                   | —                                       | LOW                                       | 2.30(0.48-15.43)     | —                                                          | Rated down (Imprecision)                                     | VERY LOW    | 94 more (from 44 fewer to 512 more)                         |
| INDOTHERS                                                                                           | 3                         | 8/64                                   | 3/78                                 | 3.92 (1.03-17.37)   | LOW                                     | VERY LOW                                  | 1.38(0.69-2.70)      | 0.01                                                       | Rated down (Incoherence)                                     | VERY LOW    | 30 more (from 26 fewer to 120 more)                         |
| PLAC_NORX                                                                                           | 3                         | 12/96                                  | 8/96                                 | 1.62 (0.60-4.68)    | VERY LOW                                | LOW                                       | 1.81(0.97-3.31)      | 0.99                                                       | None                                                         | LOW         | 61 more (from 2 fewer to 155 more)                          |
| <i>versus</i> PARAPO (PARAPO)                                                                       |                           |                                        |                                      |                     |                                         |                                           |                      |                                                            |                                                              |             | ACR PARAPO 21/158 (13.3%)                                   |
| IBUIVHIGHDOSE                                                                                       | —                         |                                        |                                      | —                   | —                                       | MODERATE                                  | 1.24(0.25-6.83)      | —                                                          | None                                                         | MODERATE    | 27 more (from 96 fewer to 379 more)                         |
| IBUPOHIGHDOSE                                                                                       | —                         |                                        |                                      | —                   | —                                       | LOW                                       | 2.47(0.15-80.63)     | —                                                          | Rated down (Imprecision)                                     | VERY LOW    | 142 more (from 110 fewer to 792 more)                       |
| IBUIVCONT                                                                                           | —                         |                                        |                                      | —                   | —                                       | LOW                                       | 1.09(0.04-45.81)     | —                                                          | Rated down (Imprecision)                                     | VERY LOW    | 10 more (from 127 fewer to 742 more)                        |
| INDOIVCONT                                                                                          | —                         |                                        |                                      | —                   | —                                       | LOW                                       | 2.20(0.39-16.46)     | —                                                          | Rated down (Imprecision)                                     | VERY LOW    | 119 more (from 77 fewer to 583 more)                        |
| INDOTHERS                                                                                           | —                         |                                        |                                      | —                   | —                                       | LOW                                       | 1.33(0.51-3.09)      | —                                                          | None                                                         | LOW         | 36 more (from 60 fewer to 189 more)                         |
| PLAC_NORX                                                                                           | —                         |                                        |                                      | —                   | —                                       | MODERATE                                  | 1.74(0.72-4.16)      | —                                                          | None                                                         | MODERATE    | 78 more (from 34 fewer to 256 more)                         |

**eTable 11. GRADE assessment of the Quality of Evidence (QoE) for the network for Neonatal Mortality**

| Treatment Comparison                        | No. of direct comparisons | Events in the intervention group (n/N) | Events in the comparison group (n/N) | Direct OR (95% CrI) | QoE (GRADE) based on direct comparisons | QoE (GRADE) based on indirect comparisons | Network OR (95% CrI) | Inconsistency assessment (based on node splitting p value) | Changes in GRADE assessment based on precision & effect size | Network QoE | Network absolute risk difference per 1000 infants (95% CrI) |
|---------------------------------------------|---------------------------|----------------------------------------|--------------------------------------|---------------------|-----------------------------------------|-------------------------------------------|----------------------|------------------------------------------------------------|--------------------------------------------------------------|-------------|-------------------------------------------------------------|
| <b>(...continued)</b>                       |                           |                                        |                                      |                     |                                         |                                           |                      |                                                            |                                                              |             |                                                             |
| <i>versus</i> IBUIVHIGHDOSE (IBUIVHIGHDOSE) |                           |                                        |                                      |                     |                                         |                                           |                      |                                                            |                                                              |             |                                                             |
| IBUPOHIGHDOSE                               | —                         |                                        |                                      | —                   | —                                       | MODERATE                                  | 2.04(0.09-92.38)     | —                                                          | Rated down (Imprecision)                                     | LOW         | 125 more (from 153 fewer to 779 more)                       |
| IBUIVCONT                                   | —                         |                                        |                                      | —                   | —                                       | LOW                                       | 0.82(0.02-33.21)     | —                                                          | Rated down (Imprecision)                                     | VERY LOW    | 26 fewer (from 167 fewer to 702 more)                       |
| INDOIVCONT                                  | —                         |                                        |                                      | —                   | —                                       | LOW                                       | 1.67(0.25-16.18)     | —                                                          | Rated down (Imprecision)                                     | VERY LOW    | 85 more (from 122 fewer to 599 more)                        |
| INDOTHERS                                   | —                         |                                        |                                      | —                   | —                                       | LOW                                       | 1.07(0.22-4.31)      | —                                                          | None                                                         | VERY LOW    | 10 more (from 128 fewer to 300 more)                        |
| PLAC_NORX                                   | —                         |                                        |                                      | —                   | —                                       | MODERATE                                  | 1.40(0.30-5.71)      | —                                                          | None                                                         | MODERATE    | 53 more (from 113 fewer to 370 more)                        |
| <i>versus</i> IBUPOHIGHDOSE (IBUPOHIGHDOSE) |                           |                                        |                                      |                     |                                         |                                           |                      |                                                            |                                                              |             |                                                             |
| IBUIVCONT                                   | —                         |                                        |                                      | —                   | —                                       | LOW                                       | 0.40(0.00-43.72)     | —                                                          | Rated down (Imprecision)                                     | VERY LOW    | 39 fewer (from – to 691 more)*                              |
| INDOIVCONT                                  | —                         |                                        |                                      | —                   | —                                       | LOW                                       | 0.82(0.02-24.35)     | —                                                          | Rated down (Imprecision)                                     | VERY LOW    | 11 fewer (from 65 fewer to 568 more)                        |
| INDOTHERS                                   | —                         |                                        |                                      | —                   | —                                       | LOW                                       | 0.52(0.02-8.27)      | —                                                          | None                                                         | LOW         | 31 fewer (from 65 fewer to 305 more)                        |
| PLAC_NORX                                   | —                         |                                        |                                      | —                   | —                                       | LOW                                       | 0.71(0.02-10.63)     | —                                                          | Rated down (Imprecision)                                     | VERY LOW    | 18 fewer (from 65 fewer to 365 more)                        |
| <i>versus</i> IBUIVCONT (IBUIVCONT)         |                           |                                        |                                      |                     |                                         |                                           |                      |                                                            |                                                              |             |                                                             |
| INDOIVCONT                                  | —                         |                                        |                                      | —                   | —                                       | LOW                                       | 2.26(0.03-87.92)     | —                                                          | Rated down (Imprecision)                                     | VERY LOW    | 22 more (from 18 fewer to 601 more)                         |
| INDOTHERS                                   | —                         |                                        |                                      | —                   | —                                       | LOW                                       | 1.27(0.03-36.40)     | —                                                          | Rated down (Imprecision)                                     | VERY LOW    | 5 more (from 18 fewer to 384 more)                          |
| PLAC_NORX                                   | —                         |                                        |                                      | —                   | —                                       | LOW                                       | 1.64(0.04-48.25)     | —                                                          | Rated down (Imprecision)                                     | VERY LOW    | 11 more (from 17 fewer to 454 more)                         |
| <i>versus</i> INDOIVCONT (INDOIVCONT)       |                           |                                        |                                      |                     |                                         |                                           |                      |                                                            |                                                              |             |                                                             |
| INDOTHERS                                   | —                         |                                        |                                      | —                   | —                                       | LOW                                       | 0.60(0.09-2.75)      | —                                                          | None                                                         | LOW         | 7 fewer (from 17 fewer to 30 more)                          |
| PLAC_NORX                                   | —                         |                                        |                                      | —                   | —                                       | LOW                                       | 0.78(0.12-3.71)      | —                                                          | None                                                         | LOW         | 4 fewer (from 16 fewer to 46 more)                          |
| <i>versus</i> INDOTHERS (INDOTHERS)         |                           |                                        |                                      |                     |                                         |                                           |                      |                                                            |                                                              |             |                                                             |
| PLAC_NORX                                   | 4                         | 21/70                                  | 9/73                                 | 3.15 (1.24-8.26)    | HIGH                                    | LOW                                       | 1.33(0.78-2.19)      | 0.14                                                       | None                                                         | LOW         | 38 more (from 27 fewer to 122 more)                         |

Abbreviations: NA: Not Applicable; QoE: Quality of Evidence; OR: Odds Ratio; CrI: Credible Intervals; ACR: Assumed control risk

\*The lower limit of the 95% credible interval for absolute risk difference could not be computed due to the very low (tending to zero) lower limit of the 95% credible interval for the corresponding network odds ratio

**eFigure 11. Ranking probability (rankogram) of each treatment modality for Neonatal Mortality**

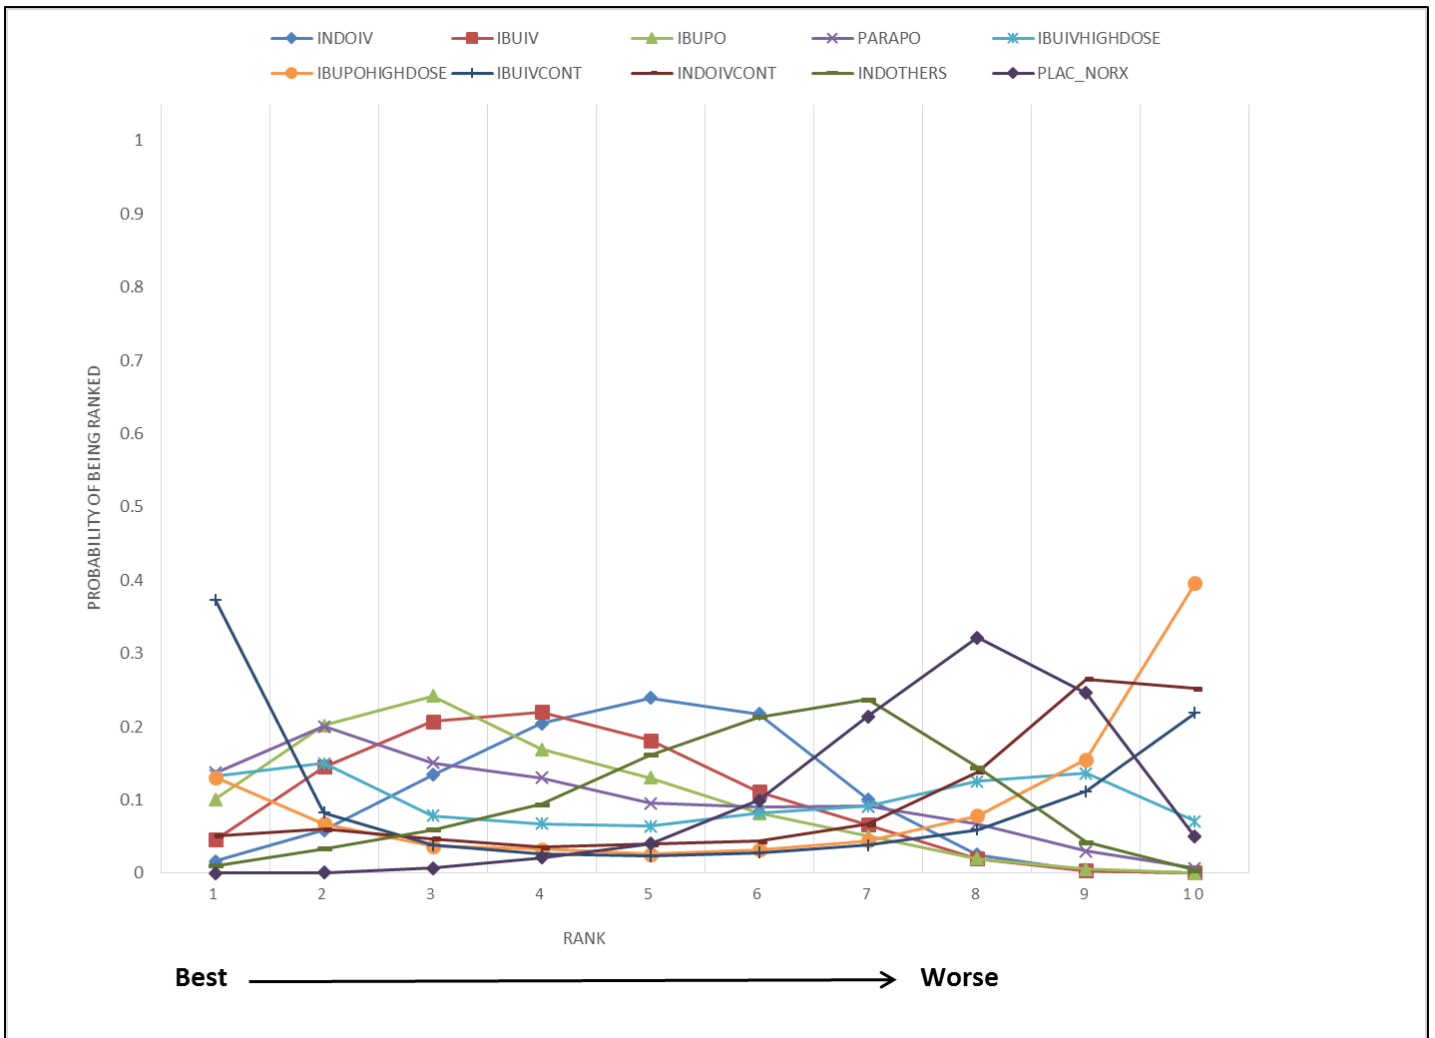

eFigure 11. Each line indicates a treatment modality. The horizontal x-axis represents the ranking of strategies in which the first through 10<sup>th</sup> modalities are ranked in numerical order, with the first representing the best strategy. The vertical y-axis represents the probability of each ranking.

**eTable 12. Ranking statistics for each treatment modality for Neonatal Mortality**

| Neonatal Mortality |                                 |                                      |
|--------------------|---------------------------------|--------------------------------------|
| Treatment          | SUCRA mean (Standard Deviation) | Median rank (95% Credible Intervals) |
| INDOIV             | 0.58 (0.17)                     | 5 (2-8)                              |
| IBUIV              | 0.66 (0.19)                     | 4 (1-7)                              |
| IBUPO              | 0.71 (0.20)                     | 3 (1-8)                              |
| PARAPO             | 0.66 (0.26)                     | 4 (1-9)                              |
| IBUIVHIGHDOSE      | 0.52 (0.34)                     | 6 (1-10)                             |
| IBUPOHIGHDOSE      | 0.32 (0.38)                     | 9 (1-10)                             |
| IBUIVCONT          | 0.56 (0.43)                     | 4 (1-10)                             |
| INDOIVCONT         | 0.29 (0.31)                     | 9 (1-10)                             |
| INDOTHERS          | 0.45 (0.20)                     | 6 (2-9)                              |
| PLAC_NORX          | 0.26 (0.15)                     | 8 (4-10)                             |

**eFigure 12. Network meta-analysis forest plots for outcome: *Risk of Necrotizing Enterocolitis (NEC)***

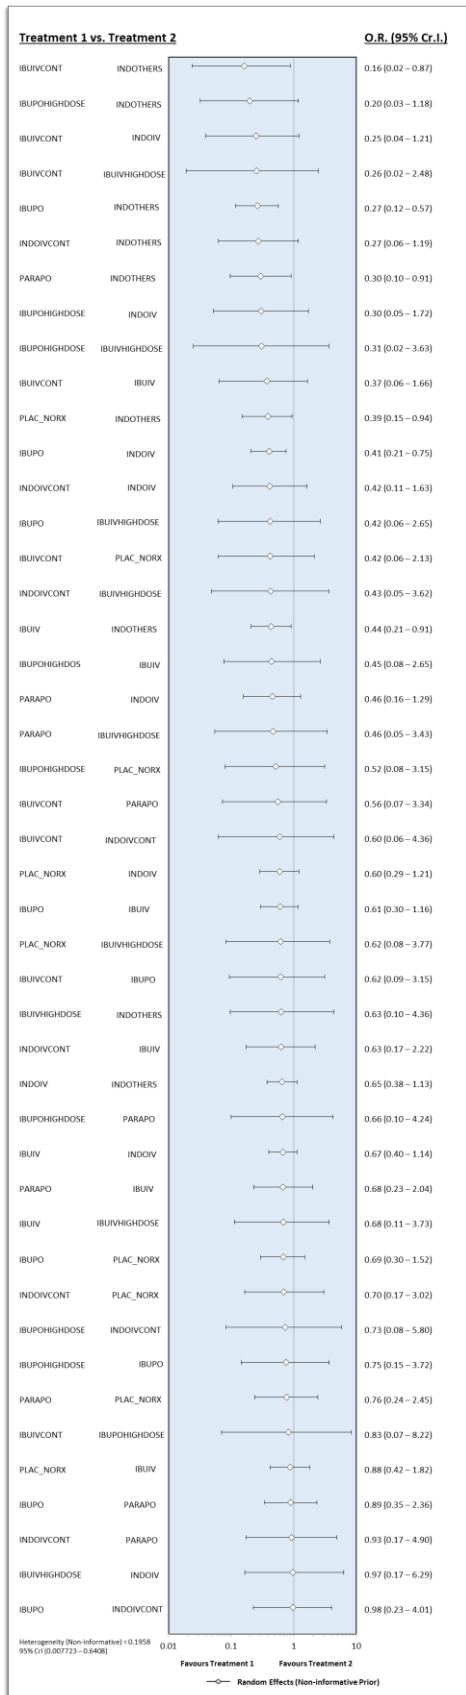

eFigure 12. Forest plot showing network effect estimates (OR with 95% credible intervals) for each possible treatment comparison in the network for risk of NEC computed using Bayesian RE model with non-informative priors; the horizontal axis denotes network odds ratios (with 95% credible intervals)

**eTable 13. GRADE assessment of the Quality of Evidence (QoE) for the network for risk of NEC**

| eTable 13. GRADE assessment of the Quality of Evidence (QoE) for the network for risk of NEC |                           |                                        |                                      |                     |                                         |                                           |                      |                                                            |                                                              |             |                                                             |
|----------------------------------------------------------------------------------------------|---------------------------|----------------------------------------|--------------------------------------|---------------------|-----------------------------------------|-------------------------------------------|----------------------|------------------------------------------------------------|--------------------------------------------------------------|-------------|-------------------------------------------------------------|
| Treatment Comparison                                                                         | No. of direct comparisons | Events in the intervention group (n/N) | Events in the comparison group (n/N) | Direct OR (95% CrI) | QoE (GRADE) based on direct comparisons | QoE (GRADE) based on indirect comparisons | Network OR (95% CrI) | Inconsistency assessment (based on node splitting p value) | Changes in GRADE assessment based on precision & effect size | Network QoE | Network absolute risk difference per 1000 infants (95% CrI) |
| versus INDOIV (INDOIV)                                                                       |                           |                                        |                                      |                     |                                         |                                           |                      |                                                            |                                                              |             | ACR INDOIV 86/931 (9.2%)                                    |
| IBUIV                                                                                        | 10                        | 22/417                                 | 29/404                               | 0.73(0.39-1.41)     | MODERATE                                | MODERATE                                  | 0.67(0.40-1.14)      | 0.64                                                       | None                                                         | MODERATE    | 29 fewer (from 12 more to 53 fewer)                         |
| IBUPO                                                                                        | 4                         | 8/52                                   | 14/51                                | 0.38(0.11-1.29)     | LOW                                     | MODERATE                                  | 0.41(0.21-0.75)      | 0.69                                                       | None                                                         | MODERATE    | 52 fewer (from 21 fewer to 71 fewer)                        |
| PARAPO                                                                                       | 1                         | 2/38                                   | 4/39                                 | 0.43(0.04-2.98)     | MODERATE                                | LOW                                       | 0.46(0.16-1.29)      | 0.6                                                        | None                                                         | MODERATE    | 48 fewer (from 24 more to 76 fewer)                         |
| IBUIVHIGHDOSE                                                                                | —                         | —                                      | —                                    | —                   | —                                       | MODERATE                                  | 0.97(0.17-6.29)      | —                                                          | None                                                         | MODERATE    | 3 fewer (from 75 fewer to 298 more)                         |
| IBUPOHIGHDOSE                                                                                | —                         | —                                      | —                                    | —                   | —                                       | LOW                                       | 0.30(0.05-1.72)      | —                                                          | Rated down (imprecision)                                     | VERY LOW    | 63 fewer (from 57 more to 87 fewer)                         |
| IBUIVCONT                                                                                    | —                         | —                                      | —                                    | —                   | —                                       | LOW                                       | 0.25(0.04-1.21)      | —                                                          | Rated down (imprecision)                                     | VERY LOW    | 68 fewer (from 17 more to 88 fewer)                         |
| INDOIVCONT                                                                                   | 1                         | 0/18                                   | 1/14                                 | 0.00(0.00-0.08)     | LOW                                     | LOW                                       | 0.42(0.11-1.63)      | 0.01                                                       | Rated down (inconsistency)                                   | VERY LOW    | 51 fewer (from 50 more to 81 fewer)                         |
| INDOTHERS                                                                                    | 6                         | 40/300                                 | 30/296                               | 1.40(0.76-2.62)     | LOW                                     | MODERATE                                  | 1.54(0.89-2.65)      | 0.58                                                       | None                                                         | MODERATE    | 43 more (from 9 fewer to 120 more)                          |
| PLAC_NORX                                                                                    | 4                         | 6/129                                  | 8/127                                | 0.71(0.21-2.66)     | MODERATE                                | MODERATE                                  | 0.60(0.29-1.21)      | 0.71                                                       | None                                                         | MODERATE    | 35 fewer (from 17 more to 64 fewer)                         |
| versus IBUIV (IBUIV)                                                                         |                           |                                        |                                      |                     |                                         |                                           |                      |                                                            |                                                              |             | ACR IBUIV 64/778 (8.2%)                                     |
| IBUPO                                                                                        | 3                         | 8/120                                  | 9/116                                | 0.85(0.27-2.46)     | HIGH                                    | LOW                                       | 0.61(0.30-1.16)      | 0.89                                                       | None                                                         | HIGH        | 30 fewer (from 12 more to 56 fewer)                         |
| PARAPO                                                                                       | —                         | —                                      | —                                    | —                   | —                                       | MODERATE                                  | 0.68(0.23-2.04)      | —                                                          | None                                                         | MODERATE    | 25 fewer (from 62 fewer to 72 more)                         |
| IBUIVHIGHDOSE                                                                                | 1                         | 4/35                                   | 3/35                                 | 1.47(0.24-11.01)    | MODERATE                                | Not estimable                             | 1.46(0.27-8.94)      | NA                                                         | None                                                         | MODERATE    | 33 more (from 59 fewer to 363 more)                         |
| IBUPOHIGHDOSE                                                                                | —                         | —                                      | —                                    | —                   | —                                       | MODERATE                                  | 0.45(0.08-2.65)      | —                                                          | Rated down (imprecision)                                     | LOW         | 43 fewer (from 75 fewer to 110 more)                        |
| IBUIVCONT                                                                                    | 1                         | 3/55                                   | 7/56                                 | 0.36(0.06-1.99)     | LOW                                     | Not estimable                             | 0.37(0.06-1.66)      | NA                                                         | Rated down (imprecision)                                     | VERY LOW    | 50 fewer (from 47 more to 77 fewer)                         |
| INDOIVCONT                                                                                   | 1                         | 7/31                                   | 9/32                                 | 0.71(0.18-2.77)     | LOW                                     | Not estimable                             | 0.63(0.17-2.22)      | 0.21                                                       | None                                                         | LOW         | 29 fewer (from 67 fewer to 84 more)                         |
| INDOTHERS                                                                                    | —                         | —                                      | —                                    | —                   | —                                       | LOW                                       | 2.30(1.10-4.81)      | —                                                          | None                                                         | LOW         | 89 more (from 7 more to 219 more)                           |
| PLAC_NORX                                                                                    | 2                         | 11/119                                 | 14/122                               | 0.73(0.26-2.02)     | MODERATE                                | MODERATE                                  | 0.88(0.42-1.82)      | 0.75                                                       | None                                                         | MODERATE    | 9 fewer (from 46 fewer to 58 more)                          |
| versus IBUPO (IBUPO)                                                                         |                           |                                        |                                      |                     |                                         |                                           |                      |                                                            |                                                              |             | ACR IBUPO 36/537 (6.7%)                                     |
| PARAPO                                                                                       | 3                         | 10/164                                 | 9/163                                | 1.10(0.39-3.34)     | MODERATE                                | LOW                                       | 1.12(0.42-2.88)      | 0.7                                                        | None                                                         | MODERATE    | 7 more (from 38 fewer to 104 more)                          |
| IBUIVHIGHDOSE                                                                                | —                         | —                                      | —                                    | —                   | —                                       | MODERATE                                  | 2.39(0.38-16.16)     | —                                                          | Rated down (imprecision)                                     | LOW         | 80 more (from 40 fewer to 470 more)                         |
| IBUPOHIGHDOSE                                                                                | 1                         | 4/30                                   | 5/30                                 | 0.75(0.14-3.79)     | MODERATE                                | Not estimable                             | 0.75(0.15-3.72)      | NA                                                         | None                                                         | MODERATE    | 16 fewer (from 56 fewer to 144 more)                        |
| IBUIVCONT                                                                                    | —                         | —                                      | —                                    | —                   | —                                       | LOW                                       | 0.62(0.09-3.15)      | —                                                          | Rated down (imprecision)                                     | VERY LOW    | 24 fewer (from 61 fewer to 118 more)                        |
| INDOIVCONT                                                                                   | —                         | —                                      | —                                    | —                   | —                                       | LOW                                       | 1.02(0.25-4.43)      | —                                                          | None                                                         | LOW         | 1 more (from 49 fewer to 174 more)                          |
| INDOTHERS                                                                                    | 3                         | 8/63                                   | 2/76                                 | 5.55(1.20-41.14)    | LOW                                     | Very low                                  | 3.77(1.77-8.47)      | 0.67                                                       | None                                                         | LOW         | 146 more (from 46 more to 311 more)                         |
| PLAC_NORX                                                                                    | 3                         | 7/96                                   | 4/96                                 | 1.99(0.50-9.54)     | VERY LOW                                | LOW                                       | 1.46(0.66-3.36)      | 0.76                                                       | None                                                         | LOW         | 28 more (from 22 fewer to 127 more)                         |
| versus PARAPO (PARAPO)                                                                       |                           |                                        |                                      |                     |                                         |                                           |                      |                                                            |                                                              |             | ACR PARAPO 12/202 (5.9%)                                    |
| IBUIVHIGHDOSE                                                                                | —                         | —                                      | —                                    | —                   | —                                       | MODERATE                                  | 2.16(0.29-18.21)     | —                                                          | Rated down (imprecision)                                     | LOW         | 61 more (from 41 fewer to 476 more)                         |
| IBUPOHIGHDOSE                                                                                | —                         | —                                      | —                                    | —                   | —                                       | LOW                                       | 0.66(0.10-4.24)      | —                                                          | None                                                         | LOW         | 19 fewer (from 53 fewer to 152 more)                        |
| IBUIVCONT                                                                                    | —                         | —                                      | —                                    | —                   | —                                       | LOW                                       | 0.56(0.07-3.34)      | —                                                          | Rated down (imprecision)                                     | VERY LOW    | 25 fewer (from 55 fewer to 115 more)                        |
| INDOIVCONT                                                                                   | —                         | —                                      | —                                    | —                   | —                                       | LOW                                       | 0.93(0.17-4.90)      | —                                                          | None                                                         | LOW         | 4 fewer (from 49 fewer to 177 more)                         |
| INDOTHERS                                                                                    | —                         | —                                      | —                                    | —                   | —                                       | LOW                                       | 3.36(1.10-10.38)     | —                                                          | Rated down (imprecision)                                     | VERY LOW    | 116 more (from 6 more to 337 more)                          |
| PLAC_NORX                                                                                    | —                         | —                                      | —                                    | —                   | —                                       | MODERATE                                  | 1.31(0.41-4.17)      | —                                                          | None                                                         | MODERATE    | 17 more (from 34 fewer to 149 more)                         |
| versus IBUIVHIGHDOSE (IBUIVHIGHDOSE)                                                         |                           |                                        |                                      |                     |                                         |                                           |                      |                                                            |                                                              |             | ACR IBUIVHIGHDOSE 4/35 (11.4%)                              |
| IBUPOHIGHDOSE                                                                                | —                         | —                                      | —                                    | —                   | —                                       | MODERATE                                  | 0.31(0.02-3.63)      | —                                                          | Rated down (imprecision)                                     | LOW         | 76 fewer (from 112 fewer to 205 more)                       |
| IBUIVCONT                                                                                    | —                         | —                                      | —                                    | —                   | —                                       | LOW                                       | 0.26(0.02-2.48)      | —                                                          | Rated down (imprecision)                                     | VERY LOW    | 82 fewer (from 112 fewer to 128 more)                       |
| INDOIVCONT                                                                                   | —                         | —                                      | —                                    | —                   | —                                       | LOW                                       | 0.43(0.05-3.62)      | —                                                          | Rated down (imprecision)                                     | VERY LOW    | 62 fewer (from 108 fewer to 204 more)                       |
| INDOTHERS                                                                                    | —                         | —                                      | —                                    | —                   | —                                       | LOW                                       | 1.59(0.23-10.27)     | —                                                          | Rated down (imprecision)                                     | VERY LOW    | 56 more (from 85 fewer to 456 more)                         |
| PLAC_NORX                                                                                    | —                         | —                                      | —                                    | —                   | —                                       | MODERATE                                  | 0.62(0.08-3.77)      | —                                                          | Rated down (imprecision)                                     | LOW         | 40 fewer (from 104 fewer to 213 more)                       |

**eTable 13. GRADE assessment of the Quality of Evidence (QoE) for the network for risk of NEC**

| Treatment Comparison  | No. of direct comparisons | Events in the intervention group (n/N) | Events in the comparison group (n/N) | Direct OR (95% CrI) | QoE (GRADE) based on direct comparisons | QoE (GRADE) based on indirect comparisons | Network OR (95% CrI) | Inconsistency assessment (based on node splitting p value) | Changes in GRADE assessment based on precision & effect size | Network QoE | Network absolute risk difference per 1000 infants (95% CrI) |
|-----------------------|---------------------------|----------------------------------------|--------------------------------------|---------------------|-----------------------------------------|-------------------------------------------|----------------------|------------------------------------------------------------|--------------------------------------------------------------|-------------|-------------------------------------------------------------|
| <b>(...continued)</b> |                           |                                        |                                      |                     |                                         |                                           |                      |                                                            |                                                              |             |                                                             |
| versus IBUPOHIGHDOSE  |                           | (IBUPOHIGHDOSE)                        |                                      |                     |                                         |                                           |                      |                                                            |                                                              |             | ACR IBUPOHIGHDOSE<br>4/30 (13.3%)                           |
| IBUIVCONT             | —                         |                                        |                                      | —                   | —                                       | LOW                                       | 0.83(0.07-8.22)      | —                                                          | Rated down (imprecision)                                     | VERY LOW    | 20 fewer (from 123 fewer to 425 more)                       |
| INDOIVCONT            | —                         |                                        |                                      | —                   | —                                       | LOW                                       | 1.36(0.17-12.04)     | —                                                          | Rated down (imprecision)                                     | VERY LOW    | 40 more (from 108 fewer to 516 more)                        |
| INDOTHERS             | —                         |                                        |                                      | —                   | —                                       | LOW                                       | 5.06(0.85-31.10)     | —                                                          | Rated down (imprecision)                                     | VERY LOW    | 304 more (from 18 fewer to 694 more)                        |
| PLAC_NORX             | —                         |                                        |                                      | —                   | —                                       | LOW                                       | 1.93(0.32-12.39)     | —                                                          | Rated down (imprecision)                                     | VERY LOW    | 96 more (from 86 fewer to 523 more)                         |
| versus IBUIVCONT      |                           | (IBUIVCONT)                            |                                      |                     |                                         |                                           |                      |                                                            |                                                              |             | ACR IBUIVCONT<br>3/55 (5.5%)                                |
| INDOIVCONT            | —                         |                                        |                                      | —                   | —                                       | LOW                                       | 1.67(0.23-16.00)     | —                                                          | Rated down (imprecision)                                     | VERY LOW    | 33 more (from 41 fewer to 425 more)                         |
| INDOTHERS             | —                         |                                        |                                      | —                   | —                                       | LOW                                       | 6.18(1.15-42.37)     | —                                                          | Rated up (large effect)                                      | MODERATE    | 208 more (from 8 more to 655 more)                          |
| PLAC_NORX             | —                         |                                        |                                      | —                   | —                                       | LOW                                       | 2.36(0.47-16.10)     | —                                                          | Rated down (imprecision)                                     | VERY LOW    | 65 more (from 28 fewer to 427 more)                         |
| versus INDOIVCONT     |                           | (INDOIVCONT)                           |                                      |                     |                                         |                                           |                      |                                                            |                                                              |             | ACR INDOIVCONT<br>7/49 (14.3%)                              |
| INDOTHERS             | —                         |                                        |                                      | —                   | —                                       | LOW                                       | 3.68(0.84-15.96)     | —                                                          | Rated down (imprecision)                                     | VERY LOW    | 237 more (from 20 fewer to 584 more)                        |
| PLAC_NORX             | —                         |                                        |                                      | —                   | —                                       | LOW                                       | 1.43(0.33-6.03)      | —                                                          | None                                                         | LOW         | 50 more (from 91 fewer to 358 more)                         |
| versus INDOTHERS      |                           | (INDOTHERS)                            |                                      |                     |                                         |                                           |                      |                                                            |                                                              |             | ACR INDOTHERS<br>49/387 (12.7%)                             |
| PLAC_NORX             | 1                         | 0/23                                   | 1/24                                 | 0.00(0.00-0.08)     | HIGH                                    | LOW                                       | 0.38(0.15-0.94)      | 0.28                                                       | None                                                         | HIGH        | 74 fewer (from 7 fewer to 105 fewer)                        |

Abbreviations: NA: Not Applicable; QoE: Quality of Evidence; OR: Odds Ratio; CrI: Credible Intervals; ACR: Assumed control risk

**eFigure 13. Ranking probability (rankogram) of each treatment modality for risk of NEC**

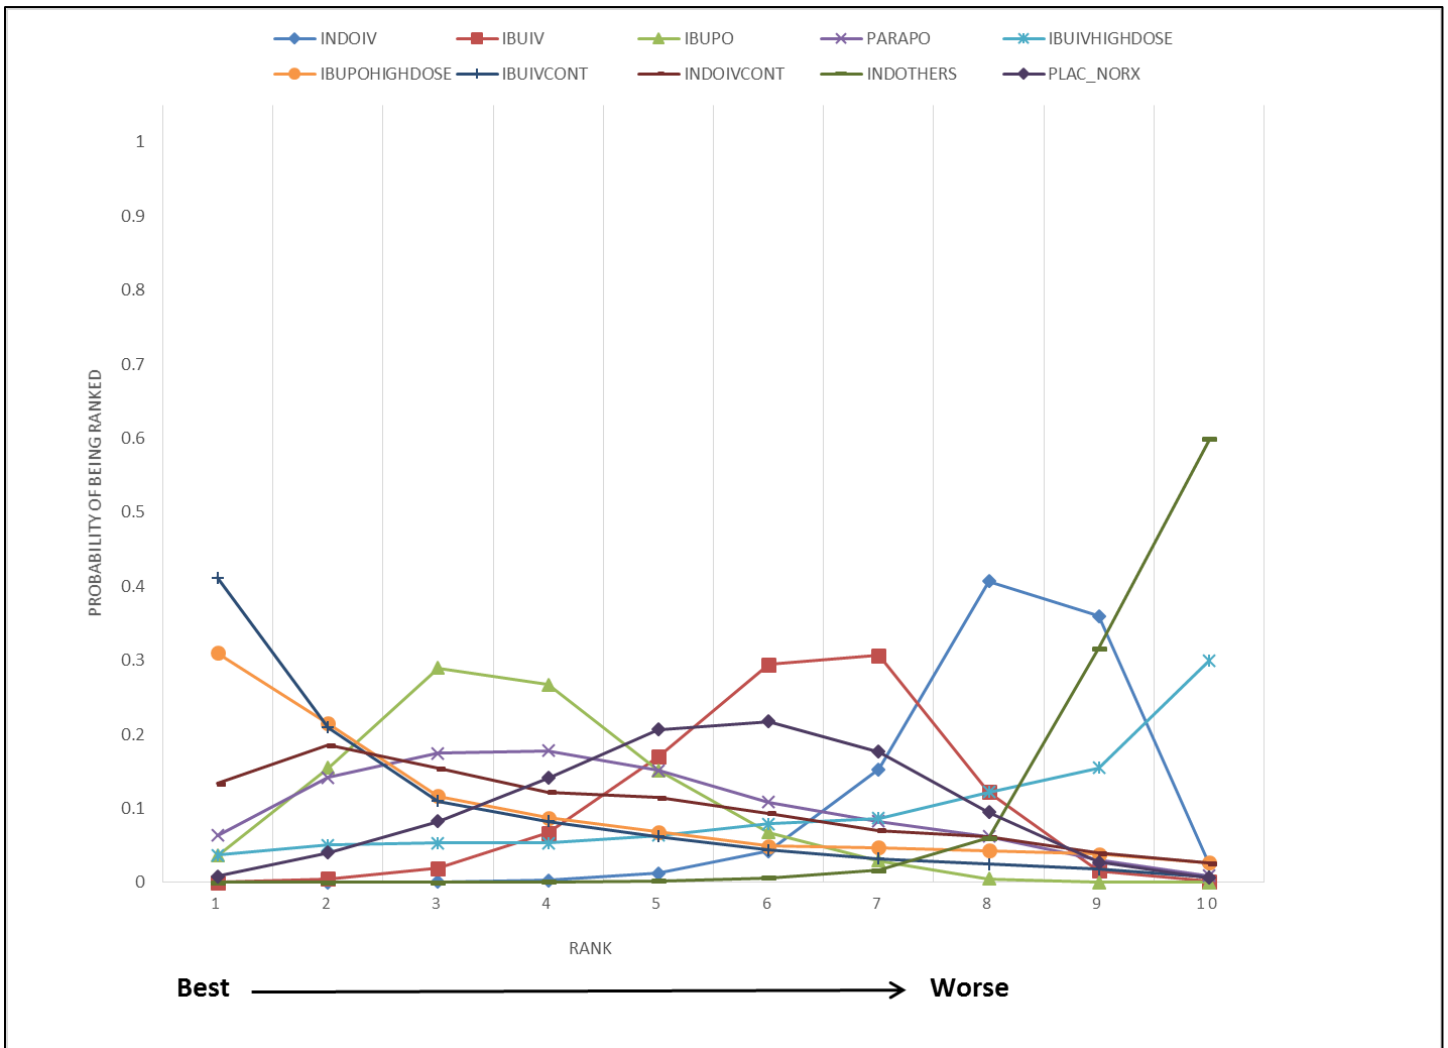

eFigure 13. Each line indicates a treatment modality. The horizontal x-axis represents the ranking of strategies in which the first through 10<sup>th</sup> modalities are ranked in numerical order, with the first representing the best strategy. The vertical y-axis represents the probability of each ranking.

**eTable 14. Ranking statistics for each treatment modality for risk of NEC**

| Risk of Necrotizing Enterocolitis |                                 |                                      |
|-----------------------------------|---------------------------------|--------------------------------------|
| Treatment                         | SUCRA mean (Standard Deviation) | Median rank (95% Credible Intervals) |
| INDOIV                            | 0.21 (0.11)                     | 8 (6-9)                              |
| IBUIV                             | 0.42 (0.14)                     | 6 (4-8)                              |
| IBUPO                             | 0.70 (0.15)                     | 4 (1-7)                              |
| PARAPO                            | 0.62 (0.24)                     | 4 (1-9)                              |
| IBUIVHIGHDOSE                     | 0.30 (0.31)                     | 8 (1-10)                             |
| IBUPOHIGHDOSE                     | 0.74 (0.29)                     | 2 (1-10)                             |
| IBUIVCONT                         | 0.81 (0.24)                     | 2 (1-9)                              |
| INDOIVCONT                        | 0.65 (0.27)                     | 4 (1-10)                             |
| INDOTHERS                         | 0.06 (0.09)                     | 10 (7-10)                            |
| PLAC_NORX                         | 0.50 (0.19)                     | 6 (2-9)                              |



**eFigure 14. Network meta-analysis forest plots for outcome: Risk of Bronchopulmonary Dysplasia (BPD)**

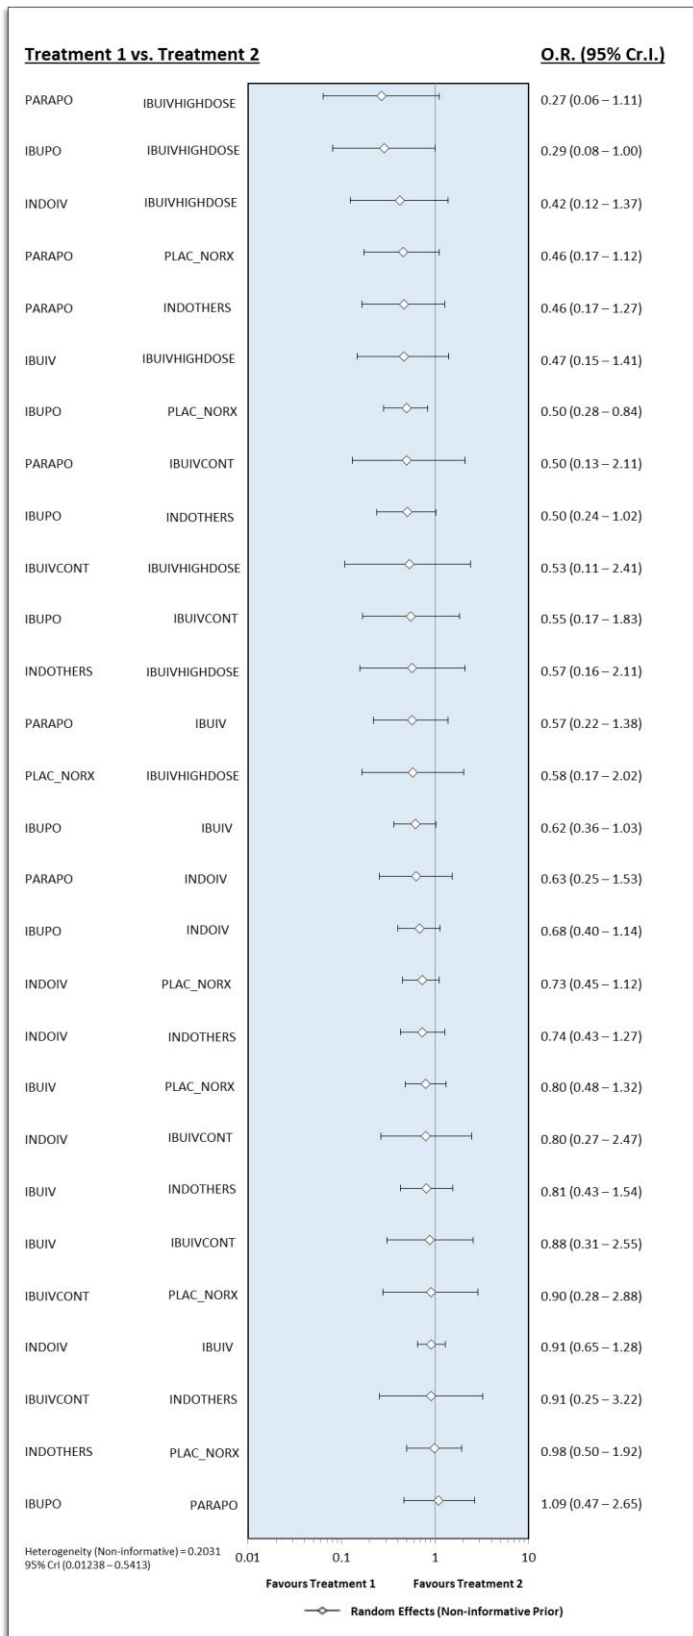

eFigure 14. Forest plot showing network effect estimates (OR with 95% credible intervals) for each possible treatment comparison in the network for risk of BPD computed using Bayesian RE model with non-informative priors; the horizontal axis denotes network odds ratios (with 95% credible intervals)

**eTable 15. GRADE assessment of the Quality of Evidence (QoE) for the network for risk of BPD**

| eTable 15. GRADE assessment of the Quality of Evidence (QoE) for the network for risk of BPD |                           |                                        |                                     |                     |                                         |                                           |                      |                                                            |                                                              |             |                                                             |
|----------------------------------------------------------------------------------------------|---------------------------|----------------------------------------|-------------------------------------|---------------------|-----------------------------------------|-------------------------------------------|----------------------|------------------------------------------------------------|--------------------------------------------------------------|-------------|-------------------------------------------------------------|
| Treatment Comparison                                                                         | No. of direct comparisons | Events in the intervention group (n/N) | Events in the comparison group(n/N) | Direct OR (95% CrI) | QoE (GRADE) based on direct comparisons | QoE (GRADE) based on indirect comparisons | Network OR (95% CrI) | Inconsistency assessment (based on node splitting p value) | Changes in GRADE assessment based on precision & effect size | Network QoE | Network absolute risk difference per 1000 infants (95% CrI) |
| versus INDOIV (INDOIV)                                                                       |                           |                                        |                                     |                     |                                         |                                           |                      |                                                            |                                                              |             | ACR INDOIV 307/810 (37.9%)                                  |
| IBUIV                                                                                        | 8                         | 152/392                                | 143/385                             | 1.10(0.73-1.61)     | MODERATE                                | MODERATE                                  | 1.10(0.78-1.55)      | 0.41                                                       | None                                                         | MODERATE    | 23 more (from 56 fewer to 107 more)                         |
| IBUPO                                                                                        | 2                         | 12/24                                  | 13/24                               | 0.80(0.23-2.92)     | LOW                                     | MODERATE                                  | 0.68(0.40-1.14)      | 0.65                                                       | None                                                         | MODERATE    | 86 fewer (from 31 more to 183 fewer)                        |
| PARAPO                                                                                       | 1                         | 5/38                                   | 6/39                                | 0.82(0.18-3.60)     | MODERATE                                | LOW                                       | 0.63(0.25-1.53)      | 0.81                                                       | None                                                         | MODERATE    | 101 fewer (from 104 more to 247 fewer)                      |
| IBUIVHIGHDOSE                                                                                | —                         | —                                      | —                                   | —                   | —                                       | MODERATE                                  | 2.37(0.73-8.02)      | —                                                          | None                                                         | MODERATE    | 212 more (from 71 fewer to 451 more)                        |
| IBUIVCONT                                                                                    | —                         | —                                      | —                                   | —                   | —                                       | LOW                                       | 1.25(0.40-3.76)      | —                                                          | None                                                         | LOW         | 54 more (from 183 fewer to 317 more)                        |
| INDOTHERS                                                                                    | 4                         | 72/195                                 | 58/191                              | 1.39(0.81-2.45)     | LOW                                     | MODERATE                                  | 1.36(0.78-2.32)      | 0.89                                                       | None                                                         | MODERATE    | 75 more (from 56 fewer to 207 more)                         |
| PLAC_NORX                                                                                    | 5                         | 95/175                                 | 87/171                              | 1.30(0.75-2.34)     | MODERATE                                | MODERATE                                  | 1.37(0.89-2.20)      | 0.58                                                       | None                                                         | MODERATE    | 76 more (from 27 fewer to 194 more)                         |
| versus IBUIV (IBUIV)                                                                         |                           |                                        |                                     |                     |                                         |                                           |                      |                                                            |                                                              |             | ACR IBUIV 226/653 (34.6%)                                   |
| IBUPO                                                                                        | 3                         | 30/120                                 | 35/116                              | 0.72(0.34-1.48)     | HIGH                                    | LOW                                       | 0.62(0.36-1.03)      | 0.55                                                       | None                                                         | HIGH        | 99 fewer (from 7 more to 186 fewer)                         |
| PARAPO                                                                                       | —                         | —                                      | —                                   | —                   | —                                       | MODERATE                                  | 0.57(0.22-1.38)      | —                                                          | None                                                         | MODERATE    | 114 fewer (from 76 more to 242 fewer)                       |
| IBUIVHIGHDOSE                                                                                | 1                         | 16/35                                  | 10/35                               | 2.06(0.65-6.62)     | MODERATE                                | NOT ESTIMABLE                             | 2.14(0.71-6.86)      | NA                                                         | None                                                         | MODERATE    | 185 more (from 73 fewer to 438 more)                        |
| IBUIVCONT                                                                                    | 1                         | 13/55                                  | 12/56                               | 1.12(0.39-3.39)     | LOW                                     | NOT ESTIMABLE                             | 1.13(0.39-3.26)      | NA                                                         | None                                                         | LOW         | 28 more (from 175 fewer to 287 more)                        |
| INDOTHERS                                                                                    | —                         | —                                      | —                                   | —                   | —                                       | LOW                                       | 1.23(0.65-2.35)      | —                                                          | None                                                         | LOW         | 48 more (from 90 fewer to 208 more)                         |
| PLAC_NORX                                                                                    | 1                         | 16/51                                  | 17/54                               | 1.00(0.36-2.75)     | MODERATE                                | MODERATE                                  | 1.25(0.76-2.09)      | 0.4                                                        | None                                                         | MODERATE    | 52 more (from 59 fewer to 179 more)                         |
| versus IBUPO (IBUPO)                                                                         |                           |                                        |                                     |                     |                                         |                                           |                      |                                                            |                                                              |             | ACR IBUPO 72/363 (19.8%)                                    |
| PARAPO                                                                                       | 2                         | 9/124                                  | 11/123                              | 0.79(0.25-2.51)     | MODERATE                                | LOW                                       | 0.92(0.38-2.15)      | 0.85                                                       | None                                                         | MODERATE    | 13 fewer (from 112 fewer to 149 more)                       |
| IBUIVHIGHDOSE                                                                                | —                         | —                                      | —                                   | —                   | —                                       | MODERATE                                  | 3.49(1.00-12.43)     | —                                                          | None                                                         | MODERATE    | 265 more (from 0 fewer to 556 more)                         |
| IBUIVCONT                                                                                    | —                         | —                                      | —                                   | —                   | —                                       | LOW                                       | 1.82(0.55-5.91)      | —                                                          | None                                                         | LOW         | 112 more (from 79 fewer to 396 more)                        |
| INDOTHERS                                                                                    | —                         | —                                      | —                                   | —                   | —                                       | VERY LOW                                  | 1.99(0.98-4.16)      | —                                                          | None                                                         | VERY LOW    | 132 more (from 3 fewer to 309 more)                         |
| PLAC_NORX                                                                                    | 3                         | 35/96                                  | 19/96                               | 2.96(1.29-7.05)     | VERY LOW                                | LOW                                       | 2.01(1.19-3.56)      | 0.32                                                       | None                                                         | LOW         | 134 more (from 29 more to 270 more)                         |
| versus PARAPO (PARAPO)                                                                       |                           |                                        |                                     |                     |                                         |                                           |                      |                                                            |                                                              |             | ACR PARAPO 14/162 (8.6%)                                    |
| IBUIVHIGHDOSE                                                                                | —                         | —                                      | —                                   | —                   | —                                       | MODERATE                                  | 3.74(0.90-15.61)     | —                                                          | Rated down (imprecision)                                     | LOW         | 175 more (from 8 fewer to 510 more)                         |
| IBUIVCONT                                                                                    | —                         | —                                      | —                                   | —                   | —                                       | LOW                                       | 2.01(0.47-7.68)      | —                                                          | None                                                         | LOW         | 73 more (from 44 fewer to 334 more)                         |
| INDOTHERS                                                                                    | —                         | —                                      | —                                   | —                   | —                                       | LOW                                       | 2.16(0.79-6.01)      | —                                                          | None                                                         | LOW         | 83 more (from 17 fewer to 276 more)                         |
| PLAC_NORX                                                                                    | —                         | —                                      | —                                   | —                   | —                                       | MODERATE                                  | 2.17(0.89-5.76)      | —                                                          | None                                                         | MODERATE    | 84 more (from 9 fewer to 266 more)                          |
| versus IBUIVHIGHDOSE (IBUIVHIGHDOSE)                                                         |                           |                                        |                                     |                     |                                         |                                           |                      |                                                            |                                                              |             | ACR IBUIVHIGHDOSE 16/35 (45.7%)                             |
| IBUIVCONT                                                                                    | —                         | —                                      | —                                   | —                   | —                                       | LOW                                       | 0.53(0.11-2.41)      | —                                                          | None                                                         | LOW         | 149 fewer (from 213 more to 372 fewer)                      |
| INDOTHERS                                                                                    | —                         | —                                      | —                                   | —                   | —                                       | LOW                                       | 0.57(0.16-2.11)      | —                                                          | None                                                         | LOW         | 133 fewer (from 183 more to 338 fewer)                      |
| PLAC_NORX                                                                                    | —                         | —                                      | —                                   | —                   | —                                       | MODERATE                                  | 0.58(0.17-2.02)      | —                                                          | None                                                         | MODERATE    | 129 fewer (from 173 more to 332 fewer)                      |
| versus IBUIVCONT (IBUIVCONT)                                                                 |                           |                                        |                                     |                     |                                         |                                           |                      |                                                            |                                                              |             | ACR IBUIVCONT 13/55 (23.6%)                                 |
| INDOTHERS                                                                                    | —                         | —                                      | —                                   | —                   | —                                       | LOW                                       | 1.10(0.31-3.93)      | —                                                          | None                                                         | LOW         | 18 more (from 149 fewer to 312 more)                        |
| PLAC_NORX                                                                                    | —                         | —                                      | —                                   | —                   | —                                       | LOW                                       | 1.11(0.35-3.63)      | —                                                          | None                                                         | LOW         | 19 more (from 139 fewer to 293 more)                        |
| versus INDOTHERS (INDOTHERS)                                                                 |                           |                                        |                                     |                     |                                         |                                           |                      |                                                            |                                                              |             | ACR INDOTHERS 73/207 (35.3%)                                |
| PLAC_NORX                                                                                    | 1                         | 1/11                                   | 1/12                                | 0.99(0.02-71.31)    | HIGH                                    | LOW                                       | 1.02(0.52-2.00)      | 0.21                                                       | None                                                         | HIGH        | 5 more (from 132 fewer to 169 more)                         |

Abbreviations: NA: Not Applicable; QoE: Quality of Evidence; OR: Odds Ratio; CrI: Credible Intervals; ACR: Assumed control risk

**eFigure 15. Ranking probability (rankogram) of each treatment modality for risk of BPD**

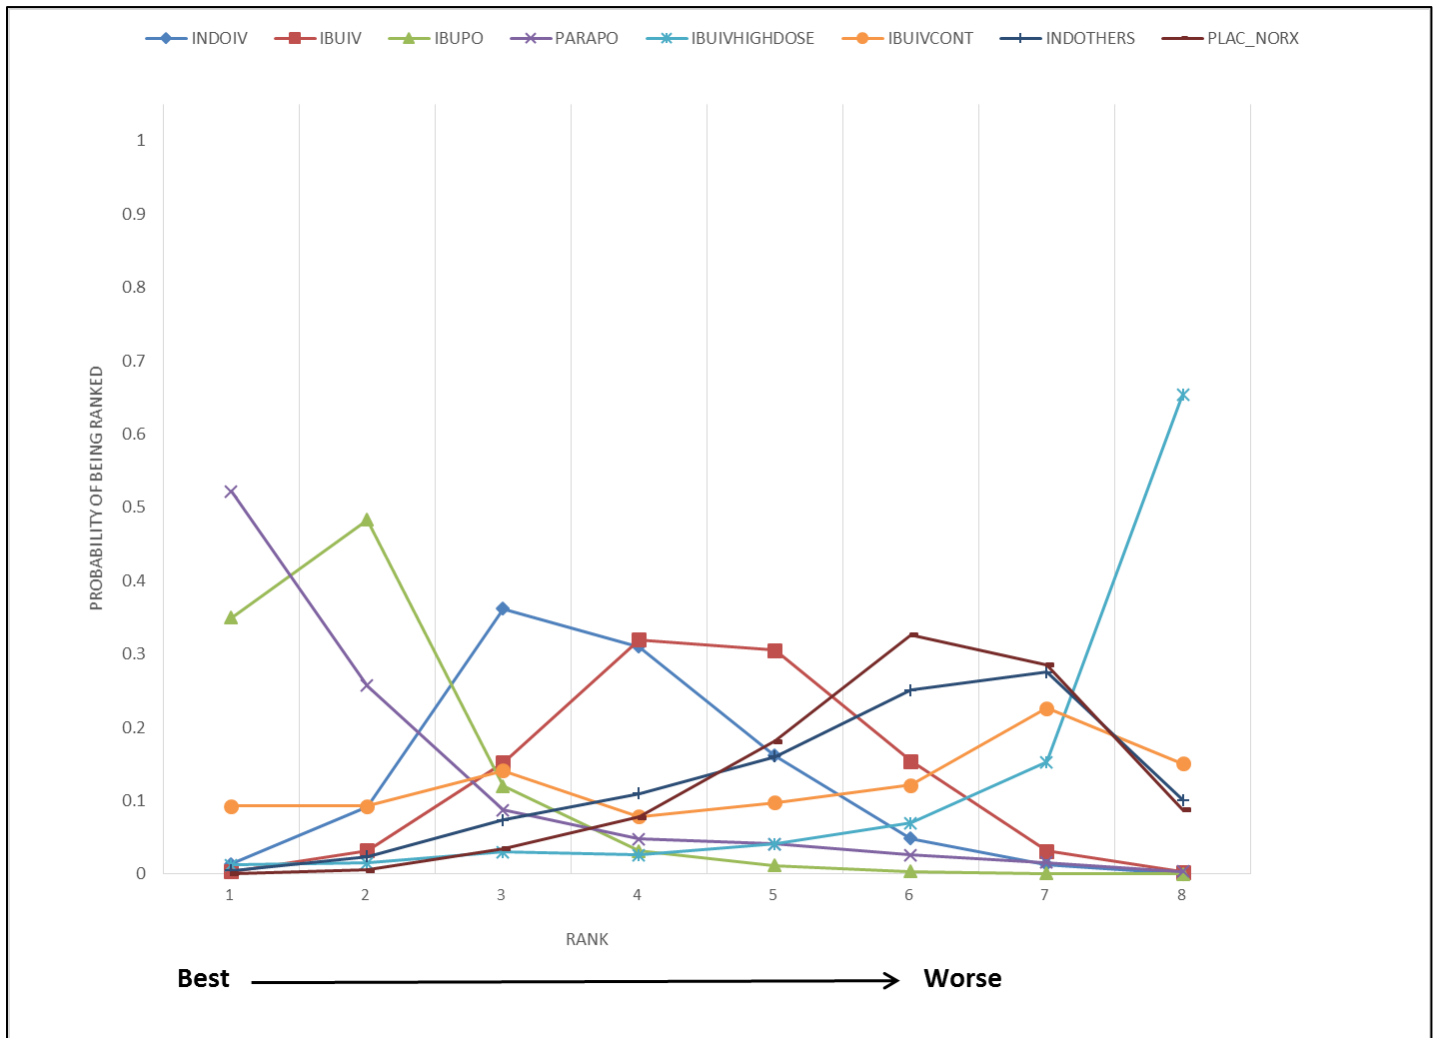

eFigure 15. Each line indicates a treatment modality. The horizontal x-axis represents the ranking of strategies in which the first through 8<sup>th</sup> modalities are ranked in numerical order, with the first representing the best strategy. The vertical y-axis represents the probability of each ranking.

**eTable 16. Ranking statistics for each treatment modality for risk of BPD**

| Risk of Bronchopulmonary Dysplasia |                                 |                                       |
|------------------------------------|---------------------------------|---------------------------------------|
| Treatment                          | SUCRA mean (Standard Deviation) | Median rank (95 % Credible Intervals) |
| INDOIV                             | 0.61 (0.16)                     | 4 (2-6)                               |
| IBUIV                              | 0.50 (0.16)                     | 4 (2-7)                               |
| IBUPO                              | 0.87 (0.13)                     | 2 (1-4)                               |
| PARAPO                             | 0.86 (0.21)                     | 1 (1-6)                               |
| IBUIVHIGHDOSE                      | 0.12 (0.22)                     | 8 (2-8)                               |
| IBUIVCONT                          | 0.43 (0.33)                     | 5 (1-8)                               |
| INDOTHERS                          | 0.32 (0.22)                     | 6 (2-8)                               |
| PLAC_NORX                          | 0.29 (0.18)                     | 6 (3-8)                               |

**eFigure 16. Network meta-analysis forest plots for outcome: Risk of Intraventricular Hemorrhage (IVH)**

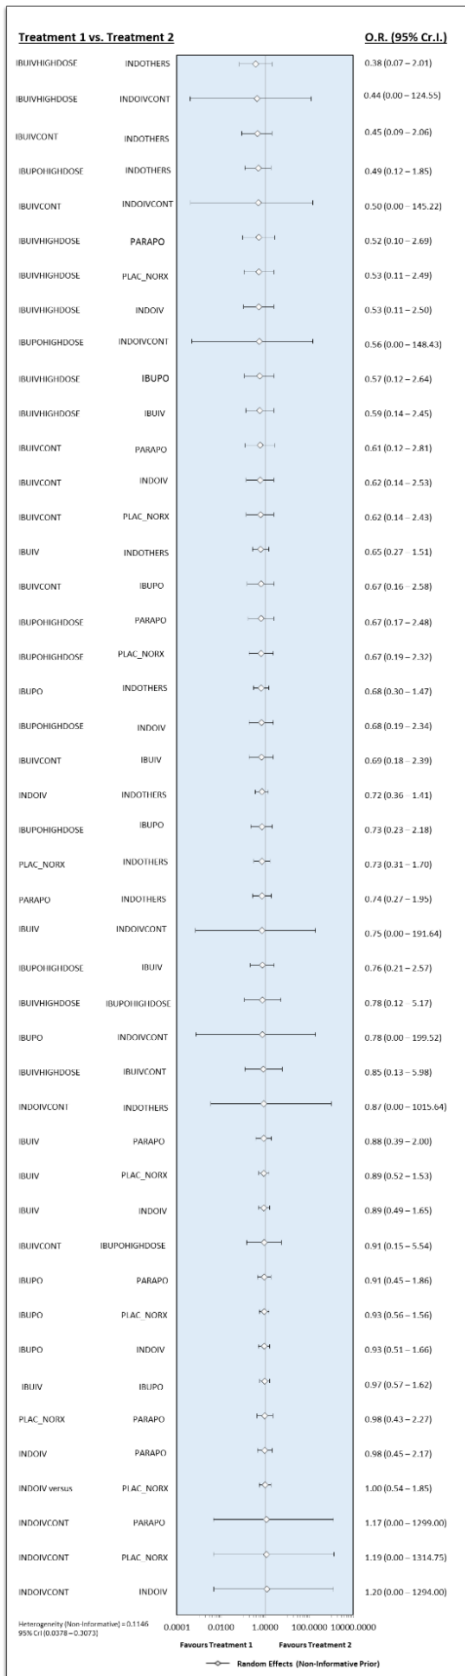

eFigure 16. Forest plot showing network effect estimates (OR with 95% credible intervals) for each possible treatment comparison in the network for risk of IVH computed using Bayesian RE model with non-informative priors; the horizontal axis denotes network odds ratios (with 95% credible intervals)

**eTable 17. GRADE assessment of the Quality of Evidence (QoE) for the network for risk of IVH**

| <b>eTable 17. GRADE assessment of the Quality of Evidence (QoE) for the network for risk of IVH</b> |                           |                                        |                                   |                     |                                         |                                           |                      |                                                            |                                                              |             |                                                             |
|-----------------------------------------------------------------------------------------------------|---------------------------|----------------------------------------|-----------------------------------|---------------------|-----------------------------------------|-------------------------------------------|----------------------|------------------------------------------------------------|--------------------------------------------------------------|-------------|-------------------------------------------------------------|
| Treatment Comparison                                                                                | No. of direct comparisons | Events in the intervention group (n/N) | Events in the control group (n/N) | Direct OR (95% CrI) | QoE (GRADE) based on direct comparisons | QoE (GRADE) based on indirect comparisons | Network OR (95% CrI) | Inconsistency assessment (based on node splitting p value) | Changes in GRADE assessment based on precision & effect size | Network QoE | Network absolute risk difference per 1000 (95% CrI) infants |
| versus INDOIV (INDOIV)                                                                              |                           |                                        |                                   |                     |                                         |                                           |                      |                                                            |                                                              |             | ACR INDOIV 53/285 (18.6%)                                   |
| IBUIV                                                                                               | 3                         | 11/74                                  | 13/75                             | 0.84(0.32-2.15)     | MODERATE                                | MODERATE                                  | 0.89(0.49-1.65)      | 0.8                                                        | None                                                         | MODERATE    | 17 fewer (from 85 fewer to 88 more)                         |
| IBUPO                                                                                               | 2                         | 6/31                                   | 3/33                              | 2.62(0.57-15.12)    | LOW                                     | MODERATE                                  | 0.93(0.51-1.66)      | 0.18                                                       | None                                                         | MODERATE    | 11 fewer (from 82 fewer to 89 more)                         |
| PARAPO                                                                                              | 1                         | 8/38                                   | 7/39                              | 1.21(0.32-4.61)     | MODERATE                                | LOW                                       | 1.02(0.46-2.23)      | 0.64                                                       | None                                                         | MODERATE    | 3 more (from 91 fewer to 152 more)                          |
| IBUIVHIGHDOSE                                                                                       | —                         | —                                      | —                                 | —                   | —                                       | MODERATE                                  | 0.53(0.11-2.50)      | —                                                          | None                                                         | MODERATE    | 78 fewer (from 161 fewer to 178 more)                       |
| IBUPOHIGHDOSE                                                                                       | —                         | —                                      | —                                 | —                   | —                                       | LOW                                       | 0.68(0.19-2.34)      | —                                                          | None                                                         | LOW         | 52 fewer (from 144 fewer to 162 more)                       |
| IBUIVCONT                                                                                           | —                         | —                                      | —                                 | —                   | —                                       | LOW                                       | 0.62(0.14-2.53)      | —                                                          | None                                                         | LOW         | 62 fewer (from 155 fewer to 180 more)                       |
| INDOIVCONT                                                                                          | 1                         | 0/18                                   | 0/14                              | 1.21(0.00-1562)     | LOW                                     | NOT ESTIMABLE                             | 1.20(0.00-1294)      | NA                                                         | Rated down (imprecision)                                     | VERY LOW    | 29 more (from – to 811 more)*                               |
| INDOTHERS                                                                                           | 2                         | 20/77                                  | 16/77                             | 1.38(0.59-3.63)     | LOW                                     | MODERATE                                  | 1.38(0.71-2.77)      | 0.92                                                       | None                                                         | MODERATE    | 54 more (from 46 fewer to 202 more)                         |
| PLAC_NORX                                                                                           | 2                         | 10/47                                  | 14/47                             | 0.63(0.22-1.84)     | MODERATE                                | MODERATE                                  | 1.00(0.54-1.85)      | 0.21                                                       | None                                                         | MODERATE    | 0 fewer (from 76 fewer to 111 more)                         |
| versus IBUIV (IBUIV)                                                                                |                           |                                        |                                   |                     |                                         |                                           |                      |                                                            |                                                              |             | ACR IBUIV 72/349 (20.6%)                                    |
| IBUPO                                                                                               | 3                         | 25/120                                 | 23/116                            | 1.10(0.52-2.34)     | HIGH                                    | LOW                                       | 1.04(0.62-1.77)      | 0.83                                                       | None                                                         | HIGH        | 6 more (from 68 fewer to 109 more)                          |
| PARAPO                                                                                              | —                         | —                                      | —                                 | —                   | —                                       | MODERATE                                  | 1.14(0.50-2.59)      | —                                                          | None                                                         | MODERATE    | 22 more (from 91 fewer to 196 more)                         |
| IBUIVHIGHDOSE                                                                                       | 1                         | 4/35                                   | 6/35                              | 0.60(0.13-2.73)     | MODERATE                                | NOT ESTIMABLE                             | 0.59(0.14-2.45)      | NA                                                         | None                                                         | MODERATE    | 73 fewer (from 171 fewer to 183 more)                       |
| IBUPOHIGHDOSE                                                                                       | —                         | —                                      | —                                 | —                   | —                                       | MODERATE                                  | 0.76(0.21-2.57)      | —                                                          | None                                                         | MODERATE    | 41 fewer (from 155 fewer to 194 more)                       |
| IBUIVCONT                                                                                           | 1                         | 5/55                                   | 7/56                              | 0.70(0.17-2.75)     | LOW                                     | NOT ESTIMABLE                             | 0.69(0.18-2.39)      | NA                                                         | None                                                         | LOW         | 54 fewer (from 162 fewer to 177 more)                       |
| INDOIVCONT                                                                                          | —                         | —                                      | —                                 | —                   | —                                       | LOW                                       | 1.34(0.01-1413)      | —                                                          | Rated down (imprecision)                                     | VERY LOW    | 52 more (from 204 fewer to 791 more)                        |
| INDOTHERS                                                                                           | —                         | —                                      | —                                 | —                   | —                                       | LOW                                       | 1.54(0.66-3.64)      | —                                                          | None                                                         | LOW         | 80 more (from 60 fewer to 280 more)                         |
| PLAC_NORX                                                                                           | 1                         | 25/68                                  | 25/68                             | 0.99(0.40-2.50)     | MODERATE                                | MODERATE                                  | 1.12(0.65-1.94)      | 0.69                                                       | None                                                         | MODERATE    | 19 more (from 62 fewer to 129 more)                         |
| versus IBUPO (IBUPO)                                                                                |                           |                                        |                                   |                     |                                         |                                           |                      |                                                            |                                                              |             | ACR IBUPO 90/430 (20.9%)                                    |
| PARAPO                                                                                              | 2                         | 14/124                                 | 14/123                            | 1.01(0.41-2.51)     | MODERATE                                | LOW                                       | 1.09(0.54-2.22)      | 0.74                                                       | None                                                         | MODERATE    | 15 more (from 84 fewer to 161 more)                         |
| IBUIVHIGHDOSE                                                                                       | —                         | —                                      | —                                 | —                   | —                                       | MODERATE                                  | 0.57(0.12-2.64)      | —                                                          | None                                                         | MODERATE    | 78 fewer (from 179 fewer to 202 more)                       |
| IBUPOHIGHDOSE                                                                                       | 1                         | 9/30                                   | 11/30                             | 0.74(0.21-2.58)     | MODERATE                                | NOT ESTIMABLE                             | 0.73(0.23-2.18)      | NA                                                         | None                                                         | MODERATE    | 47 fewer (from 152 fewer to 157 more)                       |
| IBUIVCONT                                                                                           | —                         | —                                      | —                                 | —                   | —                                       | LOW                                       | 0.67(0.16-2.58)      | —                                                          | None                                                         | LOW         | 59 fewer (from 169 fewer to 196 more)                       |
| INDOIVCONT                                                                                          | —                         | —                                      | —                                 | —                   | —                                       | LOW                                       | 1.28(0.01-1343)      | —                                                          | Rated down (imprecision)                                     | VERY LOW    | 44 more (from 207 fewer to 788 more)                        |
| INDOTHERS                                                                                           | 2                         | 8/29                                   | 6/30                              | 1.55(0.38-6.17)     | LOW                                     | VERY LOW                                  | 1.47(0.68-3.36)      | 0.96                                                       | None                                                         | VERY LOW    | 71 more (from 57 fewer to 261 more)                         |
| PLAC_NORX                                                                                           | 3                         | 35/96                                  | 28/96                             | 1.44(0.70-3.00)     | VERY LOW                                | LOW                                       | 1.08(0.64-1.79)      | 0.25                                                       | None                                                         | LOW         | 13 more (from 64 fewer to 112 more)                         |
| versus PARAPO (PARAPO)                                                                              |                           |                                        |                                   |                     |                                         |                                           |                      |                                                            |                                                              |             | ACR PARAPO 22/162 (13.6%)                                   |
| IBUIVHIGHDOSE                                                                                       | —                         | —                                      | —                                 | —                   | —                                       | MODERATE                                  | 0.52(0.10-2.69)      | —                                                          | None                                                         | MODERATE    | 60 fewer (from 120 fewer to 161 more)                       |
| IBUPOHIGHDOSE                                                                                       | —                         | —                                      | —                                 | —                   | —                                       | LOW                                       | 0.67(0.17-2.48)      | —                                                          | None                                                         | LOW         | 41 fewer (from 110 fewer to 145 more)                       |
| IBUIVCONT                                                                                           | —                         | —                                      | —                                 | —                   | —                                       | LOW                                       | 0.61(0.12-2.81)      | —                                                          | None                                                         | LOW         | 48 fewer (from 117 fewer to 171 more)                       |
| INDOIVCONT                                                                                          | —                         | —                                      | —                                 | —                   | —                                       | LOW                                       | 1.17(0.00-1299)      | —                                                          | Rated down (imprecision)                                     | VERY LOW    | 20 more (from – to 859 more)*                               |
| INDOTHERS                                                                                           | —                         | —                                      | —                                 | —                   | —                                       | LOW                                       | 1.35(0.51-3.64)      | —                                                          | None                                                         | LOW         | 39 more (from 62 fewer to 228 more)                         |
| PLAC_NORX                                                                                           | —                         | —                                      | —                                 | —                   | —                                       | MODERATE                                  | 0.98(0.43-2.27)      | —                                                          | None                                                         | MODERATE    | 2 fewer (from 73 fewer to 127 more)                         |
| versus IBUIVHIGHDOSE (IBUIVHIGHDOSE)                                                                |                           |                                        |                                   |                     |                                         |                                           |                      |                                                            |                                                              |             | ACR IBUIVHIGHDOSE 4/35 (11.4%)                              |
| IBUPOHIGHDOSE                                                                                       | —                         | —                                      | —                                 | —                   | —                                       | MODERATE                                  | 1.29(0.19-8.48)      | —                                                          | None                                                         | MODERATE    | 28 more (from 90 fewer to 408 more)                         |
| IBUIVCONT                                                                                           | —                         | —                                      | —                                 | —                   | —                                       | LOW                                       | 1.17(0.17-8.00)      | —                                                          | None                                                         | LOW         | 17 more (from 93 fewer to 394 more)                         |
| INDOIVCONT                                                                                          | —                         | —                                      | —                                 | —                   | —                                       | LOW                                       | 2.29(0.01-2484)      | —                                                          | Rated down (imprecision)                                     | VERY LOW    | 114 more (from 113 fewer to 883 more)                       |
| INDOTHERS                                                                                           | —                         | —                                      | —                                 | —                   | —                                       | LOW                                       | 2.61(0.50-14.24)     | —                                                          | Rated down (imprecision)                                     | VERY LOW    | 138 more (from 54 fewer to 533 more)                        |
| PLAC_NORX                                                                                           | —                         | —                                      | —                                 | —                   | —                                       | MODERATE                                  | 1.90(0.40-9.17)      | —                                                          | None                                                         | MODERATE    | 83 more (from 65 fewer to 428 more)                         |

**eTable 17. GRADE assessment of the Quality of Evidence (QoE) for the network for risk of IVH**

| Treatment Comparison                        | No. of direct comparisons | Events in the intervention group (n/N) | Events in the control group (n/N) | Direct OR (95% CrI) | QoE (GRADE) based on direct comparisons | QoE (GRADE) based on indirect comparisons | Network OR (95% CrI) | Inconsistency assessment (based on node splitting p value) | Changes in GRADE assessment based on precision & effect size | Network QoE | Network absolute risk difference per 1000 (95% CrI) infants |
|---------------------------------------------|---------------------------|----------------------------------------|-----------------------------------|---------------------|-----------------------------------------|-------------------------------------------|----------------------|------------------------------------------------------------|--------------------------------------------------------------|-------------|-------------------------------------------------------------|
| <b>(Continued.....)</b>                     |                           |                                        |                                   |                     |                                         |                                           |                      |                                                            |                                                              |             |                                                             |
| <i>versus</i> IBUPOHIGHDOSE (IBUPOHIGHDOSE) |                           |                                        |                                   |                     |                                         |                                           |                      |                                                            |                                                              |             |                                                             |
| IBUIVCONT                                   | —                         | —                                      | —                                 | —                   | —                                       | LOW                                       | 0.91(0.15-5.54)      | —                                                          | None                                                         | LOW         | 19 fewer (from 240 fewer to 404 more)                       |
| INDOIVCONT                                  | —                         | —                                      | —                                 | —                   | —                                       | LOW                                       | 1.78(0.01-2077)      | —                                                          | Rated down (imprecision)                                     | VERY LOW    | 133 more (from 296 fewer to 699 more)                       |
| INDOTHERS                                   | —                         | —                                      | —                                 | —                   | —                                       | LOW                                       | 2.04(0.54-8.06)      | —                                                          | None                                                         | LOW         | 166 more (from 112 fewer to 475 more)                       |
| PLAC_NORX                                   | —                         | —                                      | —                                 | —                   | —                                       | LOW                                       | 1.48(0.43-5.22)      | —                                                          | None                                                         | LOW         | 88 more (from 144 fewer to 391 more)                        |
| <i>versus</i> IBUIVCONT (IBUIVCONT)         |                           |                                        |                                   |                     |                                         |                                           |                      |                                                            |                                                              |             |                                                             |
| INDOIVCONT                                  | —                         | —                                      | —                                 | —                   | —                                       | LOW                                       | 1.99(0.01-2354)      | —                                                          | Rated down (imprecision)                                     | VERY LOW    | 75 more (from 90 fewer to 905 more)                         |
| INDOTHERS                                   | —                         | —                                      | —                                 | —                   | —                                       | LOW                                       | 2.24(0.48-11.08)     | —                                                          | Rated down (imprecision)                                     | VERY LOW    | 92 more (from 45 fewer to 435 more)                         |
| PLAC_NORX                                   | —                         | —                                      | —                                 | —                   | —                                       | LOW                                       | 1.61(0.41-6.95)      | —                                                          | None                                                         | LOW         | 48 more (from 52 fewer to 319 more)                         |
| <i>versus</i> INDOIVCONT (INDOIVCONT)       |                           |                                        |                                   |                     |                                         |                                           |                      |                                                            |                                                              |             |                                                             |
| INDOTHERS                                   | —                         | —                                      | —                                 | —                   | —                                       | LOW                                       | 1.15(0.00-288)       | —                                                          | Rated down (imprecision)                                     | VERY LOW    | 4 more (from – to 864 more)*                                |
| PLAC_NORX                                   | —                         | —                                      | —                                 | —                   | —                                       | LOW                                       | 0.84(0.00-218)       | —                                                          | Rated down (imprecision)                                     | VERY LOW    | 4 fewer (from – to 834 more)*                               |
| <i>versus</i> INDOTHERS (INDOTHERS)         |                           |                                        |                                   |                     |                                         |                                           |                      |                                                            |                                                              |             |                                                             |
| PLAC_NORX                                   | —                         | —                                      | —                                 | —                   | —                                       | LOW                                       | 0.73(0.31-1.70)      | —                                                          | None                                                         | LOW         | 57 fewer (from 115 more to 164 fewer)                       |

Abbreviations: NA: Not Applicable; QoE: Quality of Evidence; OR: Odds Ratio; CrI: Credible Intervals; ACR: Assumed control risk  
 \*The lower limit of the 95% credible interval for absolute risk difference could not be computed due to the very low (tending to zero) lower limit of the 95% credible interval for the corresponding network odds ratio  
 \*\*In view of zero event rate for the particular outcome in the control group, a continuity correction of 0.5 has been applied to calculate the assumed control risk in order to compute the absolute risk difference

**eFigure 17. Ranking probability (rankogram) of each treatment modality for risk of IVH**

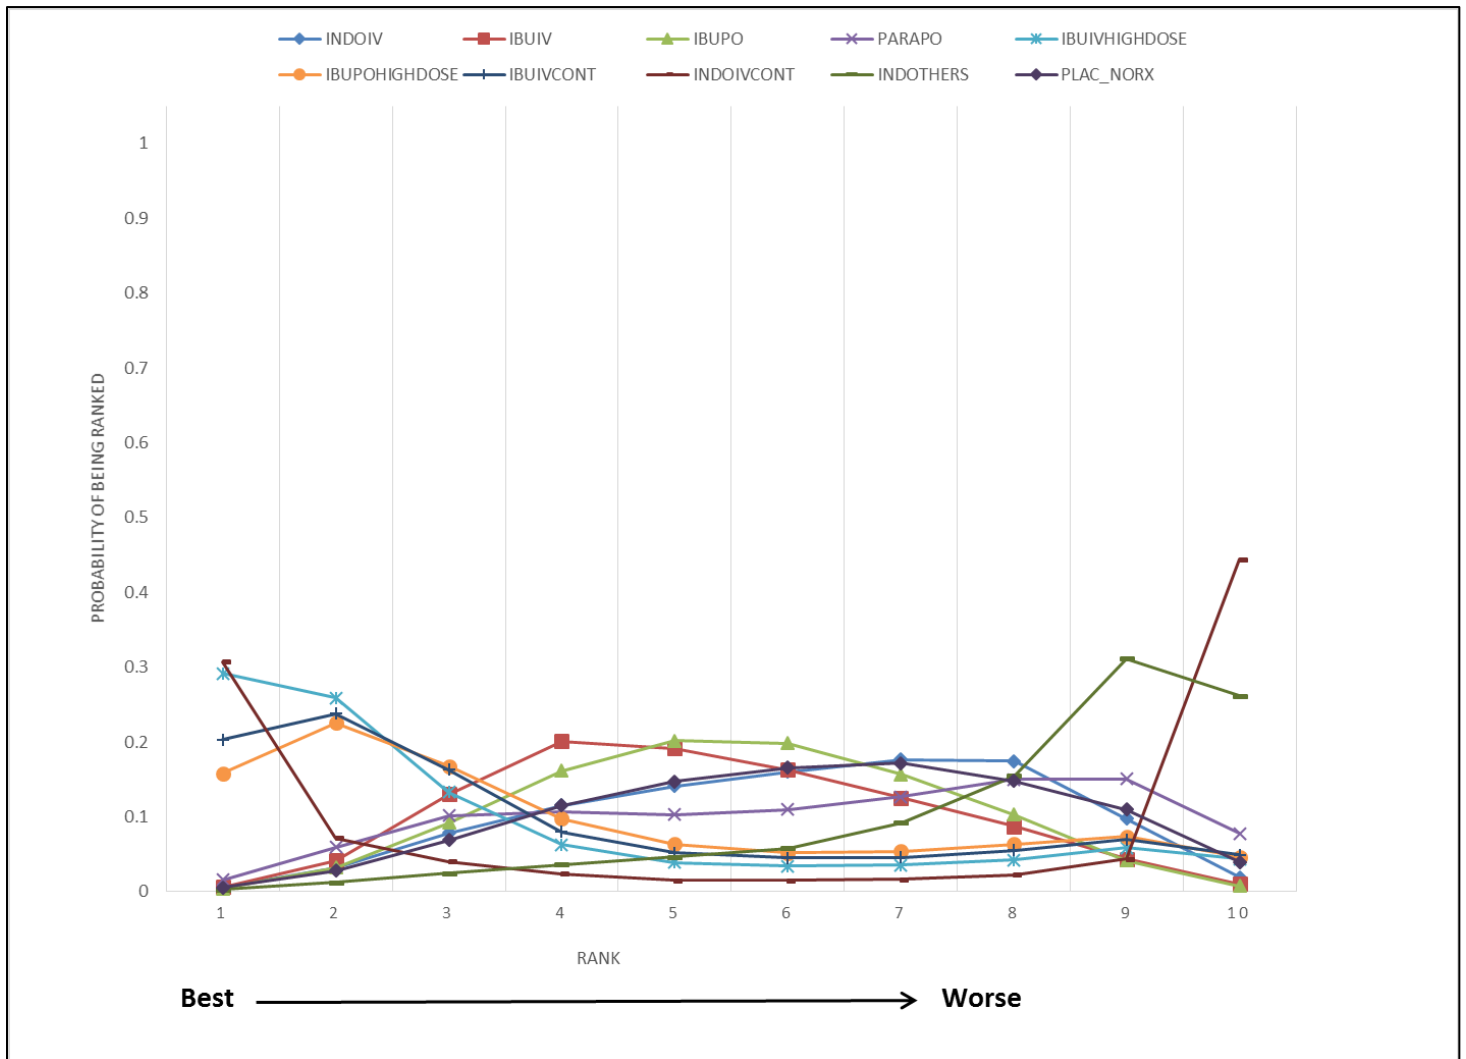

eFigure 17. Each line indicates a treatment modality. The horizontal x-axis represents the ranking of strategies in which the first through 10<sup>th</sup> modalities are ranked in numerical order, with the first representing the best strategy. The vertical y-axis represents the probability of each ranking.

**eTable 18. Ranking statistics for each treatment modality for risk of IVH**

| Risk of Intra-ventricular Hemorrhage |                                 |                                      |
|--------------------------------------|---------------------------------|--------------------------------------|
| Treatment                            | SUCRA mean (Standard Deviation) | Median rank (95% Credible Intervals) |
| INDOIV                               | 0.43 (0.22)                     | 6 (2-9)                              |
| IBUIV                                | 0.52 (0.21)                     | 5 (2-9)                              |
| IBUPO                                | 0.49 (0.20)                     | 6 (2-9)                              |
| PARAPO                               | 0.42 (0.27)                     | 7 (2-10)                             |
| IBUIVHIGHDOSE                        | 0.73 (0.31)                     | 2 (1-10)                             |
| IBUPOHIGHDOSE                        | 0.65 (0.31)                     | 3 (1-10)                             |
| IBUIVCONT                            | 0.68 (0.31)                     | 3 (1-10)                             |
| INDOIVCONT                           | 0.45 (0.46)                     | 8 (1-10)                             |
| INDOTHERS                            | 0.21 (0.22)                     | 9 (3-10)                             |
| PLAC_NORX                            | 0.42 (0.23)                     | 6 (2-10)                             |

**eFigure 18. Network meta-analysis forest plots for outcome: Risk of Oliguria**

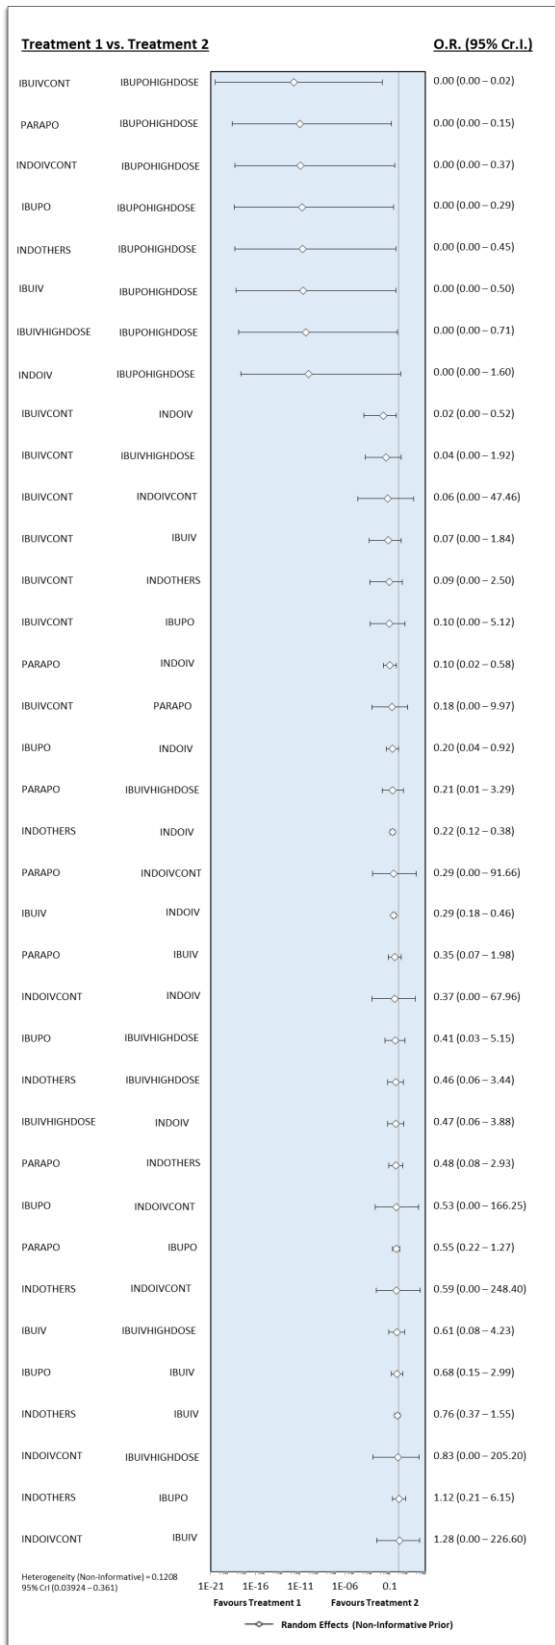

eFigure 18. Forest plot showing network effect estimates (OR with 95% credible intervals) for each possible treatment comparison in the network for risk of oliguria computed using Bayesian RE model with non-informative priors; the horizontal axis denotes network odds ratios (with 95% credible intervals)



**eTable 19. GRADE assessment of the Quality of Evidence (QoE) for the network for risk of oliguria**

| eTable 19. GRADE assessment of the Quality of Evidence (QoE) for the network for risk of oliguria |                           |                                        |                                      |                         |                                         |                                           |                         |                                                            |                                                              |             |                                                             |
|---------------------------------------------------------------------------------------------------|---------------------------|----------------------------------------|--------------------------------------|-------------------------|-----------------------------------------|-------------------------------------------|-------------------------|------------------------------------------------------------|--------------------------------------------------------------|-------------|-------------------------------------------------------------|
| Treatment Comparison                                                                              | No. of direct comparisons | Events in the intervention group (n/N) | Events in the comparison group (n/N) | Direct OR (95% CrI)     | QoE (GRADE) based on direct comparisons | QoE (GRADE) based on indirect comparisons | Network OR (95% CrI)    | Inconsistency assessment (based on node splitting p value) | Changes in GRADE assessment based on precision & effect size | Network QoE | Network absolute risk difference per 1000 (95% CrI) infants |
| versus INDOIV (INDOIV)                                                                            |                           |                                        |                                      |                         |                                         |                                           |                         |                                                            |                                                              |             | ACR INDOIV 143/734 (19.5%)                                  |
| IBUIV                                                                                             | 9                         | 27/384                                 | 75/373                               | 0.25(0.13-0.48)         | MODERATE                                | MODERATE                                  | 0.29(0.18-0.46)         | <0.01                                                      | High precision; network inconsistency; no change in GRADE    | MODERATE    | 129 fewer (from 95 fewer to 153 fewer)                      |
| IBUPO                                                                                             | —                         | —                                      | —                                    | —                       | LOW                                     | MODERATE                                  | 0.20(0.04-0.92)         | —                                                          | None                                                         | MODERATE    | 149 fewer (from 13 fewer to 185 fewer)                      |
| PARAPO                                                                                            | 1                         | 1/38                                   | 0/39                                 | 9.54E+17 (34.2-8.3E+40) | MODERATE                                | LOW                                       | 0.10(0.02-0.58)         | <0.01                                                      | network inconsistency                                        | VERY LOW    | 171 fewer (from 72 fewer to 190 fewer)                      |
| IBUIVHIGHDOSE                                                                                     | —                         | —                                      | —                                    | —                       | —                                       | MODERATE                                  | 0.47(0.06-3.88)         | —                                                          | Rated down (imprecision)                                     | LOW         | 93 fewer (from 181 fewer to 289 more)                       |
| IBUPOHIGHDOSE                                                                                     | —                         | —                                      | —                                    | —                       | —                                       | LOW                                       | 1.15E+10(0.62-4.34E+17) | —                                                          | Rated down (imprecision)                                     | VERY LOW    | 805 more (from 64 fewer to 805 more)                        |
| IBUIVCONT                                                                                         | —                         | —                                      | —                                    | —                       | —                                       | LOW                                       | 0.02(0.00-0.52)         | —                                                          | None                                                         | LOW         | 190 fewer (up to 83 fewer)*                                 |
| INDOIVCONT                                                                                        | —                         | —                                      | —                                    | —                       | —                                       | LOW                                       | 0.37(0.00-67.96)        | —                                                          | Rated down (imprecision)                                     | VERY LOW    | 113 fewer (from – to 748 more)*                             |
| INDOTHERS                                                                                         | 6                         | 23/325                                 | 68/322                               | 0.22 (0.10-0.44)        | LOW                                     | MODERATE                                  | 0.22(0.12-0.38)         | 0.8                                                        | Rated up (high precision; large effect)                      | HIGH        | 144 fewer (from 111 fewer to 167 fewer)                     |
| versus IBUIV (IBUIV)                                                                              |                           |                                        |                                      |                         |                                         |                                           |                         |                                                            |                                                              |             | ACR IBUIV 34/655 (5.2%)                                     |
| IBUPO                                                                                             | 4                         | 0/156                                  | 3/148                                | 0.26(0.02-2.34)         | HIGH                                    | LOW                                       | 0.68(0.15-2.99)         | <0.01                                                      | network inconsistency                                        | VERY LOW    | 16 fewer (from 44 fewer to 89 more)                         |
| PARAPO                                                                                            | —                         | —                                      | —                                    | —                       | —                                       | MODERATE                                  | 0.35(0.07-1.98)         | —                                                          | Rated down (imprecision)                                     | LOW         | 33 fewer (from 46 more to 48 fewer)                         |
| IBUIVHIGHDOSE                                                                                     | 1                         | 3/35                                   | 2/35                                 | 1.70(0.21-17.03)        | MODERATE                                | NOT ESTIMABLE                             | 1.64(0.24-11.85)        | NA                                                         | Rated down (imprecision)                                     | LOW         | 30 more (from 39 fewer to 342 more)                         |
| IBUPOHIGHDOSE                                                                                     | —                         | —                                      | —                                    | —                       | —                                       | MODERATE                                  | 4.53E+10(1.99-1.37E+18) | —                                                          | Rated up (large effect)                                      | HIGH        | 948 more (from 46 more to 948 more)                         |
| IBUIVCONT                                                                                         | 1                         | 0/55                                   | 2/56                                 | 0.10(0.00-3.43)         | LOW                                     | NOT ESTIMABLE                             | 0.07(0.00-1.84)         | NA                                                         | Rated down (imprecision)                                     | VERY LOW    | 48 fewer (from – to 40 more)*                               |
| INDOIVCONT                                                                                        | 1                         | 0/31                                   | 0/32                                 | 0.92(0.00-246)          | LOW                                     | NOT ESTIMABLE                             | 1.28(0.00-226.60)       | NA                                                         | Rated down (imprecision)                                     | VERY LOW    | 14 more (from – to 874 more)*                               |
| INDOTHERS                                                                                         | —                         | —                                      | —                                    | —                       | —                                       | LOW                                       | 0.76(0.37-1.55)         | —                                                          | None                                                         | LOW         | 12 fewer (from 26 more to 32 fewer)                         |
| versus IBUPO (IBUPO)                                                                              |                           |                                        |                                      |                         |                                         |                                           |                         |                                                            |                                                              |             | ACR IBUPO 15/367 (4.1%)                                     |
| PARAPO                                                                                            | 3                         | 7/164                                  | 15/163                               | 0.42(0.12-1.21)         | MODERATE                                | LOW                                       | 0.55(0.22-1.27)         | <0.01                                                      | None                                                         | LOW         | 18 fewer (from 10 more to 32 fewer)                         |
| IBUIVHIGHDOSE                                                                                     | —                         | —                                      | —                                    | 3.676642604             | —                                       | MODERATE                                  | 2.45(0.19-33.70)        | —                                                          | Rated down (imprecision)                                     | LOW         | 54 more (from 33 fewer to 549 more)                         |
| IBUPOHIGHDOSE                                                                                     | 1                         | 1/30                                   | 0/30                                 | 1.02E+14(178-6.59E+36)  | MODERATE                                | NOT ESTIMABLE                             | 5.71E+10(3.48-2.20E+18) | NA                                                         | Rated up (large effect)                                      | HIGH        | 959 more (from 88 more to 959 more)                         |
| IBUIVCONT                                                                                         | —                         | —                                      | —                                    | —                       | —                                       | LOW                                       | 0.10(0.00-5.12)         | —                                                          | Rated down (imprecision)                                     | VERY LOW    | 37 fewer (from – to 138 more)*                              |
| INDOIVCONT                                                                                        | —                         | —                                      | —                                    | —                       | —                                       | LOW                                       | 1.87(0.01-415.80)       | —                                                          | Rated down (imprecision)                                     | VERY LOW    | 33 more (from 40 fewer to 906 more)                         |
| INDOTHERS                                                                                         | 1                         | 0/18                                   | 0/18                                 | 0.78(0.00-303)          | LOW                                     | VERY LOW                                  | 1.12(0.21-6.15)         | 0.25                                                       | None                                                         | VERY LOW    | 5 more (from 32 fewer to 167 more)                          |
| versus PARAPO (PARAPO)                                                                            |                           |                                        |                                      |                         |                                         |                                           |                         |                                                            |                                                              |             | ACR PARAPO 8/202 (4%)                                       |
| IBUIVHIGHDOSE                                                                                     | —                         | —                                      | —                                    | —                       | —                                       | MODERATE                                  | 4.71(0.30-71.49)        | —                                                          | Rated down (imprecision)                                     | LOW         | 123 more (from 27 fewer to 707 more)                        |
| IBUPOHIGHDOSE                                                                                     | —                         | —                                      | —                                    | —                       | —                                       | LOW                                       | 1.12E+11(6.51-4.06E+18) | —                                                          | Rated up (large effect)                                      | MODERATE    | 960 more (from 172 more to 960 more)                        |
| IBUIVCONT                                                                                         | —                         | —                                      | —                                    | —                       | —                                       | LOW                                       | 0.18(0.00-9.97)         | —                                                          | Rated down (imprecision)                                     | VERY LOW    | 32 fewer (from – to 252 more)*                              |
| INDOIVCONT                                                                                        | —                         | —                                      | —                                    | —                       | —                                       | LOW                                       | 3.43(0.01-866.40)       | —                                                          | Rated down (imprecision)                                     | VERY LOW    | 84 more (from 39 fewer to 933 more)                         |
| INDOTHERS                                                                                         | —                         | —                                      | —                                    | —                       | —                                       | LOW                                       | 2.10(0.34-13.05)        | —                                                          | Rated down (imprecision)                                     | VERY LOW    | 40 more (from 26 fewer to 310 more)                         |
| versus IBUIVHIGHDOSE (IBUIVHIGHDOSE)                                                              |                           |                                        |                                      |                         |                                         |                                           |                         |                                                            |                                                              |             | ACR IBUIVHIGHDOSE 3/35 (8.6%)                               |
| IBUPOHIGHDOSE                                                                                     | —                         | —                                      | —                                    | —                       | —                                       | MODERATE                                  | 2.43E+10(1.40-7.54E+17) | —                                                          | Rated up (large effect)                                      | HIGH        | 914 more (from 30 more to 914 more)                         |
| IBUIVCONT                                                                                         | —                         | —                                      | —                                    | —                       | —                                       | LOW                                       | 0.04(0.00-1.92)         | —                                                          | Rated down (imprecision)                                     | VERY LOW    | 82 fewer (from – to 67 more)*                               |
| INDOIVCONT                                                                                        | —                         | —                                      | —                                    | —                       | —                                       | LOW                                       | 0.83(0.00-205.20)       | —                                                          | Rated down (imprecision)                                     | VERY LOW    | 14 fewer (from – to 865 more)*                              |

**eTable 19. GRADE assessment of the Quality of Evidence (QoE) for the network for risk of oliguria**

| Treatment Comparison                 | No. of direct comparisons | Events in the intervention group (n/N) | Events in the comparison group (n/N) | Direct OR (95% CrI) | QoE (GRADE) based on direct comparisons | QoE (GRADE) based on indirect comparisons | Network OR (95% CrI) | Inconsistency assessment (based on node splitting p value) | Changes in GRADE assessment based on precision & effect size | Network QoE | Network absolute risk difference per 1000 (95% CrI) infants |
|--------------------------------------|---------------------------|----------------------------------------|--------------------------------------|---------------------|-----------------------------------------|-------------------------------------------|----------------------|------------------------------------------------------------|--------------------------------------------------------------|-------------|-------------------------------------------------------------|
| <b>(Continued.....)</b>              |                           |                                        |                                      |                     |                                         |                                           |                      |                                                            |                                                              |             |                                                             |
| INDOTHERS                            | —                         | —                                      | —                                    | —                   | —                                       | LOW                                       | 0.46(0.06-3.44)      | —                                                          | Rated down (imprecision)                                     | VERY LOW    | 44 fewer (from 80 fewer to 158 more)                        |
| versus IBUPOHIGHDOSE (IBUPOHIGHDOSE) |                           |                                        |                                      |                     |                                         |                                           |                      |                                                            |                                                              |             | ACR IBUPOHIGHDOSE 1/30 (3.3%)                               |
| IBUIVCONT                            | —                         | —                                      | —                                    | —                   | —                                       | LOW                                       | 0.00(0.00-0.02)      | —                                                          | Rated up (large effect)                                      | MODERATE    | -- (up to 33 fewer)***                                      |
| INDOIVCONT                           | —                         | —                                      | —                                    | —                   | —                                       | LOW                                       | 0.00(0.00-0.37)      | —                                                          | Rated up (large effect)                                      | MODERATE    | -- (up to 21 fewer)***                                      |
| INDOTHERS                            | —                         | —                                      | —                                    | —                   | —                                       | LOW                                       | 0.00(0.00-0.45)      | —                                                          | Rated up (large effect)                                      | MODERATE    | -- (up to 18 fewer)***                                      |
| versus IBUIVCONT (IBUIVCONT)         |                           |                                        |                                      |                     |                                         |                                           |                      |                                                            |                                                              |             | ACR IBUIVCONT 0/55 (0%)**                                   |
| INDOIVCONT                           | —                         | —                                      | —                                    | —                   | —                                       | LOW                                       | 17.44(0.02-36280.00) | —                                                          | Rated down (imprecision)                                     | VERY LOW    | 129 more (from 9 fewer to 988 more)                         |
| INDOTHERS                            | —                         | —                                      | —                                    | —                   | —                                       | LOW                                       | 11.13(0.40-1693.00)  | —                                                          | Rated down (imprecision)                                     | VERY LOW    | 84 more (from 5 fewer to 930 more)                          |
| versus INDOIVCONT (INDOIVCONT)       |                           |                                        |                                      |                     |                                         |                                           |                      |                                                            |                                                              |             | ACR INDOIVCONT 0/31 (0%)**                                  |
| INDOTHERS                            | —                         | —                                      | —                                    | —                   | —                                       | LOW                                       | 0.59(0.00-248.40)    | —                                                          | Rated down (imprecision)                                     | VERY LOW    | 7 fewer (from – to 787 more)*                               |

Abbreviations: NA: Not Applicable; QoE: Quality of Evidence; OR: Odds Ratio; CrI: Credible Intervals; ACR: Assumed control risk  
 \*The lower limit of the 95% credible interval for absolute risk difference could not be computed due to the very low (tending to zero) lower limit of the 95% credible interval for the corresponding network odds ratio  
 \*\*In view of zero event rate for the particular outcome in the control group, a continuity correction of 0.5 has been applied to calculate the assumed control risk in order to compute the absolute risk difference  
 \*\*\*The absolute risk difference could not be computed due to very low (tending to zero) network odds ratio

**eFigure 19. Ranking probability (rankogram) of each treatment modality for risk of oliguria**

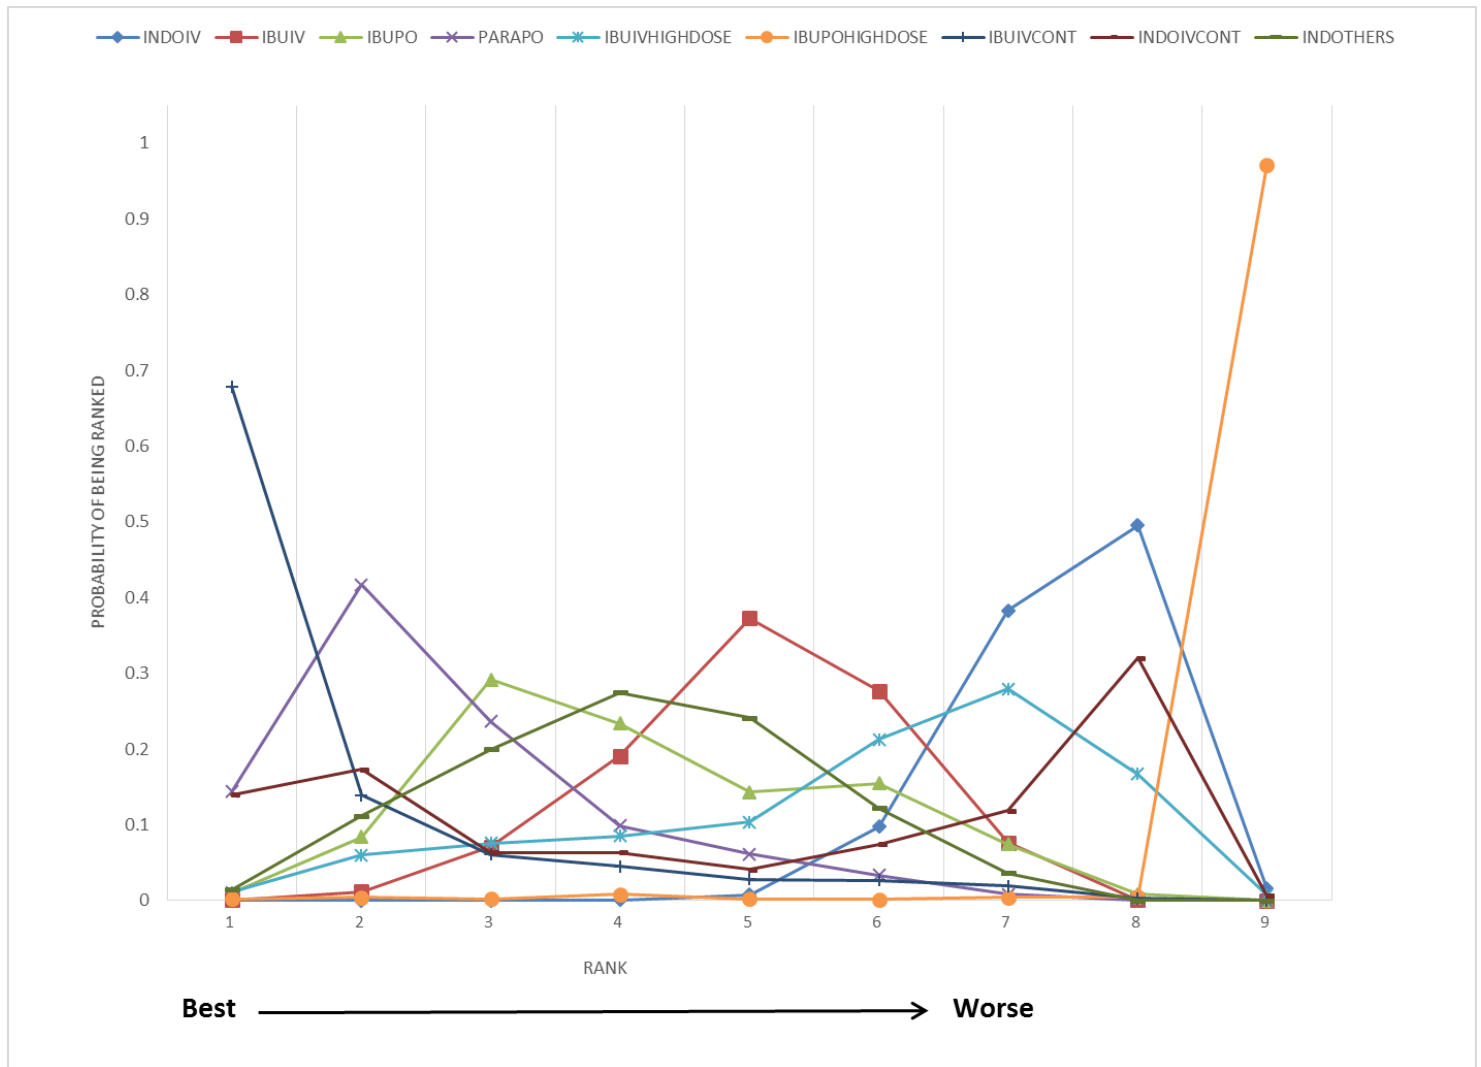

eFigure 19. Each line indicates a treatment modality. The horizontal x-axis represents the ranking of strategies in which the first through 9<sup>th</sup> modalities are ranked in numerical order, with the first representing the best strategy. The vertical y-axis represents the probability of each ranking.

**eTable 20. Ranking statistics for each treatment modality for risk of oliguria**

| Risk of oliguria |                                 |                                      |
|------------------|---------------------------------|--------------------------------------|
| Treatment        | SUCRA mean (Standard Deviation) | Median rank (95% Credible Intervals) |
| INDOIV           | 0.20 (0.09)                     | 8 (6-8)                              |
| IBUIV            | 0.49 (0.14)                     | 5 (3-7)                              |
| IBUPO            | 0.60 (0.19)                     | 4 (2-7)                              |
| PARAPO           | 0.79 (0.16)                     | 2 (1-6)                              |
| IBUIVHIGHDOSE    | 0.40 (0.23)                     | 6 (2-8)                              |
| IBUPOHIGHDOSE    | 0.02 (0.10)                     | 9 (8-9)                              |
| IBUIVCONT        | 0.90 (0.18)                     | 1 (1-6)                              |
| INDOIVCONT       | 0.50 (0.35)                     | 6 (1-8)                              |
| INDOTHERS        | 0.61 (0.17)                     | 4 (2-7)                              |

**eTable 21. Network effect estimates for PDA closure on sensitivity analysis ('low' & 'probably low' risk of bias studies)**

|                         |                         |                         |                        |                        |                        |                        |                       |                        |                  |  |
|-------------------------|-------------------------|-------------------------|------------------------|------------------------|------------------------|------------------------|-----------------------|------------------------|------------------|--|
| <b>IBUPOHIGHDOSE</b>    |                         |                         |                        |                        |                        |                        |                       |                        |                  |  |
| 1.15<br>(0.46 – 2.97)   | <b>PARAPO</b>           |                         |                        |                        |                        |                        |                       |                        |                  |  |
| 1.15<br>(0.17 – 7.55)   | 1.00<br>(0.16 – 6.24)   | <b>IBUIVHIGHDOSE</b>    |                        |                        |                        |                        |                       |                        |                  |  |
| 1.81<br>(0.77 – 4.46)   | 1.58<br>(0.74 – 3.46)   | 1.58<br>(0.30 – 8.53)   | <b>IBUPO</b>           |                        |                        |                        |                       |                        |                  |  |
| 2.18<br>(0.70 – 6.49)   | 1.88<br>(0.67 – 5.03)   | 1.86<br>(0.34 – 10.23)  | 1.18<br>(0.57 – 2.36)  | <b>INDOTHERS</b>       |                        |                        |                       |                        |                  |  |
| 2.33<br>(0.80 – 6.91)   | 2.02<br>(0.78 – 5.32)   | 2.01<br>(0.41 – 10.48)  | 1.28<br>(0.66 – 2.42)  | 1.08<br>(0.60 – 2.02)  | <b>INDOIV</b>          |                        |                       |                        |                  |  |
| 3.23<br>(0.75 – 14.95)  | 2.82<br>(0.70 – 12.03)  | 2.86<br>(0.43 – 19.72)  | 1.78<br>(0.54 – 6.23)  | 1.51<br>(0.45 – 5.44)  | 1.40<br>(0.47 – 4.33)  | <b>INDOIVCONT</b>      |                       |                        |                  |  |
| 4.34<br>(1.52 – 12.78)  | 3.77<br>(1.47 – 10.04)  | 3.76<br>(0.83 – 18.23)  | 2.39<br>(1.30 – 4.49)  | 2.01<br>(1.04 – 4.12)  | 1.86<br>(1.19 – 3.01)  | 1.33<br>(0.44 – 3.92)  | <b>IBUIV</b>          |                        |                  |  |
| 6.00<br>(1.21 – 31.95)  | 5.18<br>(1.12 – 25.40)  | 5.21<br>(0.76 – 38.40)  | 3.32<br>(0.83 – 13.23) | 2.77<br>(0.70 – 11.91) | 2.59<br>(0.69 – 9.71)  | 1.86<br>(0.36 – 9.53)  | 1.39<br>(0.40 – 4.75) | <b>IBUIVCONT</b>       |                  |  |
| 15.85<br>(5.34 – 49.75) | 13.82<br>(5.07 – 38.65) | 13.78<br>(2.66 – 77.16) | 8.72<br>(4.44 – 17.47) | 7.36<br>(3.98 – 14.56) | 6.82<br>(3.81 – 12.75) | 4.88<br>(1.44 – 16.32) | 3.67<br>(1.93 – 6.95) | 2.63<br>(0.66 – 10.75) | <b>PLAC_NORX</b> |  |

Network effect estimates (Odds ratio with 95% credible intervals) for each possible treatment comparison in the network for PDA closure computed using Bayesian random effects model with non-informative priors. For each outcome, the treatment on the top left corner indicates the best treatment option and the one on the bottom right indicates the worst treatment option based on mean SUCRA values

**eFigure 20. Rankogram for PDA closure on sensitivity analysis ('low' & 'probably low' risk of bias studies)**

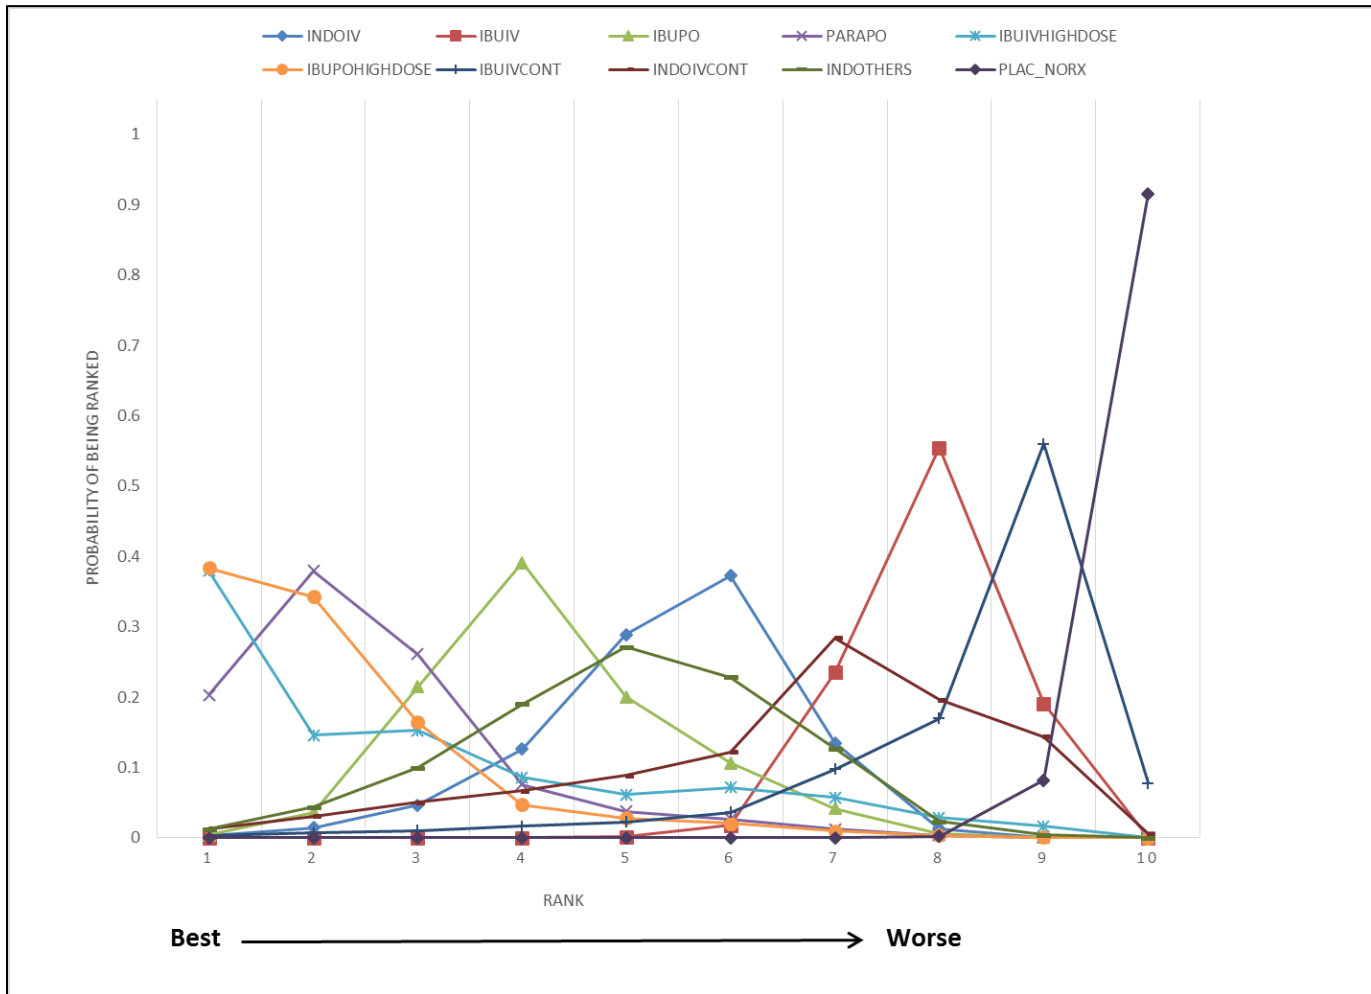

**eTable 22. Ranking statistics for PDA closure on sensitivity analysis ('low' & 'probably low' risk of bias studies)**

| PDA closure   |                                 |                                      |
|---------------|---------------------------------|--------------------------------------|
| Treatment     | SUCRA mean (Standard Deviation) | Median rank (95% Credible Intervals) |
| INDOIV        | 0.51 (0.13)                     | 6 (3-7)                              |
| IBUIV         | 0.23 (0.08)                     | 8 (7-9)                              |
| IBUPO         | 0.64 (0.13)                     | 4 (2-7)                              |
| PARAPO        | 0.83 (0.15)                     | 2 (1-6)                              |
| IBUIVHIGHDOSE | 0.78 (0.25)                     | 2 (1-8)                              |
| IBUPOHIGHDOSE | 0.88 (0.15)                     | 2 (1-6)                              |
| IBUIVCONT     | 0.19 (0.16)                     | 9 (4-10)                             |
| INDOIVCONT    | 0.38 (0.22)                     | 7 (2-9)                              |
| INDOTHERS     | 0.56 (0.16)                     | 5 (2-8)                              |
| PLAC_NORX     | 0.01 (0.03)                     | 10 (9-10)                            |

**eTable 23. Network effect estimates for need for repeat pharmacotherapy on sensitivity analysis ('low' & 'probably low' risk of bias studies)**

|                       |                       |                       |                       |                       |                       |                       |                       |                  |  |
|-----------------------|-----------------------|-----------------------|-----------------------|-----------------------|-----------------------|-----------------------|-----------------------|------------------|--|
| <b>PARAPO</b>         |                       |                       |                       |                       |                       |                       |                       |                  |  |
| 1.05<br>(0.20 – 5.93) | <b>IBUIVHIGHDOSE</b>  |                       |                       |                       |                       |                       |                       |                  |  |
| 0.81<br>(0.34 – 2.04) | 0.78<br>(0.12 – 4.71) | <b>IBUPOHIGHDOSE</b>  |                       |                       |                       |                       |                       |                  |  |
| 0.77<br>(0.38 – 1.59) | 0.74<br>(0.15 – 3.33) | 0.95<br>(0.37 – 2.30) | <b>IBUPO</b>          |                       |                       |                       |                       |                  |  |
| 0.66<br>(0.22 – 1.74) | 0.63<br>(0.12 – 2.77) | 0.81<br>(0.23 – 2.48) | 0.84<br>(0.38 – 1.81) | <b>INDOIVCONT</b>     |                       |                       |                       |                  |  |
| 0.47<br>(0.17 – 1.34) | 0.45<br>(0.09 – 1.92) | 0.58<br>(0.17 – 1.90) | 0.61<br>(0.27 – 1.38) | 0.72<br>(0.35 – 1.58) | <b>INDOIV</b>         |                       |                       |                  |  |
| 0.28<br>(0.10 – 0.73) | 0.27<br>(0.06 – 1.00) | 0.34<br>(0.10 – 1.06) | 0.36<br>(0.18 – 0.72) | 0.43<br>(0.22 – 0.89) | 0.60<br>(0.32 – 1.02) | <b>IBUIV</b>          |                       |                  |  |
| 0.07<br>(0.02 – 0.28) | 0.07<br>(0.01 – 0.37) | 0.09<br>(0.02 – 0.37) | 0.10<br>(0.04 – 0.29) | 0.12<br>(0.05 – 0.31) | 0.16<br>(0.06 – 0.45) | 0.27<br>(0.11 – 0.68) | <b>INDOTHERS</b>      |                  |  |
| 0.05<br>(0.00 – 0.38) | 0.05<br>(0.00 – 0.45) | 0.06<br>(0.00 – 0.51) | 0.07<br>(0.01 – 0.43) | 0.08<br>(0.01 – 0.52) | 0.11<br>(0.01 – 0.58) | 0.18<br>(0.02 – 1.14) | 0.67<br>(0.06 – 4.89) | <b>PLAC_NORX</b> |  |

Network effect estimates (Odds ratio with 95% credible intervals) for each possible treatment comparison in the network for need for repeat pharmacotherapy computed using Bayesian random effects model with non-informative priors. For each outcome, the treatment on the top left corner indicates the best treatment option and the one on the bottom right indicates the worst treatment option based on mean SUCRA values

**eFigure 21. Rankogram for need for repeat pharmacotherapy on sensitivity analysis ('low' & 'probably low' risk of bias studies)**

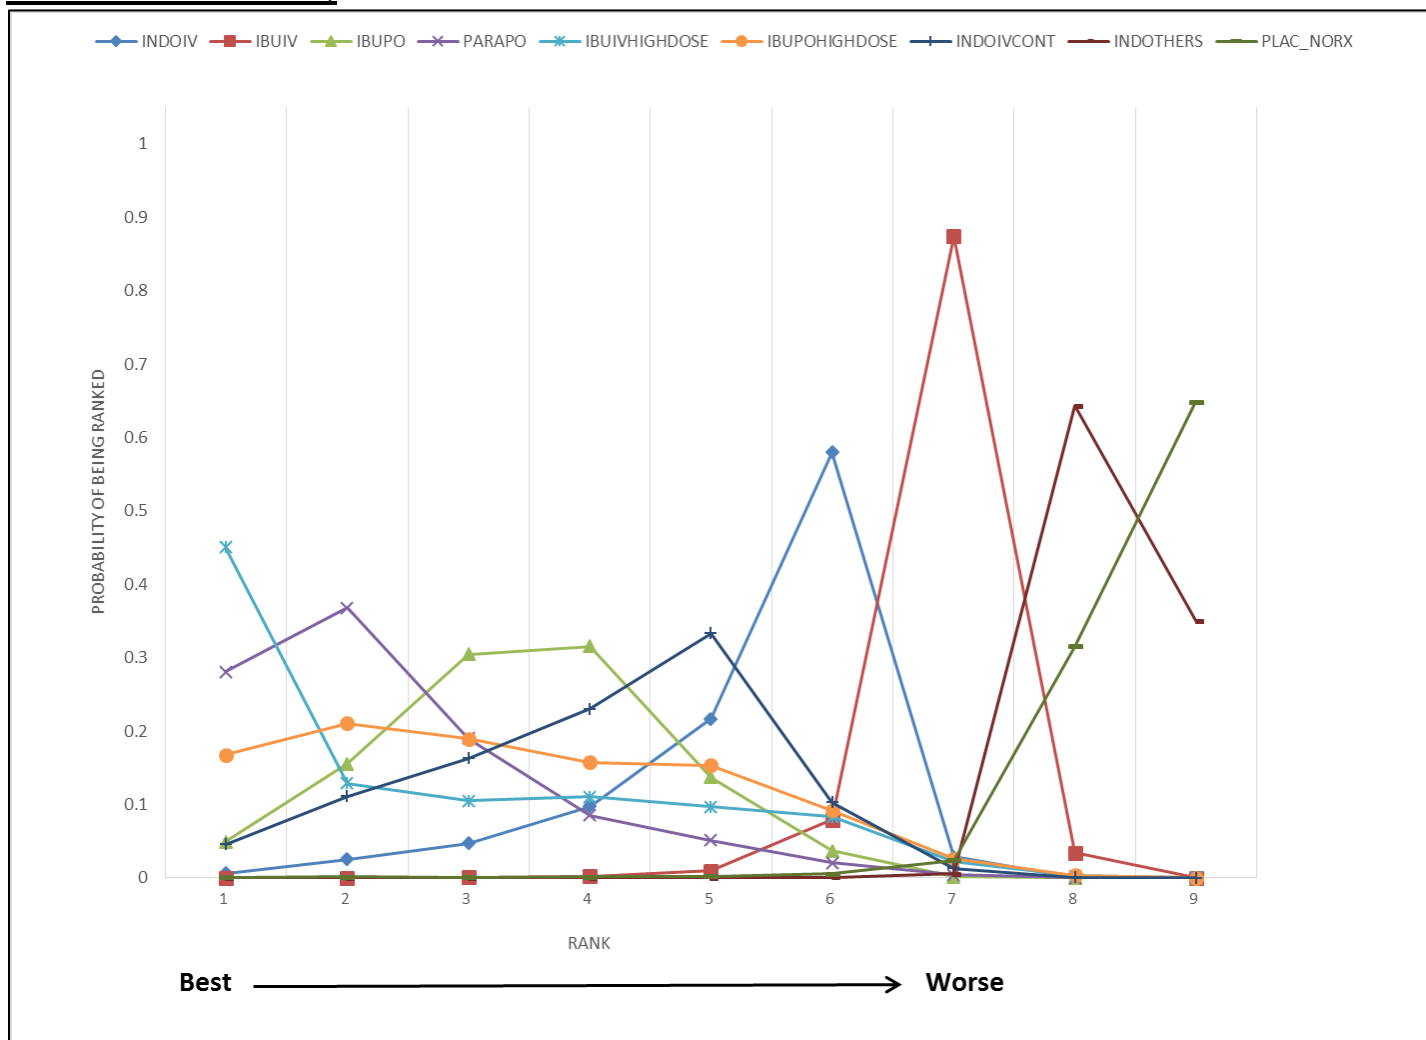

**eTable 24. Ranking statistics for need for repeat pharmacotherapy on sensitivity analysis ('low' & 'probably low' risk of bias studies)**

| Need for repeat pharmacotherapy |                                 |                                      |
|---------------------------------|---------------------------------|--------------------------------------|
| Treatment                       | SUCRA mean (Standard Deviation) | Median rank (95% Credible Intervals) |
| INDOIV                          | 0.46 (0.14)                     | 6 (2-7)                              |
| IBUIV                           | 0.26 (0.05)                     | 7 (6-8)                              |
| IBUPO                           | 0.69 (0.15)                     | 3 (1-6)                              |
| PARAPO                          | 0.83 (0.16)                     | 2 (1-5)                              |
| IBUIVHIGHDOSE                   | 0.80 (0.23)                     | 2 (1-7)                              |
| IBUPOHIGHDOSE                   | 0.71 (0.21)                     | 3 (1-7)                              |
| INDOIVCONT                      | 0.62 (0.17)                     | 4 (1-6)                              |
| INDOTHERS                       | 0.08 (0.06)                     | 8 (8-9)                              |
| PLAC_NORX                       | 0.05 (0.09)                     | 9 (7-9)                              |

**eTable 25. Network effect estimates for need for surgical PDA ligation on sensitivity analysis ('low' & 'probably low' risk of bias studies)**

|                       |                        |                        |                        |                       |                       |                       |                        |                       |           |
|-----------------------|------------------------|------------------------|------------------------|-----------------------|-----------------------|-----------------------|------------------------|-----------------------|-----------|
| IBUPOHIGHDOSE         |                        |                        |                        |                       |                       |                       |                        |                       |           |
| 0.05<br>(0.00 – 2.60) | IBUIVCONT              |                        |                        |                       |                       |                       |                        |                       |           |
| 0.03<br>(0.00 – 0.87) | 0.57<br>(0.08 – 3.85)  | INDOTHERS              |                        |                       |                       |                       |                        |                       |           |
| 0.03<br>(0.00 – 2.95) | 0.71<br>(0.03 – 16.93) | 1.16<br>(0.10 – 18.05) | PARAPO                 |                       |                       |                       |                        |                       |           |
| 0.02<br>(0.00 – 1.83) | 0.54<br>(0.03 – 7.74)  | 0.89<br>(0.09 – 11.48) | 0.72<br>(0.02 – 22.85) | INDOIVCONT            |                       |                       |                        |                       |           |
| 0.02<br>(0.00 – 0.47) | 0.38<br>(0.04 – 2.59)  | 0.65<br>(0.21 – 1.90)  | 0.56<br>(0.04 – 5.50)  | 0.75<br>(0.05 – 7.10) | IBUPO                 |                       |                        |                       |           |
| 0.01<br>(0.00 – 0.44) | 0.29<br>(0.05 – 1.80)  | 0.50<br>(0.21 – 1.31)  | 0.42<br>(0.03 – 5.19)  | 0.56<br>(0.05 – 4.98) | 0.77<br>(0.26 – 2.51) | INDOIV                |                        |                       |           |
| 0.01<br>(0.00 – 0.61) | 0.20<br>(0.01 – 4.09)  | 0.35<br>(0.03 – 4.77)  | 0.31<br>(0.01 – 9.35)  | 0.40<br>(0.01 – 9.22) | 0.54<br>(0.04 – 7.59) | 0.70<br>(0.06 – 8.19) | IBUIVHIGHDOSE          |                       |           |
| 0.01<br>(0.00 – 0.33) | 0.22<br>(0.03 – 1.07)  | 0.37<br>(0.14 – 0.92)  | 0.30<br>(0.02 – 3.64)  | 0.42<br>(0.04 – 3.15) | 0.57<br>(0.19 – 1.66) | 0.75<br>(0.35 – 1.27) | 1.08<br>(0.09 – 10.90) | IBUIV                 |           |
| 0.01<br>(0.00 – 0.24) | 0.13<br>(0.02 – 0.82)  | 0.22<br>(0.10 – 0.48)  | 0.18<br>(0.01 – 2.49)  | 0.24<br>(0.02 – 2.28) | 0.34<br>(0.10 – 1.10) | 0.43<br>(0.17 – 1.01) | 0.62<br>(0.05 – 7.72)  | 0.59<br>(0.24 – 1.52) | PLAC_NORX |

Network effect estimates (Odds ratio with 95% credible intervals) for each possible treatment comparison in the network for need for surgical PDA ligation computed using Bayesian random effects model with non-informative priors. For each outcome, the treatment on the top left corner indicates the best treatment option and the one on the bottom right indicates the worst treatment option based on mean SUCRA values

**eFigure 22. Rankogram for need for surgical PDA ligation on sensitivity analysis ('low' & 'probably low' risk of bias studies)**

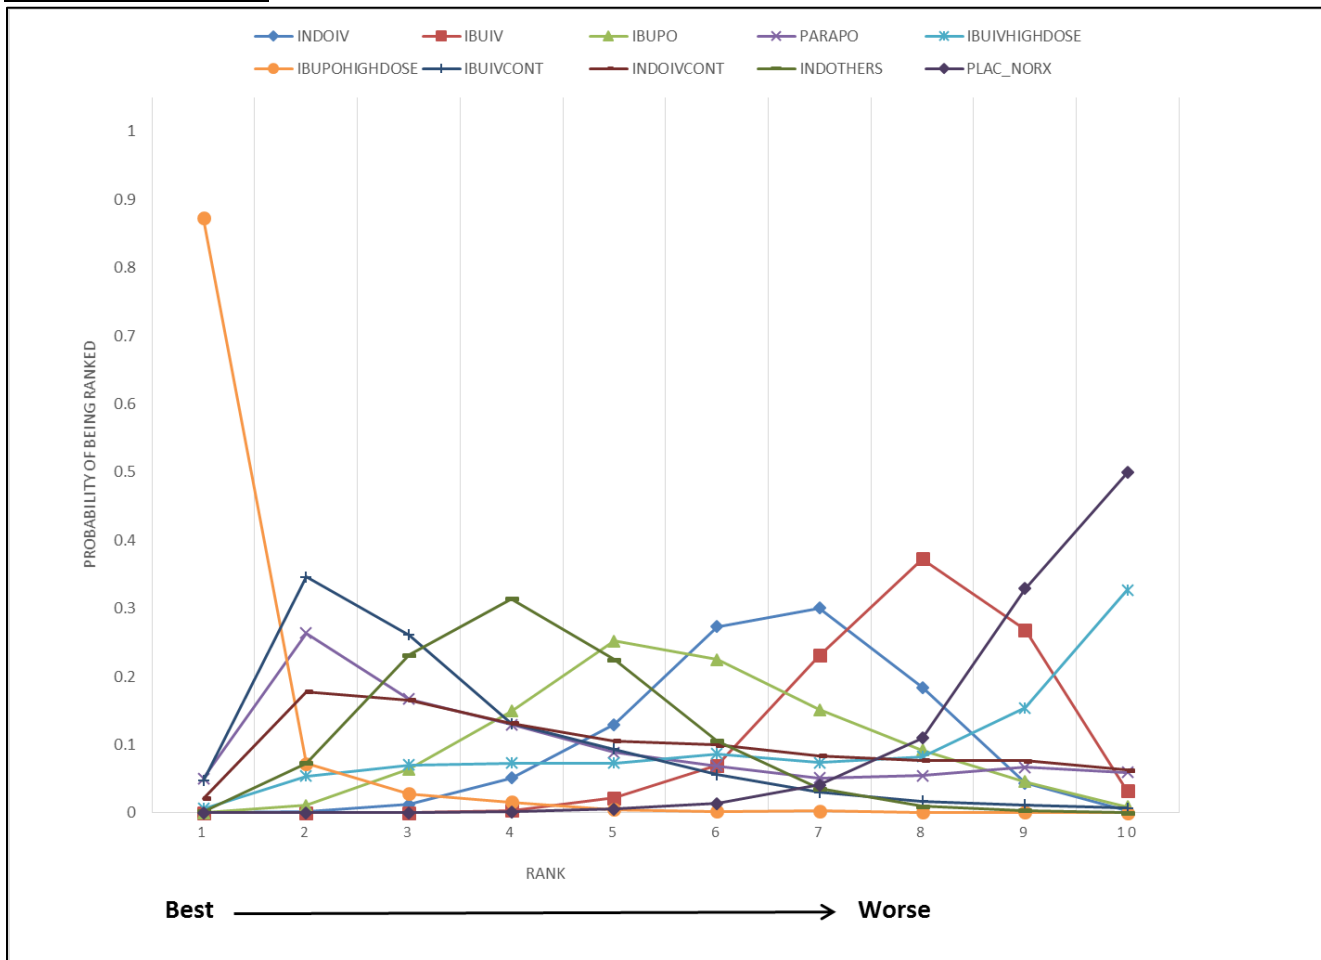

**eTable 26. Ranking statistics for need for surgical PDA ligation on sensitivity analysis ('low' & 'probably low' risk of bias studies)**

| Need for surgical PDA ligation |                                 |                                      |
|--------------------------------|---------------------------------|--------------------------------------|
| Treatment                      | SUCRA mean (Standard Deviation) | Median rank (95% Credible intervals) |
| INDOIV                         | 0.39 (0.14)                     | 7 (4-9)                              |
| IBUIV                          | 0.24 (0.12)                     | 8 (5-10)                             |
| IBUPO                          | 0.48 (0.18)                     | 6 (3-9)                              |
| PARAPO                         | 0.62 (0.29)                     | 4 (1-10)                             |
| IBUIVHIGHDOSE                  | 0.30 (0.30)                     | 8 (2-10)                             |
| IBUPOHIGHDOSE                  | 0.97 (0.09)                     | 1 (1-4)                              |
| IBUIVCONT                      | 0.74 (0.19)                     | 3 (1-8)                              |
| INDOIVCONT                     | 0.55 (0.29)                     | 5 (2-10)                             |
| INDOTHERS                      | 0.64 (0.14)                     | 4 (2-7)                              |
| PLAC_NORX                      | 0.08 (0.11)                     | 9 (7-10)                             |

**eTable 27. Network effect estimates for neonatal mortality on sensitivity analysis ('low' & 'probably low' risk of bias studies)**

|                        |                        |                        |                        |                        |                       |                        |                        |                       |                  |  |
|------------------------|------------------------|------------------------|------------------------|------------------------|-----------------------|------------------------|------------------------|-----------------------|------------------|--|
| <b>IBUPO</b>           |                        |                        |                        |                        |                       |                        |                        |                       |                  |  |
| 0.96<br>(0.41 – 2.07)  | <b>PARAPO</b>          |                        |                        |                        |                       |                        |                        |                       |                  |  |
| 0.85<br>(0.41 – 1.81)  | 0.90<br>(0.35 – 2.32)  | <b>IBUIV</b>           |                        |                        |                       |                        |                        |                       |                  |  |
| 0.83<br>(0.33 – 2.25)  | 0.85<br>(0.30 – 2.68)  | 0.97<br>(0.42 – 2.19)  | <b>INDOTHERS</b>       |                        |                       |                        |                        |                       |                  |  |
| 0.86<br>(0.01 – 27.31) | 0.87<br>(0.02 – 29.74) | 1.00<br>(0.02 – 30.42) | 1.02<br>(0.02 – 33.02) | <b>IBUIVCONT</b>       |                       |                        |                        |                       |                  |  |
| 0.78<br>(0.36 – 1.76)  | 0.82<br>(0.33 – 2.04)  | 0.91<br>(0.50 – 1.70)  | 0.94<br>(0.46 – 2.03)  | 0.92<br>(0.03 – 64.11) | <b>INDOIV</b>         |                        |                        |                       |                  |  |
| 0.66<br>(0.12 – 3.32)  | 0.69<br>(0.12 – 3.94)  | 0.77<br>(0.18 – 3.27)  | 0.81<br>(0.14 – 4.48)  | 0.80<br>(0.02 – 41.76) | 0.84<br>(0.17 – 4.06) | <b>IBUIVHIGHDOSE</b>   |                        |                       |                  |  |
| 0.42<br>(0.01 – 5.24)  | 0.45<br>(0.02 – 6.09)  | 0.51<br>(0.02 – 7.33)  | 0.49<br>(0.02 – 7.70)  | 0.40<br>(0.00 – 85.48) | 0.54<br>(0.02 – 7.83) | 0.62<br>(0.02 – 13.66) | <b>IBUPOHIGHDOSE</b>   |                       |                  |  |
| 0.36<br>(0.05 – 1.96)  | 0.39<br>(0.04 – 2.33)  | 0.42<br>(0.06 – 2.01)  | 0.43<br>(0.06 – 2.34)  | 0.46<br>(0.01 – 31.39) | 0.45<br>(0.07 – 2.25) | 0.57<br>(0.05 – 4.24)  | 0.79<br>(0.03 – 33.66) | <b>INDOIVCONT</b>     |                  |  |
| 0.50<br>(0.22 – 1.07)  | 0.51<br>(0.20 – 1.32)  | 0.58<br>(0.30 – 1.09)  | 0.59<br>(0.29 – 1.18)  | 0.56<br>(0.02 – 37.85) | 0.62<br>(0.36 – 1.07) | 0.73<br>(0.15 – 3.81)  | 1.14<br>(0.08 – 34.40) | 1.37<br>(0.26 – 9.96) | <b>PLAC_NORX</b> |  |

Network effect estimates (Odds ratio with 95% credible intervals) for each possible treatment comparison in the network for neonatal mortality computed using Bayesian random effects model with non-informative priors. For each outcome, the treatment on the top left corner indicates the best treatment option and the one on the bottom right indicates the worst treatment option based on mean SUCRA values



**eFigure 23. Rankogram for neonatal mortality on sensitivity analysis ('low' & 'probably low' risk of bias studies)**

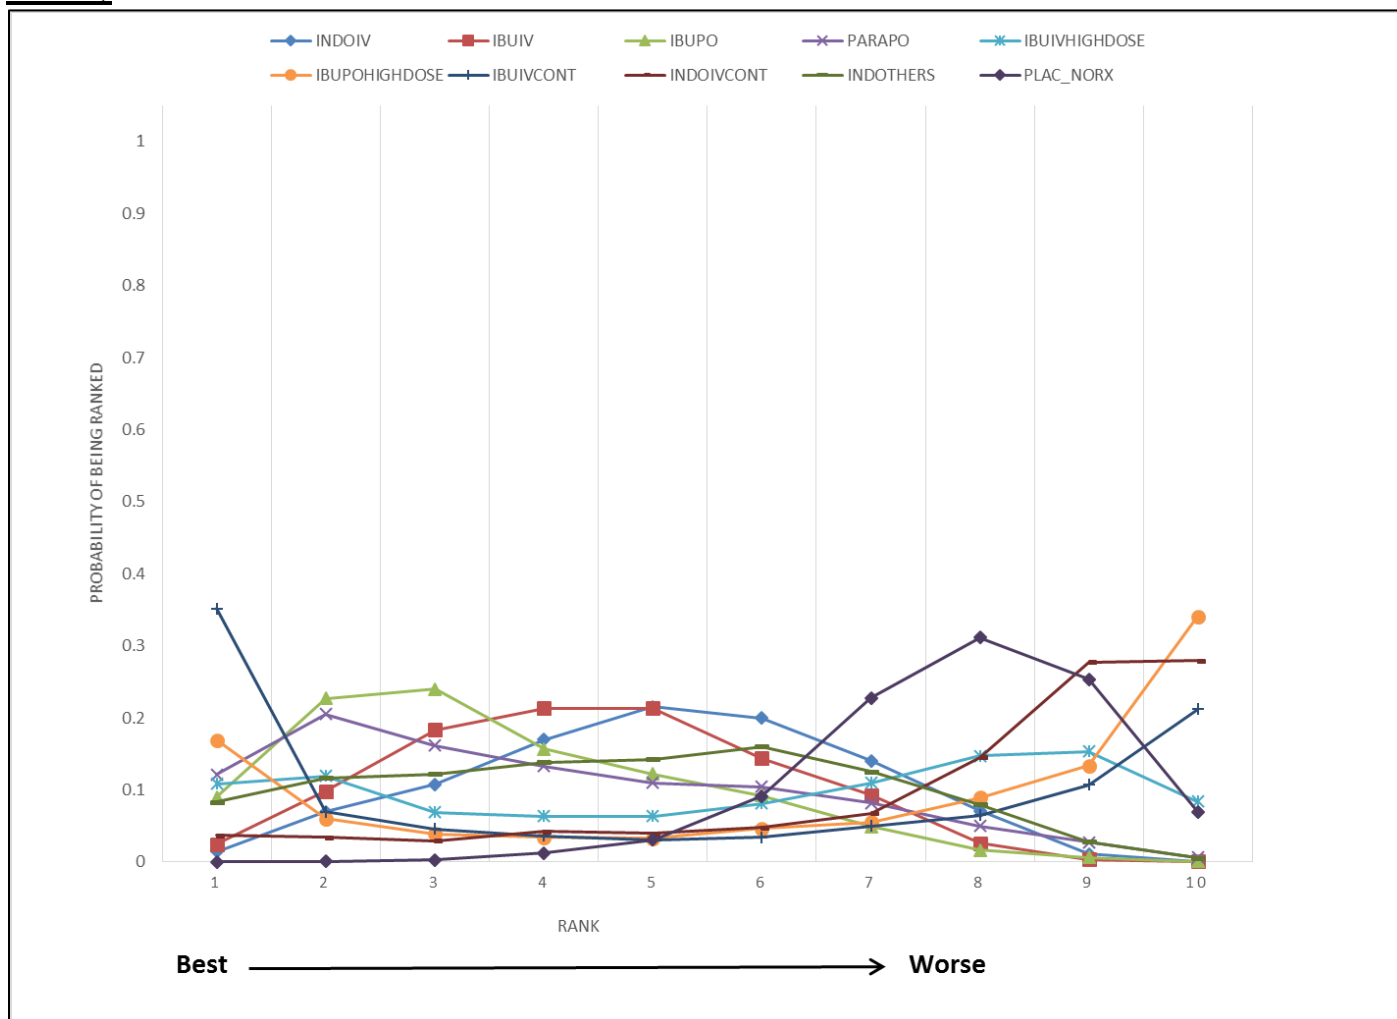

**eTable 28. Ranking statistics for neonatal mortality on sensitivity analysis ('low' & 'probably low' risk of bias studies)**

| Neonatal Mortality |                                 |                                       |
|--------------------|---------------------------------|---------------------------------------|
| Treatment          | SUCRA mean (Standard Deviation) | Median rank (95 % Credible intervals) |
| INDOIV             | 0.55 (0.19)                     | 5 (2-8)                               |
| IBUIV              | 0.62 (0.18)                     | 4 (2-8)                               |
| IBUPO              | 0.71 (0.20)                     | 3 (1-7)                               |
| PARAPO             | 0.67 (0.25)                     | 4 (1-9)                               |
| IBUIVHIGHDOSE      | 0.47 (0.33)                     | 6 (1-10)                              |
| IBUPOHIGHDOSE      | 0.37 (0.39)                     | 8 (1-10)                              |
| IBUIVCONT          | 0.55 (0.42)                     | 4 (1-10)                              |
| INDOIVCONT         | 0.25 (0.28)                     | 9 (1-10)                              |
| INDOTHERS          | 0.59 (0.25)                     | 5 (1-9)                               |
| PLAC_NORX          | 0.24 (0.14)                     | 8 (5-10)                              |

**eTable 29. Network effect estimates for risk of necrotizing enterocolitis on sensitivity analysis ('low' & 'probably low' risk of bias studies)**

|                     |                      |                      |                      |                     |                     |                     |                      |                     |           |  |
|---------------------|----------------------|----------------------|----------------------|---------------------|---------------------|---------------------|----------------------|---------------------|-----------|--|
| IBUPOHIGHDOSE       |                      |                      |                      |                     |                     |                     |                      |                     |           |  |
| 0.05<br>(0.00–2.60) | IBUIVCONT            |                      |                      |                     |                     |                     |                      |                     |           |  |
| 0.03<br>(0.00–0.87) | 0.57<br>(0.08–3.85)  | INDOTHERS            |                      |                     |                     |                     |                      |                     |           |  |
| 0.03<br>(0.00–2.95) | 0.71<br>(0.03–16.93) | 1.16<br>(0.10–18.05) | PARAPO               |                     |                     |                     |                      |                     |           |  |
| 0.02<br>(0.00–1.83) | 0.54<br>(0.03–7.74)  | 0.89<br>(0.09–11.48) | 0.72<br>(0.02–22.85) | INDOIVCONT          |                     |                     |                      |                     |           |  |
| 0.02<br>(0.00–0.47) | 0.38<br>(0.04–2.59)  | 0.65<br>(0.21–1.90)  | 0.56<br>(0.04–5.50)  | 0.75<br>(0.05–7.10) | IBUPO               |                     |                      |                     |           |  |
| 0.01<br>(0.00–0.44) | 0.29<br>(0.05–1.80)  | 0.50<br>(0.21–1.31)  | 0.42<br>(0.03–5.19)  | 0.56<br>(0.05–4.98) | 0.77<br>(0.26–2.51) | INDOIV              |                      |                     |           |  |
| 0.01<br>(0.00–0.61) | 0.20<br>(0.01–4.09)  | 0.35<br>(0.03–4.77)  | 0.31<br>(0.01–9.35)  | 0.40<br>(0.01–9.22) | 0.54<br>(0.04–7.59) | 0.70<br>(0.06–8.19) | IBUIVHIGHDOSE        |                     |           |  |
| 0.01<br>(0.00–0.33) | 0.22<br>(0.03–1.07)  | 0.37<br>(0.14–0.92)  | 0.30<br>(0.02–3.64)  | 0.42<br>(0.04–3.15) | 0.57<br>(0.19–1.66) | 0.75<br>(0.35–1.27) | 1.08<br>(0.09–10.90) | IBUIV               |           |  |
| 0.01<br>(0.00–0.24) | 0.13<br>(0.02–0.82)  | 0.22<br>(0.10–0.48)  | 0.18<br>(0.01–2.49)  | 0.24<br>(0.02–2.28) | 0.34<br>(0.10–1.10) | 0.43<br>(0.17–1.01) | 0.62<br>(0.05–7.72)  | 0.59<br>(0.24–1.52) | PLAC_NORX |  |

Network effect estimates (Odds ratio with 95% credible intervals) for each possible treatment comparison in the network for risk of necrotizing enterocolitis computed using Bayesian random effects model with non-informative priors. For each outcome, the treatment on the top left corner indicates the best treatment option and the one on the bottom right indicates the worst treatment option based on mean SUCRA values

**eFigure 24. Rankogram for risk of necrotizing enterocolitis on sensitivity analysis ('low' & 'probably low' risk of bias studies)**

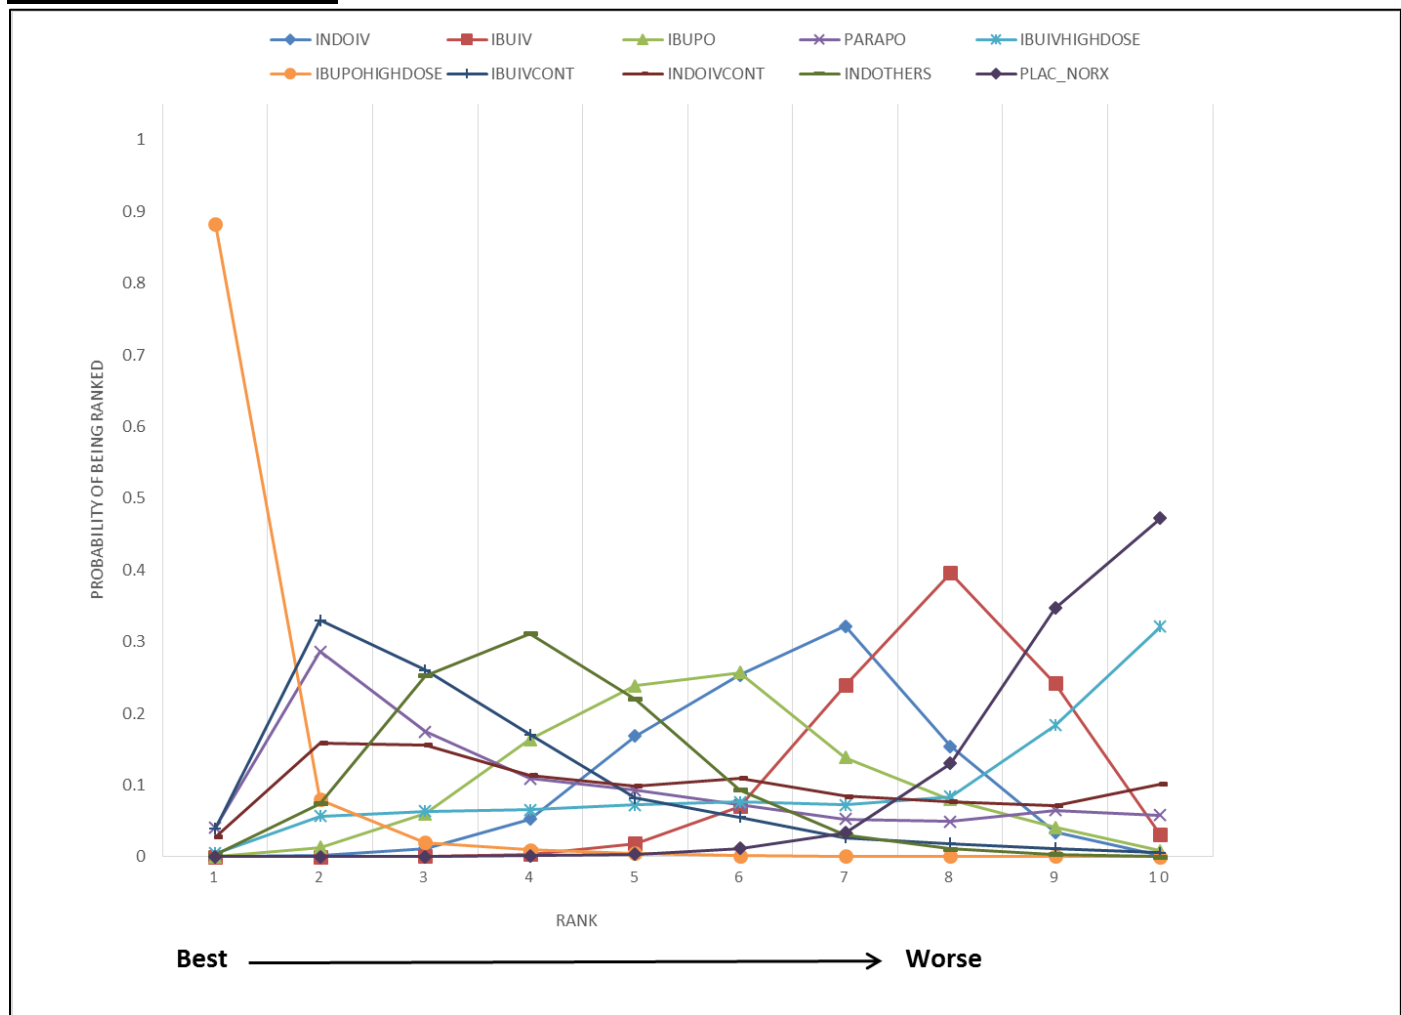

**eTable 30. Ranking statistics for risk of necrotizing enterocolitis on sensitivity analysis ('low' & 'probably low' risk of bias studies)**

| Risk of Necrotizing Enterocolitis |                                 |                                      |
|-----------------------------------|---------------------------------|--------------------------------------|
| Treatment                         | SUCRA mean (Standard Deviation) | Median rank (95% Credible intervals) |
| INDOIV                            | 0.39 (0.14)                     | 7 (4-9)                              |
| IBUIV                             | 0.24(0.12)                      | 8 (5-10)                             |
| IBUPO                             | 0.48 (0.18)                     | 6 (3-9)                              |
| PARAPO                            | 0.62 (0.29)                     | 4 (1-10)                             |
| IBUIVHIGHDOSE                     | 0.30 (0.30)                     | 8 (2-10)                             |
| IBUPOHIGHDOSE                     | 0.97 (0.09)                     | 1 (1-4)                              |
| IBUIVCONT                         | 0.74 (0.19)                     | 3 (1-8)                              |
| INDOIVCONT                        | 0.55 (0.29)                     | 5 (2-10)                             |
| INDOTHERS                         | 0.64 (0.14)                     | 4 (2-7)                              |
| PLAC_NORX                         | 0.08 (0.11)                     | 9 (7-10)                             |

**eTable 31. Network effect estimates for risk of bronchopulmonary dysplasia on sensitivity analysis ('low' & 'probably low' risk of bias studies)**

|                       |                       |                       |                       |                       |                       |                       |                      |
|-----------------------|-----------------------|-----------------------|-----------------------|-----------------------|-----------------------|-----------------------|----------------------|
| <b>IBUPO</b>          |                       |                       |                       |                       |                       |                       |                      |
| 0.98<br>(0.34 – 3.01) | <b>PARAPO</b>         |                       |                       |                       |                       |                       |                      |
| 0.60<br>(0.31 – 1.11) | 0.60<br>(0.20 – 1.75) | <b>INDOIV</b>         |                       |                       |                       |                       |                      |
| 0.59<br>(0.33 – 1.06) | 0.60<br>(0.20 – 1.81) | 1.00<br>(0.67 – 1.51) | <b>IBUIV</b>          |                       |                       |                       |                      |
| 0.51<br>(0.15 – 1.83) | 0.52<br>(0.11 – 2.54) | 0.86<br>(0.28 – 2.93) | 0.86<br>(0.30 – 2.66) | <b>IBUIVCONT</b>      |                       |                       |                      |
| 0.49<br>(0.25 – 0.91) | 0.50<br>(0.16 – 1.53) | 0.83<br>(0.50 – 1.36) | 0.83<br>(0.47 – 1.45) | 0.96<br>(0.26 – 3.17) | <b>PLAC_NORX</b>      |                       |                      |
| 0.37<br>(0.12 – 1.22) | 0.39<br>(0.09 – 1.68) | 0.64<br>(0.23 – 1.74) | 0.64<br>(0.22 – 1.83) | 0.72<br>(0.16 – 3.43) | 0.76<br>(0.26 – 2.33) | <b>INDOTHERS</b>      |                      |
| 0.27<br>(0.07 – 1.09) | 0.28<br>(0.05 – 1.49) | 0.46<br>(0.13 – 1.70) | 0.46<br>(0.14 – 1.58) | 0.53<br>(0.10 – 2.74) | 0.55<br>(0.16 – 2.16) | 0.74<br>(0.15 – 3.51) | <b>IBUIVHIGHDOSE</b> |

Network effect estimates (Odds ratio with 95% credible intervals) for each possible treatment comparison in the network for risk of bronchopulmonary dysplasia computed using Bayesian random effects model with non-informative priors. For each outcome, the treatment on the top left corner indicates the best treatment option and the one on the bottom right indicates the worst treatment option based on mean SUCRA values

**eFigure 25. Rankogram for risk of bronchopulmonary dysplasia on sensitivity analysis ('low' & 'probably low' risk of bias studies)**

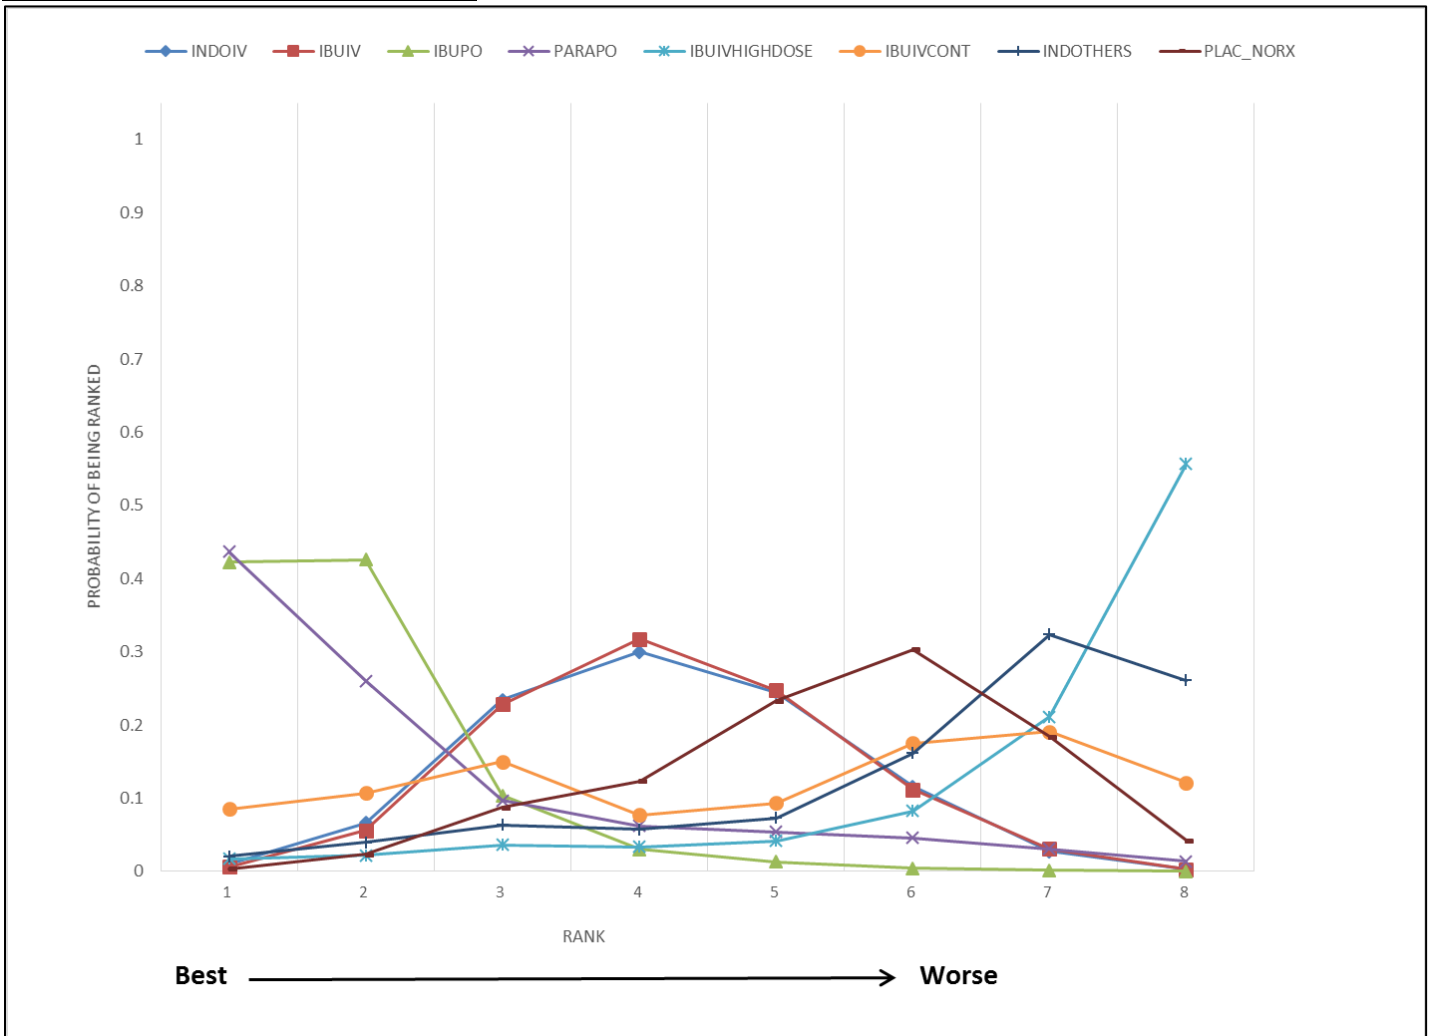

**eTable 32. Ranking statistics for risk of bronchopulmonary dysplasia on sensitivity analysis ('low' & 'probably low' risk of bias studies)**

| Risk of Bronchopulmonary Dysplasia |                                 |                                      |
|------------------------------------|---------------------------------|--------------------------------------|
| Treatment                          | SUCRA mean (Standard Deviation) | Median rank (95% Credible intervals) |
| INDOIV                             | 0.55 (0.18)                     | 4 (2-7)                              |
| IBUIV                              | 0.54 (0.17)                     | 4 (2-7)                              |
| IBUPO                              | 0.89 (0.13)                     | 2 (1-4)                              |
| PARAPO                             | 0.81 (0.25)                     | 2 (1-7)                              |
| IBUIVHIGHDOSE                      | 0.15 (0.24)                     | 8 (2-8)                              |
| IBUIVCONT                          | 0.45 (0.32)                     | 5 (1-8)                              |
| INDOTHERS                          | 0.26 (0.26)                     | 7 (2-8)                              |
| PLAC_NORX                          | 0.37 (0.20)                     | 6 (2-8)                              |

**eTable 33. Network effect estimates for risk of intraventricular hemorrhage on sensitivity analysis ('low' & 'probably low' risk of bias studies)**

|                       |                       |                       |                       |                       |                       |                     |                     |               |  |
|-----------------------|-----------------------|-----------------------|-----------------------|-----------------------|-----------------------|---------------------|---------------------|---------------|--|
| <b>IBUIVHIGHDOSE</b>  |                       |                       |                       |                       |                       |                     |                     |               |  |
| 0.90<br>(0.10–7.36)   | <b>IBUIVCONT</b>      |                       |                       |                       |                       |                     |                     |               |  |
| 0.81<br>(0.09–7.05)   | 0.89<br>(0.12–6.74)   | <b>IBUPOHIGHDOSE</b>  |                       |                       |                       |                     |                     |               |  |
| 0.60<br>(0.11–3.27)   | 0.67<br>(0.14–3.07)   | 0.74<br>(0.20–2.69)   | <b>IBUPO</b>          |                       |                       |                     |                     |               |  |
| 0.60<br>(0.12–2.89)   | 0.68<br>(0.16–2.71)   | 0.74<br>(0.18–3.06)   | 1.00<br>(0.55–1.87)   | <b>IBUIV</b>          |                       |                     |                     |               |  |
| 0.50<br>(0.00–209.16) | 0.57<br>(0.00–178.25) | 0.65<br>(0.00–168.55) | 0.85<br>(0.00–239.52) | 0.86<br>(0.00–226.35) | <b>INDOIVCONT</b>     |                     |                     |               |  |
| 0.55<br>(0.08–3.80)   | 0.63<br>(0.11–3.67)   | 0.69<br>(0.14–3.41)   | 0.93<br>(0.36–2.40)   | 0.93<br>(0.32–2.63)   | 1.09<br>(0.00–941.60) | <b>PARAPO</b>       |                     |               |  |
| 0.54<br>(0.09–2.96)   | 0.60<br>(0.13–2.89)   | 0.67<br>(0.16–2.73)   | 0.90<br>(0.49–1.66)   | 0.90<br>(0.46–1.72)   | 1.05<br>(0.00–949.67) | 0.97<br>(0.34–2.81) | <b>PLAC_NORX</b>    |               |  |
| 0.52<br>(0.09–3.06)   | 0.58<br>(0.11–2.94)   | 0.65<br>(0.14–2.92)   | 0.87<br>(0.39–1.99)   | 0.87<br>(0.39–1.96)   | 1.03<br>(0.00–850.70) | 0.93<br>(0.35–2.57) | 0.96<br>(0.43–2.21) | <b>INDOIV</b> |  |

Network effect estimates (Odds ratio with 95% credible intervals) for each possible treatment comparison in the network for risk of intraventricular hemorrhage computed using Bayesian random effects model with non-informative priors. For each outcome, the treatment on the top left corner indicates the best treatment option and the one on the bottom right indicates the worst treatment option based on mean SUCRA values

**eFigure 26. Rankogram for risk of intraventricular hemorrhage on sensitivity analysis ('low' & 'probably low' risk of bias studies)**

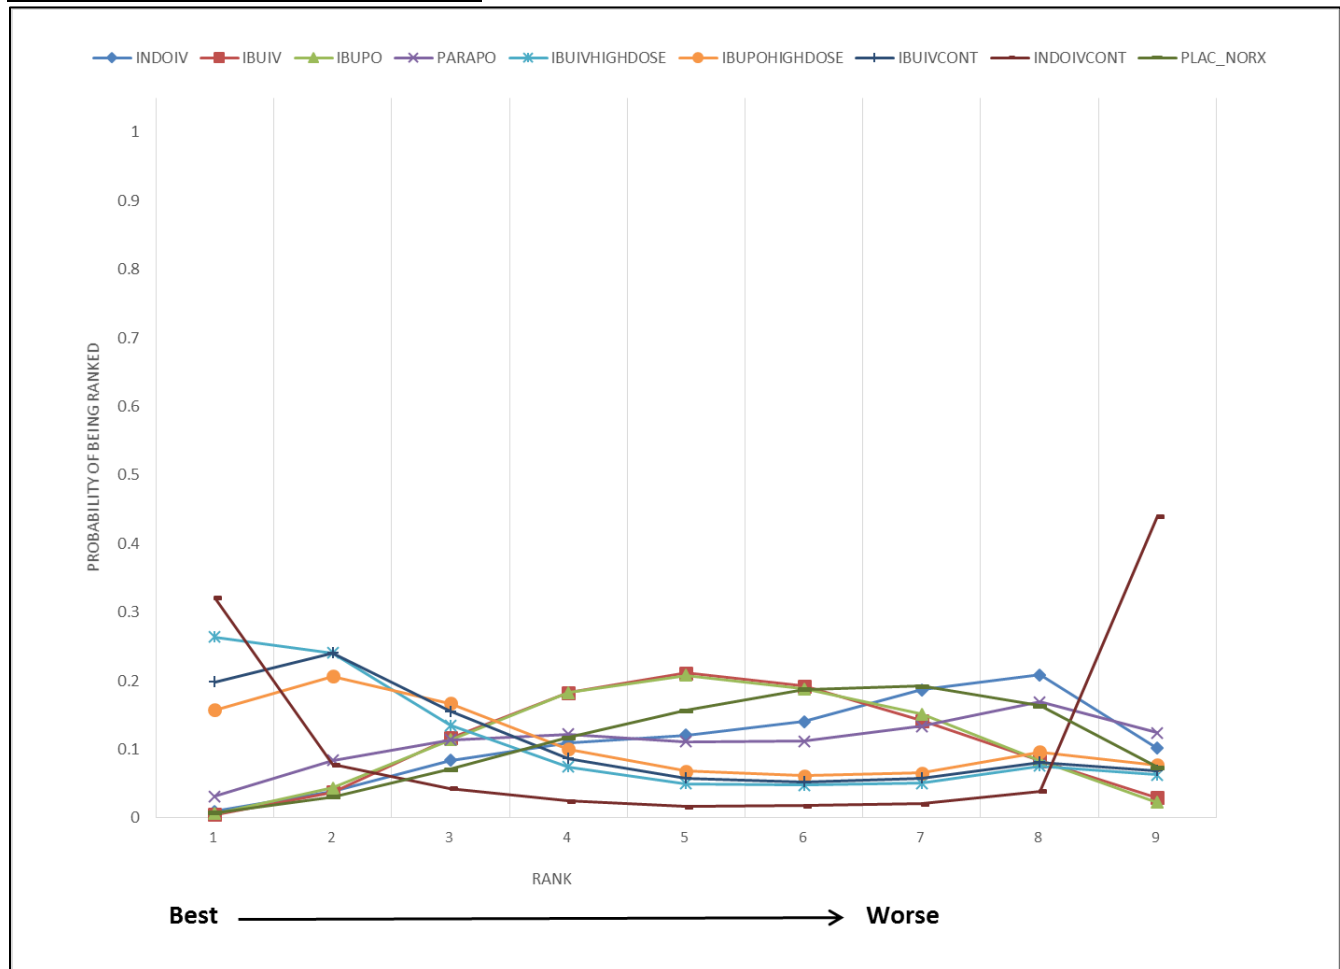

**eTable 34. Ranking statistics for risk of intraventricular hemorrhage on sensitivity analysis ('low' & 'probably low' risk of bias studies)**

| Risk of Intraventricular Hemorrhage |                                 |                                      |
|-------------------------------------|---------------------------------|--------------------------------------|
| Treatment                           | SUCRA mean (Standard Deviation) | Median rank (95% Credible intervals) |
| INDOIV                              | 0.36 (0.25)                     | 6 (2-9)                              |
| IBUIV                               | 0.46 (0.21)                     | 5 (2-9)                              |
| IBUPO                               | 0.47 (0.22)                     | 5 (2-8)                              |
| PARAPO                              | 0.42 (0.29)                     | 6 (1-9)                              |
| IBUIVHIGHDOSE                       | 0.69 (0.32)                     | 2 (1-9)                              |
| IBUPOHIGHDOSE                       | 0.61(0.33)                      | 3 (1-9)                              |
| IBUIVCONT                           | 0.65 (0.32)                     | 3 (1-9)                              |
| INDOIVCONT                          | 0.46 (0.46)                     | 6 (1-9)                              |
| PLAC_NORX                           | 0.38 (0.23)                     | 6 (2-9)                              |

**eTable 35. Network effect estimates for risk of oliguria on sensitivity analysis ('low' & 'probably low' risk of bias studies)**

|                       |                       |                       |                        |                       |                     |                      |                     |                      |  |
|-----------------------|-----------------------|-----------------------|------------------------|-----------------------|---------------------|----------------------|---------------------|----------------------|--|
| <b>IBUIVCONT</b>      |                       |                       |                        |                       |                     |                      |                     |                      |  |
| 0.13<br>(0.00–9.06)   | <b>PARAPO</b>         |                       |                        |                       |                     |                      |                     |                      |  |
| 0.12<br>(0.00–6.47)   | 0.87<br>(0.31–2.35)   | <b>IBUPO</b>          |                        |                       |                     |                      |                     |                      |  |
| 0.11<br>(0.00–3.68)   | 0.74<br>(0.07–6.78)   | 0.81<br>(0.09–6.93)   | <b>INDOTHERS</b>       |                       |                     |                      |                     |                      |  |
| 0.04<br>(0.00–231.80) | 0.51<br>(0.00–342.58) | 0.56<br>(0.00–471.92) | 0.66<br>(0.00–1621.00) | <b>INDOIVCONT</b>     |                     |                      |                     |                      |  |
| 0.06<br>(0.00–1.88)   | 0.43<br>(0.04–2.85)   | 0.48<br>(0.06–2.59)   | 0.57<br>(0.21–1.57)    | 0.87<br>(0.00–584.40) | <b>IBUIV</b>        |                      |                     |                      |  |
| 0.03<br>(0.00–2.54)   | 0.22<br>(0.01–4.44)   | 0.25<br>(0.01–4.43)   | 0.32<br>(0.02–3.59)    | 0.51<br>(0.00–307.80) | 0.56<br>(0.05–4.75) | <b>IBUIVHIGHDOSE</b> |                     |                      |  |
| 0.02<br>(0.00–0.61)   | 0.14<br>(0.01–0.96)   | 0.15<br>(0.02–0.93)   | 0.19<br>(0.08–0.41)    | 0.28<br>(0.00–197.70) | 0.33<br>(0.19–0.55) | 0.58<br>(0.06–7.20)  | <b>INDOIV</b>       |                      |  |
| 0.00<br>(0.00–0.04)   | 0.00<br>(0.00–0.09)   | 0.00<br>(0.00–0.10)   | 0.00<br>(0.00–0.12)    | 0.00<br>(0.00–0.12)   | 0.00<br>(0.00–0.17) | 0.00<br>(0.00–0.26)  | 0.00<br>(0.00–0.57) | <b>IBUPOHIGHDOSE</b> |  |

Network effect estimates (Odds ratio with 95% credible intervals) for each possible treatment comparison in the network for risk of oliguria computed using Bayesian random effects model with non-informative priors. For each outcome, the treatment on the top left corner indicates the best treatment option and the one on the bottom right indicates the worst treatment option based on mean SUCRA values

**eFigure 27. Rankogram for risk of oliguria on sensitivity analysis ('low' & 'probably low' risk of bias studies)**

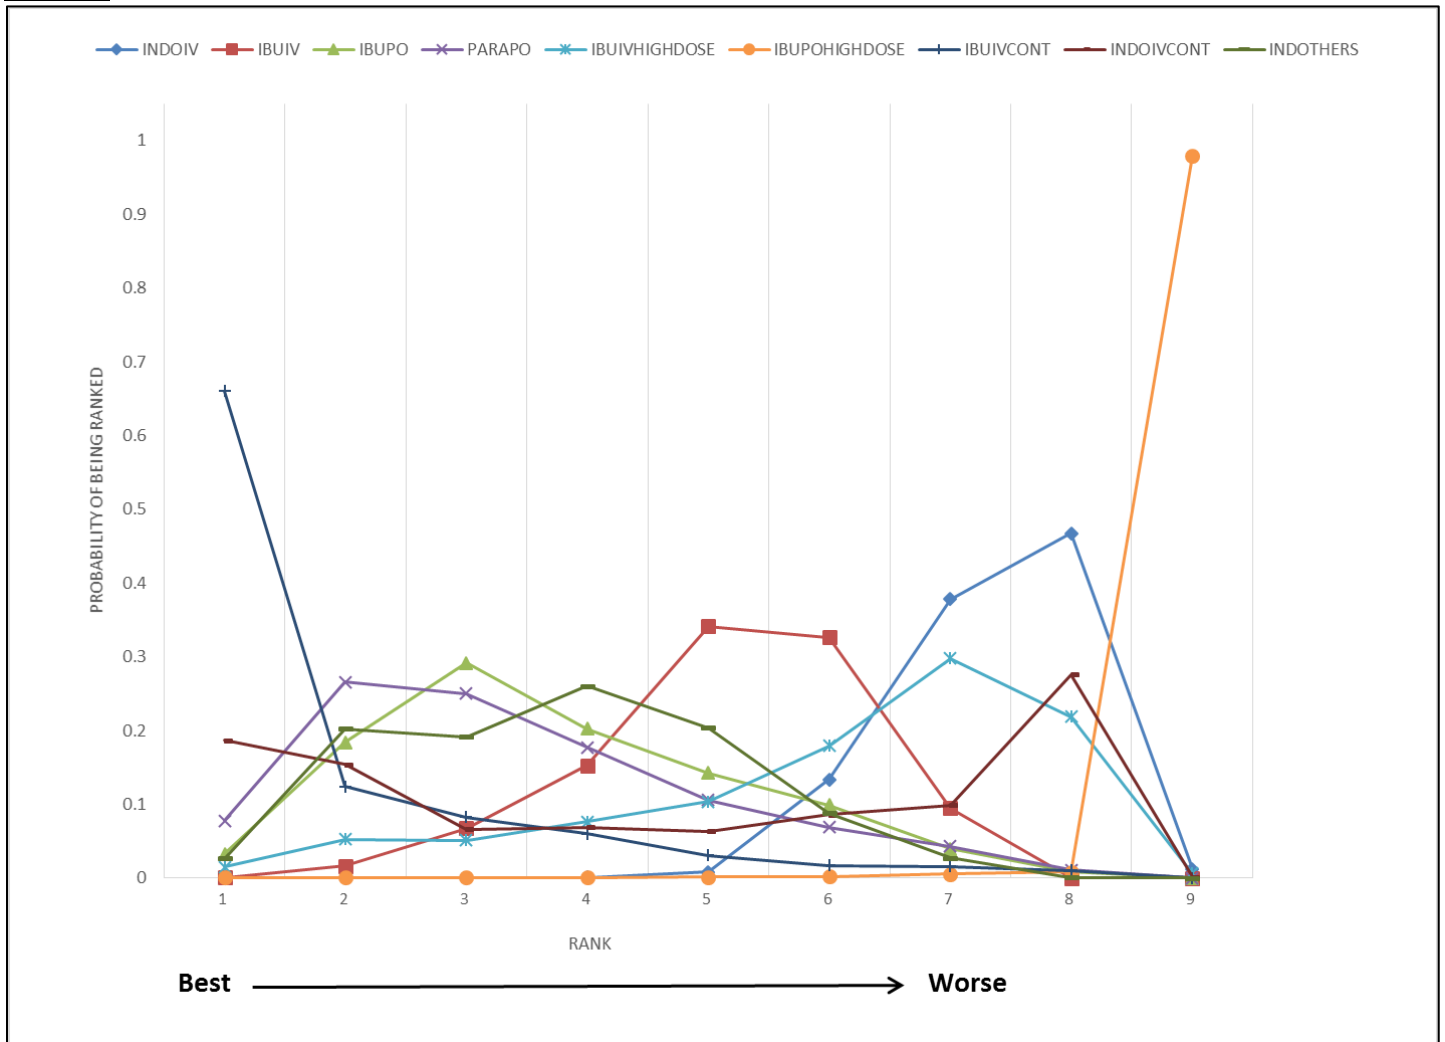

**eTable 36. Ranking statistics for risk of oliguria on sensitivity analysis ('low' & 'probably low' risk of bias studies)**

| Treatment     | Risk of Oliguria                |                                      |
|---------------|---------------------------------|--------------------------------------|
|               | SUCRA mean (Standard Deviation) | Median rank (95% Credible intervals) |
| INDOIV        | 0.21 (0.09)                     | 7 (6-8)                              |
| IBUIV         | 0.48 (0.14)                     | 5 (3-7)                              |
| IBUPO         | 0.66 (0.19)                     | 3 (1-7)                              |
| PARAPO        | 0.70 (0.20)                     | 3 (1-7)                              |
| IBUIVHIGHDOSE | 0.37(0.23)                      | 7 (2-8)                              |
| IBUPOHIGHDOSE | 0.006 (0.054)                   | 9 (9-9)                              |
| IBUIVCONT     | 0.89 (0.19)                     | 1 (1-7)                              |
| INDOIVCONT    | 0.54 (0.34)                     | 5 (1-8)                              |
| INDOTHERS     | 0.65 (0.18)                     | 4 (1-7)                              |

### **eText 3. Guide to interpreting meta-regression results**

With a meta-regression model, the pooled relative treatment effect for a certain comparison can be estimated on the basis of available studies, adjusted for differences in the level of the effect modifier between studies. This allows readers to identify the potential effect of some key variables in the results. Usually the approach with meta-regression is, after running the network meta-analysis and obtaining the effect estimates and rankings, a new model is generated adjusting for additional variables that could be effect modifiers (17).

In the following hypothetical example, an NMA of four interventions A, B, C and D, for the treatment of diarrhea in children, was conducted. The outcome of interest was the proportion of children who had diarrhea at day 3 of treatment. Odds ratios (OR) were interpreted as follows: for OR below 1.0, the first displayed intervention was protective (less children with diarrhea at day 3); for OR above 1.0, the opposite. A meta-regression analysis was run adjusting for age and days with diarrhea before recruitment as they were thought to play a role as effect modifiers. The results of this analysis have been displayed in the example tables below (etext3: Example tables A & B). It was found that on adjustment by days with diarrhea before recruitment, estimates for comparisons with treatment D changed substantially, and its SUCRA values changed as well. This suggested that the days with diarrhea had an impact on the effect of treatment D on the presence of diarrhea at day 3. In other words, the more days with diarrhea the child had, the less was the effect of D.

**eText3: Example Table A: Hypothetical example of network meta-regression results**

| Treatment comparison | Meta-regression for Age | Meta-regression for Days of diarrhea before recruitment |
|----------------------|-------------------------|---------------------------------------------------------|
| A vs B               | 0.48 (0.18-0.9)         | 0.48 (0.18-0.82)                                        |
| B vs C               | 0.6 (0.4-0.9)           | 0.6 (0.4-0.9)                                           |
| A vs C               | 0.32 (0.21-0.81)        | 0.32 (0.21-0.81)                                        |
| A vs D               | 1.05 (0.9-1.4)          | <b>0.58 (0.39-0.89)</b>                                 |
| D vs B               | 0.7 (0.40-0.86)         | <b>1.0 (0.88-1.46)</b>                                  |
| D vs C               | 0.24 (0.2 -0.60)        | 0.55 (0.35-0.85)                                        |

**eText3: Example Table B: Hypothetic example of corresponding mean SUCRA values (with SD) in the meta-regression Analysis**

| Treatment | Meta-regression for Age | Meta-regression for Days of diarrhea before recruitment |
|-----------|-------------------------|---------------------------------------------------------|
| A         | 0.96 (0.12)             | 0.96 (0.12)                                             |
| D         | <b>0.95 (0.08)</b>      | <b>0.28 (0.03)</b>                                      |
| B         | 0.23 (0.04)             | 0.33 (0.06)                                             |
| C         | 0.08 (0.01)             | 0.09 (0.01)                                             |



eTable 37. Meta-regression Analysis Results for Outcome: PDA Closure

| Meta-regression NMA Results For Mean Gestational Age |                                      | Meta-regression NMA Results For Mean Birth Weight |                                      | Meta-regression NMA Results For Year of Publication |                                      | Meta-regression NMA Results For Age of Initiation of Treatment |                                      |
|------------------------------------------------------|--------------------------------------|---------------------------------------------------|--------------------------------------|-----------------------------------------------------|--------------------------------------|----------------------------------------------------------------|--------------------------------------|
| Treatment Comparison                                 | Network Meta-regression OR (95% CrI) | Treatment Comparison                              | Network Meta-regression OR (95% CrI) | Treatment Comparison                                | Network Meta-regression OR (95% CrI) | Treatment Comparison                                           | Network Meta-regression OR (95% CrI) |
| PARAPO versus                                        |                                      | PARAPO versus                                     |                                      | PARAPO versus                                       |                                      | PARAPO versus                                                  |                                      |
| INDOTHERS                                            | 1.99 (0.80-4.86)                     | INDOTHERS                                         | 2.24 (0.93-5.50)                     | INDOTHERS                                           | 1.42 (0.62-3.27)                     | INDOTHERS                                                      | 0.95 (0.34-2.73)                     |
| INDOIVCONT                                           | 2.31 (0.60-9.17)                     | INDOIVCONT                                        | 2.48 (0.66-9.51)                     | INDOIVCONT                                          | 1.43 (0.38-5.47)                     | INDOIVCONT                                                     | 0.65 (0.11-3.55)                     |
| INDOIV                                               | 1.79 (0.77-4.15)                     | INDOIV                                            | 1.97 (0.85-4.55)                     | INDOIV                                              | 1.25 (0.54-2.86)                     | INDOIV                                                         | 0.93 (0.30-2.82)                     |
| IBUPOHIGHDOSE                                        | 0.47 (0.12-1.78)                     | IBUPOHIGHDOSE                                     | 0.53 (0.15-1.93)                     | IBUPOHIGHDOSE                                       | 0.24 (0.06-0.88)                     | IBUPO                                                          | 1.11 (0.50-2.47)                     |
| IBUPO                                                | 1.32 (0.66-2.65)                     | IBUPO                                             | 1.47 (0.75-2.94)                     | IBUPO                                               | 0.93 (0.48-1.81)                     | IBUIVCONT                                                      | 2.21 (0.48-9.97)                     |
| IBUIVHIGHDOSE                                        | 0.91 (0.13-5.84)                     | IBUIVHIGHDOSE                                     | 1.13 (0.18-7.19)                     | IBUIVHIGHDOSE                                       | 0.64 (0.12-3.32)                     | IBUIV                                                          | 1.38 (0.43-4.30)                     |
| IBUIVCONT                                            | 4.40 (0.91-21.77)                    | IBUIVCONT                                         | 5.26 (1.16-24.64)                    | IBUIVCONT                                           | 3.53 (0.91-13.95)                    | PLAC/NORX                                                      | 5.89 (2.03-17.91)                    |
| IBUIV                                                | 3.01 (1.26-7.32)                     | IBUIV                                             | 3.38 (1.44-8.25)                     | IBUIV                                               | 1.94 (0.85-4.56)                     | INDOTHERS versus                                               |                                      |
| PLAC/NORX                                            | 15.92 (6.50-41.74)                   | PLAC/NORX                                         | 18.58 (7.40-48.49)                   | PLAC/NORX                                           | 8.86 (3.60-22.98)                    | INDOIVCONT                                                     | 0.68 (0.15-2.75)                     |
| INDOTHERS versus                                     |                                      | INDOTHERS versus                                  |                                      | INDOTHERS versus                                    |                                      | INDOIV versus                                                  |                                      |
| INDOIVCONT                                           | 1.16 (0.36-3.88)                     | INDOIVCONT                                        | 1.10 (0.36-3.53)                     | INDOIVCONT                                          | 1.01 (0.33-3.14)                     | IBUPO                                                          | 1.16 (0.60-2.30)                     |
| INDOIV                                               | 0.90 (0.59-1.37)                     | INDOIV                                            | 0.87 (0.58-1.31)                     | INDOIV                                              | 0.88 (0.59-1.29)                     | IBUIVCONT                                                      | 2.32 (0.69-7.66)                     |
| IBUPOHIGHDOSE                                        | 0.24 (0.07-0.80)                     | IBUPOHIGHDOSE                                     | 0.24 (0.07-0.78)                     | IBUPOHIGHDOSE                                       | 0.17 (0.05-0.54)                     | IBUIV                                                          | 1.46 (0.77-2.69)                     |
| IBUPO                                                | 0.67 (0.38-1.18)                     | IBUPO                                             | 0.66 (0.37-1.14)                     | IBUPO                                               | 0.65 (0.38-1.12)                     | PLAC/NORX                                                      | 6.10 (3.39-11.95)                    |
| IBUIVHIGHDOSE                                        | 0.46 (0.08-2.41)                     | IBUIVHIGHDOSE                                     | 0.51 (0.10-2.56)                     | IBUIVHIGHDOSE                                       | 0.45 (0.09-2.11)                     | INDOIVCONT versus                                              |                                      |
| IBUIVCONT                                            | 2.24 (0.57-8.87)                     | IBUIVCONT                                         | 2.34 (0.64-8.69)                     | IBUIVCONT                                           | 2.47 (0.72-8.95)                     | INDOIV                                                         | 1.42 (0.38-5.76)                     |
| IBUIV                                                | 1.52 (0.90-2.62)                     | IBUIV                                             | 1.51 (0.91-2.57)                     | IBUIV                                               | 1.37 (0.83-2.32)                     | IBUPO                                                          | 1.71 (0.38-8.35)                     |
| PLAC/NORX                                            | 8.05 (4.48-15.14)                    | PLAC/NORX                                         | 8.24 (4.70-15.27)                    | PLAC/NORX                                           | 6.25 (3.61-11.34)                    | IBUIVCONT                                                      | 3.39 (0.67-18.43)                    |
| INDOIVCONT versus                                    |                                      | INDOIVCONT versus                                 |                                      | INDOIVCONT versus                                   |                                      | IBUIV versus                                                   |                                      |
| INDOIV                                               | 0.78 (0.25-2.30)                     | INDOIV                                            | 0.79 (0.27-2.28)                     | INDOIV                                              | 0.87 (0.30-2.46)                     | PLAC/NORX                                                      | 9.05 (2.18-42.52)                    |
| IBUPOHIGHDOSE                                        | 0.20 (0.04-1.04)                     | IBUPOHIGHDOSE                                     | 0.22 (0.04-1.02)                     | IBUPOHIGHDOSE                                       | 0.17 (0.04-0.74)                     | INDOIV versus                                                  |                                      |
| IBUPO                                                | 0.58 (0.17-1.89)                     | IBUPO                                             | 0.59 (0.18-1.89)                     | IBUPO                                               | 0.65 (0.21-1.99)                     | IBUPO                                                          | 1.20 (0.57-2.59)                     |
| IBUIVHIGHDOSE                                        | 0.39 (0.05-2.86)                     | IBUIVHIGHDOSE                                     | 0.46 (0.06-2.97)                     | IBUIVHIGHDOSE                                       | 0.44 (0.07-2.72)                     | IBUIVCONT                                                      | 2.39 (0.78-7.49)                     |
| IBUIVCONT                                            | 1.92 (0.34-10.43)                    | IBUIVCONT                                         | 2.12 (0.40-10.52)                    | IBUIVCONT                                           | 2.44 (0.49-12.00)                    | IBUIV                                                          | 1.50 (0.97-2.38)                     |
| IBUIV                                                | 1.31 (0.43-3.95)                     | IBUIV                                             | 1.37 (0.47-3.91)                     | IBUIV                                               | 1.35 (0.48-3.83)                     | PLAC/NORX                                                      | 6.34 (3.32-12.90)                    |
| PLAC/NORX                                            | 6.95 (1.95-24.51)                    | PLAC/NORX                                         | 7.46 (2.29-24.73)                    | PLAC/NORX                                           | 6.17 (2.02-19.16)                    | IBUPO versus                                                   |                                      |
| INDOIV versus                                        |                                      | INDOIV versus                                     |                                      | INDOIV versus                                       |                                      | IBUIVCONT versus                                               |                                      |
| IBUPOHIGHDOSE                                        | 0.26 (0.08-0.90)                     | IBUPOHIGHDOSE                                     | 0.27 (0.08-0.87)                     | IBUPOHIGHDOSE                                       | 0.19 (0.06-0.59)                     | IBUIV                                                          | 1.25 (0.55-2.79)                     |
| IBUPO                                                | 0.74 (0.43-1.28)                     | IBUPO                                             | 0.75 (0.44-1.28)                     | IBUPO                                               | 0.74 (0.46-1.22)                     | PLAC/NORX                                                      | 5.24 (2.60-11.22)                    |
| IBUIVHIGHDOSE                                        | 0.51 (0.09-2.65)                     | IBUIVHIGHDOSE                                     | 0.58 (0.11-2.88)                     | IBUIVHIGHDOSE                                       | 0.51 (0.11-2.30)                     | IBUIVCONT versus                                               |                                      |
| IBUIVCONT                                            | 2.47 (0.64-9.66)                     | IBUIVCONT                                         | 2.67 (0.76-9.53)                     | IBUIVCONT                                           | 2.80 (0.84-9.98)                     | IBUIV                                                          | 0.62 (0.23-1.74)                     |
| IBUIV                                                | 1.69 (1.12-2.59)                     | IBUIV                                             | 1.72 (1.17-2.61)                     | IBUIV                                               | 1.56 (1.08-2.30)                     | PLAC/NORX                                                      | 2.66 (0.77-9.62)                     |
| PLAC/NORX                                            | 8.91 (4.82-17.22)                    | PLAC/NORX                                         | 9.41 (5.36-17.51)                    | PLAC/NORX                                           | 7.08 (4.35-12.34)                    | IBUIV versus                                                   |                                      |
| IBUPOHIGHDOSE versus                                 |                                      | IBUPOHIGHDOSE versus                              |                                      | IBUPOHIGHDOSE versus                                |                                      | PLAC/NORX                                                      | 4.24 (2.16-8.83)                     |
| IBUPO                                                | 2.84 (0.95-8.52)                     | IBUPO                                             | 2.75 (0.97-7.93)                     | IBUPO                                               | 3.91 (1.40-10.87)                    |                                                                |                                      |
| IBUIVHIGHDOSE                                        | 1.93 (0.26-14.06)                    | IBUIVHIGHDOSE                                     | 2.13 (0.30-14.60)                    | IBUIVHIGHDOSE                                       | 2.70 (0.40-17.60)                    |                                                                |                                      |
| IBUIVCONT                                            | 9.52 (1.66-55.73)                    | IBUIVCONT                                         | 9.76 (1.85-52.78)                    | IBUIVCONT                                           | 14.73 (2.90-77.76)                   |                                                                |                                      |
| IBUIV                                                | 6.46 (1.90-22.01)                    | IBUIV                                             | 6.31 (1.98-20.49)                    | IBUIV                                               | 8.21 (2.69-25.46)                    |                                                                |                                      |
| PLAC/NORX                                            | 34.15 (10.00-121.90)                 | PLAC/NORX                                         | 34.60 (10.74-117.80)                 | PLAC/NORX                                           | 37.47 (12.32-119.00)                 |                                                                |                                      |
| IBUPO versus                                         |                                      | IBUPO versus                                      |                                      | IBUPO versus                                        |                                      |                                                                |                                      |
| IBUIVHIGHDOSE                                        | 0.68 (0.12-3.71)                     | IBUIVHIGHDOSE                                     | 0.77 (0.14-3.96)                     | IBUIVHIGHDOSE                                       | 0.69 (0.14-3.17)                     |                                                                |                                      |
| IBUIVCONT                                            | 3.37 (0.83-13.66)                    | IBUIVCONT                                         | 3.56 (0.95-13.75)                    | IBUIVCONT                                           | 3.79 (1.09-13.44)                    |                                                                |                                      |
| IBUIV                                                | 2.28 (1.31-4.01)                     | IBUIV                                             | 2.30 (1.35-4.03)                     | IBUIV                                               | 2.10 (1.29-3.46)                     |                                                                |                                      |
| PLAC/NORX                                            | 12.03 (6.64-23.25)                   | PLAC/NORX                                         | 12.56 (7.00-23.66)                   | PLAC/NORX                                           | 9.56 (5.52-17.29)                    |                                                                |                                      |
| IBUIVHIGHDOSE versus                                 |                                      | IBUIVHIGHDOSE versus                              |                                      | IBUIVHIGHDOSE versus                                |                                      |                                                                |                                      |
| IBUIVCONT                                            | 4.87 (0.68-37.63)                    | IBUIVCONT                                         | 4.66 (0.67-33.94)                    | IBUIVCONT                                           | 5.55 (0.87-37.28)                    |                                                                |                                      |
| IBUIV                                                | 3.32 (0.68-17.00)                    | IBUIV                                             | 2.98 (0.65-14.78)                    | IBUIV                                               | 3.04 (0.71-13.99)                    |                                                                |                                      |
| PLAC/NORX                                            | 17.68 (3.29-103.90)                  | PLAC/NORX                                         | 16.15 (3.19-91.47)                   | PLAC/NORX                                           | 13.86 (2.93-71.25)                   |                                                                |                                      |
| IBUIVCONT versus                                     |                                      | IBUIVCONT versus                                  |                                      | IBUIVCONT versus                                    |                                      |                                                                |                                      |
| IBUIV                                                | 0.68 (0.19-2.42)                     | IBUIV                                             | 0.64 (0.20-2.12)                     | IBUIV                                               | 0.55 (0.17-1.77)                     |                                                                |                                      |
| PLAC/NORX                                            | 3.60 (0.88-15.19)                    | PLAC/NORX                                         | 3.53 (0.93-13.95)                    | PLAC/NORX                                           | 2.52 (0.68-9.46)                     |                                                                |                                      |
| IBUIV versus                                         |                                      | IBUIV versus                                      |                                      | IBUIV versus                                        |                                      |                                                                |                                      |
| PLAC/NORX                                            | 5.30 (2.81-10.22)                    | PLAC/NORX                                         | 5.47 (3.02-10.38)                    | PLAC/NORX                                           | 4.55 (2.69-8.01)                     |                                                                |                                      |
| Common within-network between-study variance         | 0.23 (0.04-0.57)                     | Common within-network between-study variance      | 0.20 (0.02-0.50)                     | Common within-network between-study variance        | 0.17 (0.01-0.45)                     | Common within-network between-study variance                   | 0.06 (0.00-0.48)                     |
| Regression coefficient (log OR scale)                | -0.039 (-0.172-0.096)                | Regression coefficient (log OR scale)             | -0.001 (-0.001-0.000)                | Regression coefficient (log OR scale)               | 0.022 (-0.002-0.047)                 | Regression coefficient (log OR scale)                          | -0.045 (-0.102-0.014)                |

eTable 38. Meta-regression Analysis Corresponding SUCRA values: PDA Closure

| Mean Gestational Age |                 | Mean Birth Weight |                 | Year of Publication |                 | Age initiation of Treatment |                 |
|----------------------|-----------------|-------------------|-----------------|---------------------|-----------------|-----------------------------|-----------------|
| Treatment            | Mean SUCRA (SD) | Treatment         | Mean SUCRA (SD) | Treatment           | Mean SUCRA (SD) | Treatment                   | Mean SUCRA (SD) |
| PARAPO               | 0.79 (0.15)     | PARAPO            | 0.82 (0.13)     | PARAPO              | 0.65 (0.19)     | PARAPO                      | 0.63 (0.28)     |
| INDOTHERS            | 0.45 (0.13)     | INDOTHERS         | 0.44 (0.13)     | INDOTHERS           | 0.44 (0.14)     | INDOTHERS                   | 0.68 (0.19)     |
| INDOIVCONT           | 0.41 (0.23)     | INDOIVCONT        | 0.42 (0.22)     | INDOIVCONT          | 0.47 (0.24)     | INDOIVCONT                  | 0.81 (0.27)     |
| INDOIV               | 0.52 (0.12)     | INDOIV            | 0.53 (0.11)     | INDOIV              | 0.54 (0.12)     | INDOIV                      | 0.72 (0.18)     |
| IBUPOHIGHDOSE        | 0.95 (0.10)     | IBUPOHIGHDOSE     | 0.95 (0.10)     | IBUPOHIGHDOSE       | 0.98 (0.05)     | IBUPO                       | 0.55 (0.22)     |
| IBUPO                | 0.68 (0.11)     | IBUPO             | 0.68 (0.11)     | IBUPO               | 0.72 (0.11)     | IBUIVCONT                   | 0.23 (0.20)     |
| IBUIVHIGHDOSE        | 0.76 (0.24)     | IBUIVHIGHDOSE     | 0.72 (0.25)     | IBUIVHIGHDOSE       | 0.77 (0.23)     | IBUIV                       | 0.38 (0.16)     |
| IBUIVCONT            | 0.20 (0.17)     | IBUIVCONT         | 0.18 (0.15)     | IBUIVCONT           | 0.16 (0.14)     | PLAC/NORX                   | 0.01 (0.03)     |
| IBUIV                | 0.24 (0.08)     | IBUIV             | 0.24 (0.08)     | IBUIV               | 0.26 (0.09)     |                             |                 |
| PLAC/NORX            | 0.00 (0.02)     | PLAC/NORX         | 0.00 (0.02)     | PLAC/NORX           | 0.01 (0.03)     |                             |                 |

**eTable 39. Meta-regression Analysis Results for Outcome: Need for repeat pharmacotherapy**

| Meta-regression NMA Results For Mean Gestational Age |                                      | Meta-regression NMA Results For Mean Birth Weight |                                      | Meta-regression NMA Results For Year of Publication |                                      | Meta-regression NMA Results For Age of Initiation of Treatment |                                      |
|------------------------------------------------------|--------------------------------------|---------------------------------------------------|--------------------------------------|-----------------------------------------------------|--------------------------------------|----------------------------------------------------------------|--------------------------------------|
| Treatment Comparison                                 | Network Meta-regression OR (95% CrI) | Treatment Comparison                              | Network Meta-regression OR (95% CrI) | Treatment Comparison                                | Network Meta-regression OR (95% CrI) | Treatment Comparison                                           | Network Meta-regression OR (95% CrI) |
| PARAPO versus                                        |                                      | PARAPO versus                                     |                                      | PARAPO versus                                       |                                      | PARAPO versus                                                  |                                      |
| INDOTHERS                                            | 0.77 (0.29-2.21)                     | INDOTHERS                                         | 0.79 (0.28-2.24)                     | INDOTHERS                                           | 0.78 (0.27-2.29)                     | INDOTHERS                                                      | 0.67 (0.11-3.45)                     |
| INDOIVCONT                                           | 0.44 (0.10-2.06)                     | INDOIVCONT                                        | 0.46 (0.10-2.17)                     | INDOIVCONT                                          | 0.58 (0.09-3.99)                     | INDOIVCONT                                                     | 0.35 (0.02-3.78)                     |
| INDOIV                                               | 0.47 (0.19-1.25)                     | INDOIV                                            | 0.48 (0.19-1.26)                     | INDOIV                                              | 0.54 (0.17-1.85)                     | INDOIV                                                         | 0.34 (0.04-1.93)                     |
| IBUPOHIGHDOSE                                        | 1.97 (0.42-9.94)                     | IBUPOHIGHDOSE                                     | 1.86 (0.41-8.92)                     | IBUPOHIGHDOSE                                       | 1.93 (0.38-11.04)                    | IBUPO                                                          | 0.51 (0.12-1.94)                     |
| IBUPO                                                | 0.85 (0.45-1.67)                     | IBUPO                                             | 0.87 (0.44-1.72)                     | IBUPO                                               | 0.87 (0.42-1.88)                     | IBUIV                                                          | 0.25 (0.03-1.56)                     |
| IBUIVHIGHDOSE                                        | 1.37 (0.25-8.51)                     | IBUIVHIGHDOSE                                     | 1.39 (0.24-8.72)                     | IBUIVHIGHDOSE                                       | 1.27 (0.25-7.02)                     | PLAC/NORX                                                      | 0.06 (0.01-0.39)                     |
| IBUIV                                                | 0.32 (0.13-0.79)                     | IBUIV                                             | 0.32 (0.12-0.83)                     | IBUIV                                               | 0.37 (0.11-1.32)                     | INDOTHERS versus                                               |                                      |
| PLAC/NORX                                            | 0.08 (0.02-0.28)                     | PLAC/NORX                                         | 0.07 (0.02-0.23)                     | PLAC/NORX                                           | 0.08 (0.02-0.37)                     | INDOIVCONT                                                     | 0.52 (0.06-3.16)                     |
| INDOTHERS versus                                     |                                      | INDOTHERS versus                                  |                                      | INDOTHERS versus                                    |                                      | INDOIV                                                         | 0.50 (0.15-1.29)                     |
| INDOIVCONT                                           | 0.58 (0.14-2.37)                     | INDOIVCONT                                        | 0.59 (0.14-2.35)                     | INDOIVCONT                                          | 0.75 (0.17-3.50)                     | IBUPO                                                          | 0.75 (0.25-2.48)                     |
| INDOIV                                               | 0.61 (0.35-1.05)                     | INDOIV                                            | 0.61 (0.36-1.07)                     | INDOIV                                              | 0.69 (0.40-1.23)                     | IBUIV                                                          | 0.37 (0.10-1.09)                     |
| IBUPOHIGHDOSE                                        | 2.56 (0.59-11.58)                    | IBUPOHIGHDOSE                                     | 2.35 (0.56-10.71)                    | IBUPOHIGHDOSE                                       | 2.47 (0.59-11.33)                    | PLAC/NORX                                                      | 0.09 (0.02-0.28)                     |
| IBUPO                                                | 1.10 (0.56-2.21)                     | IBUPO                                             | 1.10 (0.56-2.20)                     | IBUPO                                               | 1.12 (0.59-2.15)                     | INDOIVCONT versus                                              |                                      |
| IBUIVHIGHDOSE                                        | 1.77 (0.42-8.09)                     | IBUIVHIGHDOSE                                     | 1.76 (0.42-8.35)                     | IBUIVHIGHDOSE                                       | 1.63 (0.39-7.12)                     | INDOIV                                                         | 0.96 (0.18-5.03)                     |
| IBUIV                                                | 0.41 (0.21-0.77)                     | IBUIV                                             | 0.41 (0.21-0.78)                     | IBUIV                                               | 0.48 (0.24-0.96)                     | IBUPO                                                          | 1.45 (0.21-13.99)                    |
| PLAC/NORX                                            | 0.10 (0.04-0.23)                     | PLAC/NORX                                         | 0.09 (0.04-0.20)                     | PLAC/NORX                                           | 0.10 (0.04-0.26)                     | IBUIV                                                          | 0.72 (0.15-3.13)                     |
| INDOIVCONT versus                                    |                                      | INDOIVCONT versus                                 |                                      | INDOIVCONT versus                                   |                                      | PLAC/NORX                                                      | 0.17 (0.03-0.99)                     |
| INDOIV                                               | 1.06 (0.28-3.85)                     | INDOIV                                            | 1.04 (0.29-3.93)                     | INDOIV                                              | 0.93 (0.23-3.50)                     | INDOIV versus                                                  |                                      |
| IBUPOHIGHDOSE                                        | 4.44 (0.62-31.52)                    | IBUPOHIGHDOSE                                     | 4.08 (0.57-29.66)                    | IBUPOHIGHDOSE                                       | 3.27 (0.48-21.76)                    | IBUPO                                                          | 1.51 (0.45-7.35)                     |
| IBUPO                                                | 1.92 (0.47-7.35)                     | IBUPO                                             | 1.90 (0.46-7.46)                     | IBUPO                                               | 1.48 (0.31-6.64)                     | IBUIV                                                          | 0.76 (0.33-1.60)                     |
| IBUIVHIGHDOSE                                        | 3.08 (0.49-21.79)                    | IBUIVHIGHDOSE                                     | 2.97 (0.45-20.26)                    | IBUIVHIGHDOSE                                       | 2.19 (0.32-14.91)                    | PLAC/NORX                                                      | 0.18 (0.06-0.49)                     |
| IBUIV                                                | 0.71 (0.20-2.33)                     | IBUIV                                             | 0.70 (0.20-2.35)                     | IBUIV                                               | 0.64 (0.18-2.16)                     | IBUPO versus                                                   |                                      |
| PLAC/NORX                                            | 0.17 (0.04-0.77)                     | PLAC/NORX                                         | 0.15 (0.03-0.64)                     | PLAC/NORX                                           | 0.13 (0.03-0.55)                     | IBUIV                                                          | 0.50 (0.09-1.87)                     |
| INDOIV versus                                        |                                      | INDOIV versus                                     |                                      | INDOIV versus                                       |                                      | PLAC/NORX                                                      | 0.12 (0.02-0.46)                     |
| IBUPOHIGHDOSE                                        | 4.16 (0.96-19.01)                    | IBUPOHIGHDOSE                                     | 3.86 (0.91-16.92)                    | IBUPOHIGHDOSE                                       | 3.56 (0.87-15.28)                    | IBUPO versus                                                   |                                      |
| IBUPO                                                | 1.80 (0.94-3.44)                     | IBUPO                                             | 1.80 (0.95-3.41)                     | IBUPO                                               | 1.61 (0.78-3.18)                     | PLAC/NORX                                                      | 0.24 (0.08-0.68)                     |
| IBUIVHIGHDOSE                                        | 2.92 (0.69-13.38)                    | IBUIVHIGHDOSE                                     | 2.86 (0.67-12.89)                    | IBUIVHIGHDOSE                                       | 2.35 (0.58-9.96)                     |                                                                |                                      |
| IBUIV                                                | 0.68 (0.42-1.03)                     | IBUIV                                             | 0.67 (0.41-1.03)                     | IBUIV                                               | 0.69 (0.43-1.08)                     |                                                                |                                      |
| PLAC/NORX                                            | 0.17 (0.07-0.37)                     | PLAC/NORX                                         | 0.15 (0.07-0.30)                     | PLAC/NORX                                           | 0.15 (0.07-0.32)                     |                                                                |                                      |
| IBUPOHIGHDOSE versus                                 |                                      | IBUPOHIGHDOSE versus                              |                                      | IBUPOHIGHDOSE versus                                |                                      |                                                                |                                      |
| IBUPO                                                | 0.44 (0.11-1.68)                     | IBUPO                                             | 0.47 (0.12-1.74)                     | IBUPO                                               | 0.45 (0.11-1.71)                     |                                                                |                                      |
| IBUIVHIGHDOSE                                        | 0.69 (0.09-5.64)                     | IBUIVHIGHDOSE                                     | 0.74 (0.10-5.70)                     | IBUIVHIGHDOSE                                       | 0.65 (0.09-4.73)                     |                                                                |                                      |
| IBUIV                                                | 0.16 (0.03-0.70)                     | IBUIV                                             | 0.17 (0.04-0.75)                     | IBUIV                                               | 0.19 (0.05-0.78)                     |                                                                |                                      |
| PLAC/NORX                                            | 0.04 (0.01-0.20)                     | PLAC/NORX                                         | 0.04 (0.01-0.18)                     | PLAC/NORX                                           | 0.04 (0.01-0.20)                     |                                                                |                                      |
| IBUPO versus                                         |                                      | IBUPO versus                                      |                                      | IBUPO versus                                        |                                      |                                                                |                                      |
| IBUIVHIGHDOSE                                        | 1.63 (0.36-7.98)                     | IBUIVHIGHDOSE                                     | 1.59 (0.35-7.87)                     | IBUIVHIGHDOSE                                       | 1.46 (0.35-6.29)                     |                                                                |                                      |
| IBUIV                                                | 0.37 (0.19-0.69)                     | IBUIV                                             | 0.37 (0.19-0.69)                     | IBUIV                                               | 0.43 (0.21-0.90)                     |                                                                |                                      |
| PLAC/NORX                                            | 0.09 (0.04-0.24)                     | PLAC/NORX                                         | 0.08 (0.03-0.20)                     | PLAC/NORX                                           | 0.09 (0.03-0.27)                     |                                                                |                                      |
| IBUIVHIGHDOSE versus                                 |                                      | IBUIVHIGHDOSE versus                              |                                      | IBUIVHIGHDOSE versus                                |                                      |                                                                |                                      |
| IBUIV                                                | 0.23 (0.05-0.90)                     | IBUIV                                             | 0.24 (0.05-0.90)                     | IBUIV                                               | 0.30 (0.07-1.15)                     |                                                                |                                      |
| PLAC/NORX                                            | 0.06 (0.01-0.26)                     | PLAC/NORX                                         | 0.05 (0.01-0.23)                     | PLAC/NORX                                           | 0.06 (0.01-0.31)                     |                                                                |                                      |
| IBUIV versus                                         |                                      | IBUIV versus                                      |                                      | IBUIV versus                                        |                                      |                                                                |                                      |
| PLAC/NORX                                            | 0.25 (0.11-0.56)                     | PLAC/NORX                                         | 0.22 (0.10-0.46)                     | PLAC/NORX                                           | 0.21 (0.10-0.45)                     |                                                                |                                      |
| Common within-network between-study variance         | 0.05 (0.00-0.40)                     | Common within-network between-study variance      | 0.04 (0.00-0.39)                     | Common within-network between-study variance        | 0.04 (0.00-0.36)                     | Common within-network between-study variance                   | 0.10 (0.00-1.42)                     |
| Regression coefficient (log OR scale)                | -0.052 (-0.223-0.106)                | Regression coefficient (log OR scale)             | 0.000 (-0.002-0.001)                 | Regression coefficient (log OR scale)               | -0.009 (-0.053-0.032)                | Regression coefficient (log OR scale)                          | -0.047 (-0.197-0.088)                |

**eTable 40. Meta-regression Analysis Corresponding SUCRA values: Need for repeat pharmacotherapy**

| Mean Gestational Age |                 | Mean Birth Weight |                 | Year of Publication |                 | Age of initiation of Treatment |                 |
|----------------------|-----------------|-------------------|-----------------|---------------------|-----------------|--------------------------------|-----------------|
| Treatment            | Mean SUCRA (SD) | Treatment         | Mean SUCRA (SD) | Treatment           | Mean SUCRA (SD) | Treatment                      | Mean SUCRA (SD) |
| PARAPO               | 0.71 (0.19)     | PARAPO            | 0.71 (0.19)     | PARAPO              | 0.68 (0.24)     | PARAPO                         | 0.87 (0.21)     |
| INDOTHERS            | 0.59 (0.16)     | INDOTHERS         | 0.60 (0.16)     | INDOTHERS           | 0.57 (0.17)     | INDOTHERS                      | 0.78 (0.17)     |
| INDOIVCONT           | 0.36 (0.23)     | INDOIVCONT        | 0.37 (0.24)     | INDOIVCONT          | 0.44 (0.28)     | INDOIVCONT                     | 0.49 (0.29)     |
| INDOIV               | 0.34 (0.10)     | INDOIV            | 0.34 (0.10)     | INDOIV              | 0.36 (0.13)     | INDOIV                         | 0.45 (0.18)     |
| IBUPOHIGHDOSE        | 0.89 (0.17)     | IBUPOHIGHDOSE     | 0.88 (0.18)     | IBUPOHIGHDOSE       | 0.88 (0.18)     | IBUPO                          | 0.62 (0.21)     |
| IBUPO                | 0.64 (0.13)     | IBUPO             | 0.64 (0.13)     | IBUPO               | 0.63 (0.14)     | IBUIV                          | 0.29 (0.16)     |
| IBUIVHIGHDOSE        | 0.79 (0.22)     | IBUIVHIGHDOSE     | 0.79 (0.23)     | IBUIVHIGHDOSE       | 0.75 (0.25)     | PLAC/NORX                      | 0.01 (0.04)     |
| IBUIV                | 0.17 (0.07)     | IBUIV             | 0.17 (0.07)     | IBUIV               | 0.18 (0.08)     |                                |                 |
| PLAC/NORX            | 0.00 (0.02)     | PLAC/NORX         | 0.00 (0.01)     | PLAC/NORX           | 0.00 (0.01)     |                                |                 |

**eTable 41. Meta-regression Analysis Results for Outcome: Neonatal Mortality**

| Meta-regression NMA Results For Mean Gestational Age |                                      | Meta-regression NMA Results For Mean Birth Weight |                                      | Meta-regression NMA Results For Year of Publication |                                      | Meta-regression NMA Results For Age of Initiation of Treatment |                                      |
|------------------------------------------------------|--------------------------------------|---------------------------------------------------|--------------------------------------|-----------------------------------------------------|--------------------------------------|----------------------------------------------------------------|--------------------------------------|
| Treatment Comparison                                 | Network Meta-regression OR (95% CrI) | Treatment Comparison                              | Network Meta-regression OR (95% CrI) | Treatment Comparison                                | Network Meta-regression OR (95% CrI) | Treatment Comparison                                           | Network Meta-regression OR (95% CrI) |
| PARAPO versus                                        |                                      | PARAPO versus                                     |                                      | PARAPO versus                                       |                                      | INDOTHERS versus                                               |                                      |
| INDOTHERS                                            | 0.75 (0.29-1.91)                     | INDOTHERS                                         | 0.80 (0.32-2.01)                     | INDOTHERS                                           | 0.78 (0.31-1.98)                     | INDOIVCONT                                                     | 0.77 (0.09-6.22)                     |
| INDOIVCONT                                           | 0.40 (0.06-2.44)                     | INDOIVCONT                                        | 0.42 (0.06-2.32)                     | INDOIVCONT                                          | 0.44 (0.06-2.86)                     | INDOIV                                                         | 0.94 (0.46-1.85)                     |
| INDOIV                                               | 0.86 (0.37-2.01)                     | INDOIV                                            | 0.88 (0.39-2.04)                     | INDOIV                                              | 0.91 (0.36-2.30)                     | IBUPO                                                          | 2.33 (0.80-7.46)                     |
| IBUPOHIGHDOSE                                        | 0.37 (0.01-6.53)                     | IBUPOHIGHDOSE                                     | 0.45 (0.01-7.33)                     | IBUPOHIGHDOSE                                       | 0.43 (0.01-8.05)                     | IBUIVCONT                                                      | 1.17 (0.02-55.69)                    |
| IBUPO                                                | 1.00 (0.46-2.24)                     | IBUPO                                             | 1.05 (0.49-2.27)                     | IBUPO                                               | 1.07 (0.47-2.55)                     | IBUIV                                                          | 1.12 (0.47-2.73)                     |
| IBUIVHIGHDOSE                                        | 0.72 (0.12-4.73)                     | IBUIVHIGHDOSE                                     | 0.86 (0.15-5.03)                     | IBUIVHIGHDOSE                                       | 0.79 (0.15-4.47)                     | PLAC/NORX                                                      | 0.65 (0.32-1.26)                     |
| IBUIVCONT                                            | 0.91 (0.02-37.98)                    | IBUIVCONT                                         | 1.03 (0.02-58.09)                    | IBUIVCONT                                           | 0.89 (0.02-29.27)                    | INDOIVCONT versus                                              |                                      |
| IBUIV                                                | 0.94 (0.38-2.40)                     | IBUIV                                             | 0.97 (0.41-2.40)                     | IBUIV                                               | 1.03 (0.37-2.97)                     | INDOIV                                                         | 1.19 (0.16-9.46)                     |
| PLAC/NORX                                            | 0.56 (0.22-1.39)                     | PLAC/NORX                                         | 0.61 (0.25-1.49)                     | PLAC/NORX                                           | 0.61 (0.23-1.70)                     | IBUPO                                                          | 3.04 (0.31-30.75)                    |
| INDOTHERS versus                                     |                                      | INDOTHERS versus                                  |                                      | INDOTHERS versus                                    |                                      | IBUIVCONT                                                      |                                      |
| INDOIVCONT                                           | 0.54 (0.08-2.84)                     | INDOIVCONT                                        | 0.53 (0.08-2.59)                     | INDOIVCONT                                          | 0.57 (0.09-2.97)                     | IBUIV                                                          | 1.45 (0.23-9.84)                     |
| INDOIV                                               | 1.15 (0.74-1.82)                     | INDOIV                                            | 1.11 (0.71-1.73)                     | INDOIV                                              | 1.18 (0.73-1.88)                     | PLAC/NORX                                                      | 0.82 (0.11-6.57)                     |
| IBUPOHIGHDOSE                                        | 0.50 (0.01-7.63)                     | IBUPOHIGHDOSE                                     | 0.56 (0.02-8.37)                     | IBUPOHIGHDOSE                                       | 0.57 (0.01-9.35)                     | INDOIV versus                                                  |                                      |
| IBUPO                                                | 1.35 (0.71-2.56)                     | IBUPO                                             | 1.31 (0.67-2.55)                     | IBUPO                                               | 1.38 (0.70-2.71)                     | IBUPO                                                          | 2.48 (0.84-8.16)                     |
| IBUIVHIGHDOSE                                        | 0.97 (0.19-4.90)                     | IBUIVHIGHDOSE                                     | 1.07 (0.23-5.25)                     | IBUIVHIGHDOSE                                       | 1.02 (0.21-4.92)                     | IBUIVCONT                                                      | 1.26 (0.02-58.52)                    |
| IBUIVCONT                                            | 1.19 (0.04-46.44)                    | IBUIVCONT                                         | 1.28 (0.03-70.42)                    | IBUIVCONT                                           | 1.14 (0.02-37.29)                    | IBUIV                                                          | 1.20 (0.62-2.45)                     |
| IBUIV                                                | 1.28 (0.69-2.41)                     | IBUIV                                             | 1.21 (0.66-2.32)                     | IBUIV                                               | 1.33 (0.67-2.60)                     | PLAC/NORX                                                      | 0.69 (0.39-1.24)                     |
| PLAC/NORX                                            | 0.74 (0.44-1.28)                     | PLAC/NORX                                         | 0.75 (0.45-1.32)                     | PLAC/NORX                                           | 0.79 (0.43-1.47)                     | IBUPO versus                                                   |                                      |
| INDOIVCONT versus                                    |                                      | INDOIVCONT versus                                 |                                      | INDOIVCONT versus                                   |                                      | IBUIVCONT                                                      |                                      |
| INDOIV                                               | 2.14 (0.42-13.28)                    | INDOIV                                            | 2.10 (0.47-12.92)                    | INDOIV                                              | 2.07 (0.43-11.65)                    | IBUIV                                                          | 0.50 (0.01-25.72)                    |
| IBUPOHIGHDOSE                                        | 0.95 (0.02-25.30)                    | IBUPOHIGHDOSE                                     | 1.05 (0.03-29.01)                    | IBUPOHIGHDOSE                                       | 0.95 (0.02-25.98)                    | PLAC/NORX                                                      | 0.48 (0.13-1.63)                     |
| IBUPO                                                | 2.51 (0.45-16.41)                    | IBUPO                                             | 2.51 (0.51-15.12)                    | IBUPO                                               | 2.42 (0.48-14.84)                    | IBUIVCONT versus                                               |                                      |
| IBUIVHIGHDOSE                                        | 1.78 (0.19-18.14)                    | IBUIVHIGHDOSE                                     | 2.11 (0.25-21.54)                    | IBUIVHIGHDOSE                                       | 1.81 (0.21-17.39)                    | IBUIV                                                          | 0.97 (0.02-56.04)                    |
| IBUIVCONT                                            | 2.23 (0.04-136.70)                   | IBUIVCONT                                         | 2.56 (0.05-179.90)                   | IBUIVCONT                                           | 1.98 (0.03-86.87)                    | PLAC/NORX                                                      | 0.54 (0.01-36.77)                    |
| IBUIV                                                | 2.37 (0.48-13.56)                    | IBUIV                                             | 2.29 (0.54-13.45)                    | IBUIV                                               | 2.30 (0.51-12.69)                    | IBUIV versus                                                   |                                      |
| PLAC/NORX                                            | 1.39 (0.25-8.66)                     | PLAC/NORX                                         | 1.43 (0.31-8.98)                     | PLAC/NORX                                           | 1.38 (0.29-7.86)                     | PLAC/NORX                                                      | 0.58 (0.28-1.16)                     |
| INDOIV versus                                        |                                      | INDOIV versus                                     |                                      | INDOIV versus                                       |                                      |                                                                |                                      |
| IBUPOHIGHDOSE                                        | 0.43 (0.01-6.88)                     | IBUPOHIGHDOSE                                     | 0.51 (0.02-7.81)                     | IBUPOHIGHDOSE                                       | 0.47 (0.01-8.00)                     |                                                                |                                      |
| IBUPO                                                | 1.17 (0.65-2.11)                     | IBUPO                                             | 1.18 (0.65-2.17)                     | IBUPO                                               | 1.17 (0.65-2.17)                     |                                                                |                                      |
| IBUIVHIGHDOSE                                        | 0.84 (0.17-4.36)                     | IBUIVHIGHDOSE                                     | 0.97 (0.21-4.67)                     | IBUIVHIGHDOSE                                       | 0.87 (0.19-4.05)                     |                                                                |                                      |
| IBUIVCONT                                            | 1.04 (0.03-39.00)                    | IBUIVCONT                                         | 1.16 (0.03-62.43)                    | IBUIVCONT                                           | 0.97 (0.02-30.28)                    |                                                                |                                      |
| IBUIV                                                | 1.10 (0.68-1.81)                     | IBUIV                                             | 1.10 (0.67-1.80)                     | IBUIV                                               | 1.13 (0.69-1.87)                     |                                                                |                                      |
| PLAC/NORX                                            | 0.65 (0.40-1.04)                     | PLAC/NORX                                         | 0.68 (0.42-1.09)                     | PLAC/NORX                                           | 0.67 (0.42-1.07)                     |                                                                |                                      |
| IBUPOHIGHDOSE versus                                 |                                      | IBUPOHIGHDOSE versus                              |                                      | IBUPOHIGHDOSE versus                                |                                      |                                                                |                                      |
| IBUPO                                                | 2.72 (0.18-90.56)                    | IBUPO                                             | 2.31 (0.16-65.91)                    | IBUPO                                               | 2.48 (0.16-103.90)                   |                                                                |                                      |
| IBUIVHIGHDOSE                                        | 2.00 (0.08-90.59)                    | IBUIVHIGHDOSE                                     | 1.94 (0.09-74.02)                    | IBUIVHIGHDOSE                                       | 1.84 (0.07-86.77)                    |                                                                |                                      |
| IBUIVCONT                                            | 2.50 (0.02-350.10)                   | IBUIVCONT                                         | 2.59 (0.03-426.10)                   | IBUIVCONT                                           | 2.22 (0.02-254.30)                   |                                                                |                                      |
| IBUIV                                                | 2.55 (0.15-90.95)                    | IBUIV                                             | 2.15 (0.14-65.74)                    | IBUIV                                               | 2.40 (0.15-105.50)                   |                                                                |                                      |
| PLAC/NORX                                            | 1.52 (0.09-49.98)                    | PLAC/NORX                                         | 1.33 (0.09-40.32)                    | PLAC/NORX                                           | 1.43 (0.08-64.01)                    |                                                                |                                      |
| IBUPO versus                                         |                                      | IBUPO versus                                      |                                      | IBUPO versus                                        |                                      |                                                                |                                      |
| IBUIVHIGHDOSE                                        | 0.72 (0.13-3.79)                     | IBUIVHIGHDOSE                                     | 0.82 (0.16-4.15)                     | IBUIVHIGHDOSE                                       | 0.73 (0.15-3.60)                     |                                                                |                                      |
| IBUIVCONT                                            | 0.89 (0.03-33.53)                    | IBUIVCONT                                         | 0.97 (0.02-51.56)                    | IBUIVCONT                                           | 0.82 (0.02-25.78)                    |                                                                |                                      |
| IBUIV                                                | 0.95 (0.50-1.82)                     | IBUIV                                             | 0.92 (0.48-1.78)                     | IBUIV                                               | 0.97 (0.49-1.85)                     |                                                                |                                      |
| PLAC/NORX                                            | 0.55 (0.29-1.02)                     | PLAC/NORX                                         | 0.58 (0.31-1.07)                     | PLAC/NORX                                           | 0.57 (0.30-1.09)                     |                                                                |                                      |
| IBUIVHIGHDOSE versus                                 |                                      | IBUIVHIGHDOSE versus                              |                                      | IBUIVHIGHDOSE versus                                |                                      |                                                                |                                      |
| IBUIVCONT                                            | 1.19 (0.03-62.65)                    | IBUIVCONT                                         | 1.19 (0.02-83.28)                    | IBUIVCONT                                           | 1.07 (0.02-43.68)                    |                                                                |                                      |
| IBUIV                                                | 1.31 (0.29-6.19)                     | IBUIV                                             | 1.14 (0.25-5.07)                     | IBUIV                                               | 1.30 (0.30-5.91)                     |                                                                |                                      |
| PLAC/NORX                                            | 0.78 (0.15-4.06)                     | PLAC/NORX                                         | 0.70 (0.15-3.31)                     | PLAC/NORX                                           | 0.77 (0.16-3.87)                     |                                                                |                                      |
| IBUIVCONT versus                                     |                                      | IBUIVCONT versus                                  |                                      | IBUIVCONT versus                                    |                                      |                                                                |                                      |
| IBUIV                                                | 1.05 (0.03-35.26)                    | IBUIV                                             | 0.95 (0.02-40.48)                    | IBUIV                                               | 1.18 (0.04-54.37)                    |                                                                |                                      |
| PLAC/NORX                                            | 0.63 (0.02-21.65)                    | PLAC/NORX                                         | 0.59 (0.01-26.33)                    | PLAC/NORX                                           | 0.69 (0.02-33.84)                    |                                                                |                                      |
| IBUIV versus                                         |                                      | IBUIV versus                                      |                                      | IBUIV versus                                        |                                      |                                                                |                                      |
| PLAC/NORX                                            | 0.59 (0.33-1.03)                     | PLAC/NORX                                         | 0.62 (0.35-1.11)                     | PLAC/NORX                                           | 0.59 (0.33-1.03)                     |                                                                |                                      |
| Common within-network between-study variance         | 0.04 (0.00-0.36)                     | Common within-network between-study variance      | 0.04 (0.00-0.36)                     | Common within-network between-study variance        | 0.04 (0.00-0.36)                     | Common within-network between-study variance                   | 0.06 (0.00-0.71)                     |
| Regression coefficient (log OR scale)                | 0.013 (-0.142-0.160)                 | Regression coefficient (log OR scale)             | 0.000 (-0.001-0.001)                 | Regression coefficient (log OR scale)               | -0.004 (-0.034-0.025)                | Regression coefficient (log OR scale)                          | 0.017 (-0.064-0.099)                 |

**eTable 42. Meta-regression Analysis Corresponding SUCRA values: Neonatal Mortality**

| Mean Gestational Age |                 | Mean Birth Weight |                 | Year of Publication |                 | Age of initiation of Treatment |                 |
|----------------------|-----------------|-------------------|-----------------|---------------------|-----------------|--------------------------------|-----------------|
| Treatment            | Mean SUCRA (SD) | Treatment         | Mean SUCRA (SD) | Treatment           | Mean SUCRA (SD) | Treatment                      | Mean SUCRA (SD) |
| PARAPO               | 0.67 (0.26)     | PARAPO            | 0.64 (0.27)     | PARAPO              | 0.63 (0.28)     | INDOTHERS                      | 0.50 (0.23)     |
| INDOTHERS            | 0.47 (0.20)     | INDOTHERS         | 0.48 (0.21)     | INDOTHERS           | 0.45 (0.21)     | INDOIVCONT                     | 0.39 (0.36)     |
| INDOIVCONT           | 0.26 (0.29)     | INDOIVCONT        | 0.24 (0.28)     | INDOIVCONT          | 0.27 (0.30)     | INDOIV                         | 0.45 (0.20)     |
| INDOIV               | 0.59 (0.18)     | INDOIV            | 0.57 (0.18)     | INDOIV              | 0.59 (0.18)     | IBUPO                          | 0.87 (0.17)     |
| IBUPOHIGHDOSE        | 0.32 (0.38)     | IBUPOHIGHDOSE     | 0.34 (0.38)     | IBUPOHIGHDOSE       | 0.34 (0.39)     | IBUIVCONT                      | 0.53 (0.43)     |
| IBUPO                | 0.70 (0.20)     | IBUPO             | 0.70 (0.20)     | IBUPO               | 0.71 (0.19)     | IBUIV                          | 0.59 (0.21)     |
| IBUIVHIGHDOSE        | 0.49 (0.34)     | IBUIVHIGHDOSE     | 0.54 (0.35)     | IBUIVHIGHDOSE       | 0.50 (0.34)     | PLAC/NORX                      | 0.17 (0.16)     |
| IBUIVCONT            | 0.55 (0.42)     | IBUIVCONT         | 0.57 (0.42)     | IBUIVCONT           | 0.53 (0.42)     |                                |                 |
| IBUIV                | 0.67 (0.19)     | IBUIV             | 0.65 (0.20)     | IBUIV               | 0.69 (0.19)     |                                |                 |
| PLAC/NORX            | 0.27 (0.15)     | PLAC/NORX         | 0.26 (0.15)     | PLAC/NORX           | 0.28 (0.16)     |                                |                 |

**eTable 43. Meta-regression Analysis Results for Outcome: Risk of Necrotizing Enterocolitis**

| Meta-regression NMA Results For Mean Gestational Age |                                      | Meta-regression NMA Results For Mean Birth Weight |                                      | Meta-regression NMA Results For Year of Publication |                                      | Meta-regression NMA Results For Age of Initiation of Treatment |                                      |
|------------------------------------------------------|--------------------------------------|---------------------------------------------------|--------------------------------------|-----------------------------------------------------|--------------------------------------|----------------------------------------------------------------|--------------------------------------|
| Treatment Comparison                                 | Network Meta-regression OR (95% CrI) | Treatment Comparison                              | Network Meta-regression OR (95% CrI) | Treatment Comparison                                | Network Meta-regression OR (95% CrI) | Treatment Comparison                                           | Network Meta-regression OR (95% CrI) |
| PARAPO <i>versus</i>                                 |                                      | PARAPO <i>versus</i>                              |                                      | PARAPO <i>versus</i>                                |                                      | PARAPO <i>versus</i>                                           |                                      |
| INDOTHERS                                            | 0.29 (0.08-1.02)                     | INDOTHERS                                         | 0.27 (0.07-0.91)                     | INDOTHERS                                           | 0.27 (0.08-0.92)                     | INDOTHERS                                                      | 0.10 (0.01-0.79)                     |
| INDOIVCONT                                           | 1.06 (0.20-5.76)                     | INDOIVCONT                                        | 1.03 (0.19-5.65)                     | INDOIVCONT                                          | 0.94 (0.18-5.59)                     | INDOIVCONT                                                     | 0.57 (0.04-6.52)                     |
| INDOIV                                               | 0.45 (0.15-1.32)                     | INDOIV                                            | 0.43 (0.13-1.29)                     | INDOIV                                              | 0.42 (0.14-1.29)                     | INDOIV                                                         | 0.32 (0.04-2.36)                     |
| IBUPOHIGHDOSE                                        | 1.62 (0.23-13.13)                    | IBUPOHIGHDOSE                                     | 1.46 (0.21-11.53)                    | IBUPOHIGHDOSE                                       | 1.47 (0.21-10.29)                    | IBUPO                                                          | 0.73 (0.14-3.69)                     |
| IBUPO                                                | 1.16 (0.44-3.16)                     | IBUPO                                             | 1.12 (0.39-2.99)                     | IBUPO                                               | 1.08 (0.42-2.97)                     | IBUIVCONT                                                      | 1.10 (0.07-15.26)                    |
| IBUIVHIGHDOSE                                        | 0.49 (0.05-4.82)                     | IBUIVHIGHDOSE                                     | 0.43 (0.04-3.88)                     | IBUIVHIGHDOSE                                       | 0.46 (0.05-3.44)                     | IBUIV                                                          | 0.42 (0.04-3.30)                     |
| IBUIVCONT                                            | 1.81 (0.27-14.88)                    | IBUIVCONT                                         | 1.69 (0.25-13.47)                    | IBUIVCONT                                           | 1.70 (0.28-12.97)                    | PLAC/NORX                                                      | 0.49 (0.06-3.75)                     |
| IBUIV                                                | 0.66 (0.22-2.11)                     | IBUIV                                             | 0.65 (0.20-1.98)                     | IBUIV                                               | 0.63 (0.20-2.09)                     | INDOTHERS <i>versus</i>                                        |                                      |
| PLAC/NORX                                            | 0.75 (0.21-2.69)                     | PLAC/NORX                                         | 0.71 (0.19-2.77)                     | PLAC/NORX                                           | 0.72 (0.21-2.53)                     | INDOIVCONT                                                     | 5.51 (0.95-32.44)                    |
| INDOTHERS <i>versus</i>                              |                                      | INDOTHERS <i>versus</i>                           |                                      | INDOTHERS <i>versus</i>                             |                                      | INDOIV                                                         |                                      |
| INDOIVCONT                                           | 3.54 (0.82-16.15)                    | INDOIVCONT                                        | 3.81 (0.89-16.83)                    | INDOIVCONT                                          | 3.49 (0.80-16.74)                    | IBUPO                                                          | 7.02 (2.00-29.92)                    |
| INDOIV                                               | 1.51 (0.84-2.77)                     | INDOIV                                            | 1.57 (0.90-2.74)                     | INDOIV                                              | 1.54 (0.89-2.78)                     | IBUIVCONT                                                      | 10.59 (1.60-78.09)                   |
| IBUPOHIGHDOSE                                        | 5.44 (0.91-37.59)                    | IBUPOHIGHDOSE                                     | 5.43 (0.90-35.52)                    | IBUPOHIGHDOSE                                       | 5.30 (0.88-34.53)                    | IBUIV                                                          | 4.01 (1.38-12.33)                    |
| IBUPO                                                | 3.92 (1.75-9.10)                     | IBUPO                                             | 4.03 (1.83-9.26)                     | IBUPO                                               | 4.04 (1.80-9.27)                     | PLAC/NORX                                                      | 4.64 (1.52-14.91)                    |
| IBUIVHIGHDOSE                                        | 1.66 (0.23-11.82)                    | IBUIVHIGHDOSE                                     | 1.57 (0.21-12.14)                    | IBUIVHIGHDOSE                                       | 1.68 (0.23-12.04)                    | INDOIVCONT <i>versus</i>                                       |                                      |
| IBUIVCONT                                            | 6.08 (1.14-41.00)                    | IBUIVCONT                                         | 6.20 (1.17-38.04)                    | IBUIVCONT                                           | 6.25 (1.16-43.54)                    | INDOIV                                                         | 0.56 (0.12-2.57)                     |
| IBUIV                                                | 2.25 (1.07-4.94)                     | IBUIV                                             | 2.33 (1.14-5.04)                     | IBUIV                                               | 2.32 (1.07-5.06)                     | IBUPO                                                          | 1.30 (0.19-9.64)                     |
| PLAC/NORX                                            | 2.51 (1.05-6.33)                     | PLAC/NORX                                         | 2.61 (1.07-6.53)                     | PLAC/NORX                                           | 2.66 (1.06-6.77)                     | IBUIVCONT                                                      | 1.92 (0.23-17.03)                    |
| INDOIVCONT <i>versus</i>                             |                                      | INDOIVCONT <i>versus</i>                          |                                      | INDOIVCONT <i>versus</i>                            |                                      | IBUIV                                                          |                                      |
| INDOIV                                               | 0.42 (0.11-1.68)                     | INDOIV                                            | 0.41 (0.10-1.58)                     | INDOIV                                              | 0.45 (0.11-1.72)                     | PLAC/NORX                                                      | 0.85 (0.17-4.41)                     |
| IBUPOHIGHDOSE                                        | 1.54 (0.17-15.10)                    | IBUPOHIGHDOSE                                     | 1.46 (0.16-12.39)                    | IBUPOHIGHDOSE                                       | 1.51 (0.17-12.82)                    | INDOIV <i>versus</i>                                           |                                      |
| IBUPO                                                | 1.11 (0.26-4.62)                     | IBUPO                                             | 1.07 (0.24-4.54)                     | IBUPO                                               | 1.15 (0.26-4.57)                     | IBUPO                                                          | 2.33 (0.65-9.44)                     |
| IBUIVHIGHDOSE                                        | 0.47 (0.05-4.49)                     | IBUIVHIGHDOSE                                     | 0.41 (0.04-3.71)                     | IBUIVHIGHDOSE                                       | 0.47 (0.05-4.61)                     | IBUIVCONT                                                      | 3.46 (0.61-21.64)                    |
| IBUIVCONT                                            | 1.72 (0.23-15.09)                    | IBUIVCONT                                         | 1.68 (0.21-13.13)                    | IBUIVCONT                                           | 1.80 (0.23-14.99)                    | IBUIV                                                          | 1.32 (0.68-2.59)                     |
| IBUIV                                                | 0.63 (0.17-2.23)                     | IBUIV                                             | 0.63 (0.17-2.14)                     | IBUIV                                               | 0.67 (0.18-2.32)                     | PLAC/NORX                                                      | 1.53 (0.70-3.45)                     |
| PLAC/NORX                                            | 0.71 (0.17-3.20)                     | PLAC/NORX                                         | 0.70 (0.15-2.97)                     | PLAC/NORX                                           | 0.75 (0.17-3.28)                     | IBUPO <i>versus</i>                                            |                                      |
| INDOIV <i>versus</i>                                 |                                      | INDOIV <i>versus</i>                              |                                      | INDOIV <i>versus</i>                                |                                      | IBUIVCONT                                                      |                                      |
| IBUPOHIGHDOSE                                        | 3.65 (0.61-23.87)                    | IBUPOHIGHDOSE                                     | 3.46 (0.62-21.59)                    | IBUPOHIGHDOSE                                       | 3.39 (0.58-20.85)                    | IBUIV                                                          | 0.56 (0.14-2.23)                     |
| IBUPO                                                | 2.62 (1.34-5.29)                     | IBUPO                                             | 2.58 (1.34-5.13)                     | IBUPO                                               | 2.60 (1.31-5.19)                     | PLAC/NORX                                                      | 0.66 (0.17-2.47)                     |
| IBUIVHIGHDOSE                                        | 1.11 (0.16-7.34)                     | IBUIVHIGHDOSE                                     | 1.00 (0.14-7.39)                     | IBUIVHIGHDOSE                                       | 1.08 (0.15-7.41)                     | IBUIVCONT <i>versus</i>                                        |                                      |
| IBUIVCONT                                            | 4.06 (0.82-24.84)                    | IBUIVCONT                                         | 3.96 (0.80-22.86)                    | IBUIVCONT                                           | 3.98 (0.82-25.51)                    | IBUIV                                                          | 0.38 (0.07-1.87)                     |
| IBUIV                                                | 1.50 (0.86-2.57)                     | IBUIV                                             | 1.50 (0.90-2.61)                     | IBUIV                                               | 1.49 (0.85-2.59)                     | PLAC/NORX                                                      | 0.45 (0.07-2.73)                     |
| PLAC/NORX                                            | 1.68 (0.79-3.55)                     | PLAC/NORX                                         | 1.66 (0.81-3.53)                     | PLAC/NORX                                           | 1.70 (0.81-3.62)                     | IBUIV <i>versus</i>                                            |                                      |
| IBUPOHIGHDOSE <i>versus</i>                          |                                      | IBUPOHIGHDOSE <i>versus</i>                       |                                      | IBUPOHIGHDOSE <i>versus</i>                         |                                      | PLAC/NORX                                                      |                                      |
| IBUPO                                                | 0.72 (0.13-3.61)                     | IBUPO                                             | 0.75 (0.14-3.81)                     | IBUPO                                               | 0.76 (0.15-3.90)                     |                                                                |                                      |
| IBUIVHIGHDOSE                                        | 0.31 (0.02-3.52)                     | IBUIVHIGHDOSE                                     | 0.29 (0.02-3.27)                     | IBUIVHIGHDOSE                                       | 0.32 (0.02-3.74)                     |                                                                |                                      |
| IBUIVCONT                                            | 1.12 (0.10-12.50)                    | IBUIVCONT                                         | 1.15 (0.11-13.03)                    | IBUIVCONT                                           | 1.21 (0.11-14.20)                    |                                                                |                                      |
| IBUIV                                                | 0.41 (0.06-2.35)                     | IBUIV                                             | 0.43 (0.07-2.51)                     | IBUIV                                               | 0.44 (0.07-2.50)                     |                                                                |                                      |
| PLAC/NORX                                            | 0.46 (0.07-2.82)                     | PLAC/NORX                                         | 0.48 (0.07-2.89)                     | PLAC/NORX                                           | 0.50 (0.08-3.11)                     |                                                                |                                      |
| IBUPO <i>versus</i>                                  |                                      | IBUPO <i>versus</i>                               |                                      | IBUPO <i>versus</i>                                 |                                      |                                                                |                                      |
| IBUIVHIGHDOSE                                        | 0.43 (0.06-2.95)                     | IBUIVHIGHDOSE                                     | 0.38 (0.05-2.75)                     | IBUIVHIGHDOSE                                       | 0.42 (0.06-2.82)                     |                                                                |                                      |
| IBUIVCONT                                            | 1.55 (0.30-9.83)                     | IBUIVCONT                                         | 1.52 (0.30-9.33)                     | IBUIVCONT                                           | 1.55 (0.29-10.41)                    |                                                                |                                      |
| IBUIV                                                | 0.57 (0.28-1.15)                     | IBUIV                                             | 0.58 (0.29-1.15)                     | IBUIV                                               | 0.58 (0.28-1.14)                     |                                                                |                                      |
| PLAC/NORX                                            | 0.64 (0.28-1.45)                     | PLAC/NORX                                         | 0.64 (0.28-1.46)                     | PLAC/NORX                                           | 0.66 (0.28-1.49)                     |                                                                |                                      |
| IBUIVHIGHDOSE <i>versus</i>                          |                                      | IBUIVHIGHDOSE <i>versus</i>                       |                                      | IBUIVHIGHDOSE <i>versus</i>                         |                                      |                                                                |                                      |
| IBUIVCONT                                            | 3.68 (0.33-47.36)                    | IBUIVCONT                                         | 4.02 (0.39-50.24)                    | IBUIVCONT                                           | 3.68 (0.35-46.45)                    |                                                                |                                      |
| IBUIV                                                | 1.34 (0.22-8.78)                     | IBUIV                                             | 1.49 (0.24-10.33)                    | IBUIV                                               | 1.37 (0.21-9.41)                     |                                                                |                                      |
| PLAC/NORX                                            | 1.50 (0.22-10.76)                    | PLAC/NORX                                         | 1.65 (0.23-13.45)                    | PLAC/NORX                                           | 1.60 (0.23-12.08)                    |                                                                |                                      |
| IBUIVCONT <i>versus</i>                              |                                      | IBUIVCONT <i>versus</i>                           |                                      | IBUIVCONT <i>versus</i>                             |                                      |                                                                |                                      |
| IBUIV                                                | 0.37 (0.06-1.66)                     | IBUIV                                             | 0.38 (0.07-1.66)                     | IBUIV                                               | 0.38 (0.06-1.71)                     |                                                                |                                      |
| PLAC/NORX                                            | 0.41 (0.06-2.20)                     | PLAC/NORX                                         | 0.42 (0.07-2.10)                     | PLAC/NORX                                           | 0.43 (0.06-2.16)                     |                                                                |                                      |
| IBUIV <i>versus</i>                                  |                                      | IBUIV <i>versus</i>                               |                                      | IBUIV <i>versus</i>                                 |                                      |                                                                |                                      |
| PLAC/NORX                                            | 1.12 (0.55-2.35)                     | PLAC/NORX                                         | 1.11 (0.54-2.29)                     | PLAC/NORX                                           | 1.15 (0.55-2.33)                     |                                                                |                                      |
| Common within-network between-study variance         | 0.05 (0.00-0.45)                     | Common within-network between-study variance      | 0.04 (0.00-0.46)                     | Common within-network between-study variance        | 0.04 (0.00-0.44)                     | Common within-network between-study variance                   | 0.05 (0.00-0.73)                     |
| Regression coefficient (log OR scale)                | -0.022 (-0.192-0.143)                | Regression coefficient (log OR scale)             | 0.000 (-0.001-0.001)                 | Regression coefficient (log OR scale)               | 0.003 (-0.039-0.048)                 | Regression coefficient (log OR scale)                          | 0.008 (-0.086-0.106)                 |

**eTable 44. Meta-regression Analysis Corresponding SUCRA values: Risk of Necrotizing Enterocolitis**

| Mean Gestational Age |                 | Mean Birth Weight |                 | Year of Publication |                 | Age of initiation of Treatment |                 |
|----------------------|-----------------|-------------------|-----------------|---------------------|-----------------|--------------------------------|-----------------|
| Treatment            | Mean SUCRA (SD) | Treatment         | Mean SUCRA (SD) | Treatment           | Mean SUCRA (SD) | Treatment                      | Mean SUCRA (SD) |
| PARAPO               | 0.61 (0.25)     | PARAPO            | 0.64 (0.24)     | PARAPO              | 0.64 (0.24)     | PARAPO                         | 0.75 (0.29)     |
| INDOTHERS            | 0.06 (0.09)     | INDOTHERS         | 0.06 (0.08)     | INDOTHERS           | 0.06 (0.09)     | INDOTHERS                      | 0.01 (0.05)     |
| INDOIVCONT           | 0.63 (0.27)     | INDOIVCONT        | 0.64 (0.27)     | INDOIVCONT          | 0.61 (0.28)     | INDOIVCONT                     | 0.57 (0.29)     |
| INDOIV               | 0.20 (0.11)     | INDOIV            | 0.21 (0.11)     | INDOIV              | 0.21 (0.11)     | INDOIV                         | 0.27 (0.16)     |
| IBUPOHIGHDOSE        | 0.76 (0.27)     | IBUPOHIGHDOSE     | 0.75 (0.28)     | IBUPOHIGHDOSE       | 0.74 (0.28)     | IBUPO                          | 0.68 (0.23)     |
| IBUPO                | 0.72 (0.14)     | IBUPO             | 0.71 (0.15)     | IBUPO               | 0.71 (0.15)     | IBUIVCONT                      | 0.79 (0.25)     |
| IBUIVHIGHDOSE        | 0.33 (0.32)     | IBUIVHIGHDOSE     | 0.30 (0.31)     | IBUIVHIGHDOSE       | 0.32 (0.31)     | IBUIV                          | 0.43 (0.17)     |
| IBUIVCONT            | 0.80 (0.24)     | IBUIVCONT         | 0.80 (0.24)     | IBUIVCONT           | 0.80 (0.24)     | PLAC/NORX                      | 0.51 (0.20)     |
| IBUIV                | 0.41 (0.14)     | IBUIV             | 0.42 (0.13)     | IBUIV               | 0.41 (0.14)     |                                |                 |
| PLAC/NORX            | 0.48 (0.19)     | PLAC/NORX         | 0.48 (0.19)     | PLAC/NORX           | 0.49 (0.19)     |                                |                 |

## **References in the Supplement:**

1. Higgins J, Green S. Cochrane Handbook for Systematic Reviews of Interventions Version 5.1.0 [updated March 2011]. The Cochrane Collaboration, 2011. <http://handbook.cochrane.org>. Accessed January 13, 2018
2. Akl EA, Sun X, Busse JW, Johnston BC, Briel M, Mulla S, et al. Specific instructions for estimating unclearly reported blinding status in randomized trials were reliable and valid. *J Clin Epidemiol*. 2012;65(3):262-7
3. Jansen JPT, Thomas; Cappelleri, Joseph C; Daw, Jessica; Andes, Sherry; Eldessouki, Randa; Salanti, Georgia. Indirect treatment comparison/network meta-analysis study questionnaire to assess relevance and credibility to inform health care decision making: an ISPOR-AMCP-NPC Good Practice Task Force report. *Value in Health*. 2014;17(2):157-73.
4. Salanti G, Ades A, Ioannidis JP. Graphical methods and numerical summaries for presenting results from multiple-treatment meta-analysis: an overview and tutorial. *Journal of clinical epidemiology*. 2011;64(2):163-71.
5. Guyatt G, Oxman AD, Akl EA, Kunz R, Vist G, Brozek J, et al. GRADE guidelines: 1. Introduction-GRADE evidence profiles and summary of findings tables. *Journal of clinical epidemiology*. 2011;64(4):383-94.
6. Guyatt GH, Oxman AD, Vist G, Kunz R, Brozek J, Alonso-Coello P, et al. GRADE guidelines: 4. Rating the quality of evidence--study limitations (risk of bias). *Journal of clinical epidemiology*. 2011;64(4):407-15.
7. Guyatt GH, Oxman AD, Kunz R, Brozek J, Alonso-Coello P, Rind D, et al. GRADE guidelines 6. Rating the quality of evidence--imprecision. *Journal of clinical epidemiology*. 2011;64(12):1283-93.
8. Guyatt GH, Oxman AD, Kunz R, Woodcock J, Brozek J, Helfand M, et al. GRADE guidelines: 7. Rating the quality of evidence--inconsistency. *Journal of clinical epidemiology*. 2011;64(12):1294-302.
9. Guyatt GH, Oxman AD, Montori V, Vist G, Kunz R, Brozek J, et al. GRADE guidelines: 5. Rating the quality of evidence--publication bias. *Journal of clinical epidemiology*. 2011;64(12):1277-82.
10. Puhan MA, Schunemann HJ, Murad MH, Li T, Brignardello-Petersen R, Singh JA, et al. A GRADE Working Group approach for rating the quality of treatment effect estimates from network meta-analysis. *BMJ*. 2014;349:g5630.
11. Donegan S, Williamson P, Gamble C, Tudur-Smith C. Indirect comparisons: a review of reporting and methodological quality. *PLoS One*. 2010;5(11):e11054.
12. Baker SG, Kramer BS. The transitive fallacy for randomized trials: if A bests B and B bests C in separate trials, is A better than C? *BMC Med Res Methodol*. 2002;2:13.
13. Cipriani A, Higgins JP, Geddes JR, Salanti G. Conceptual and technical challenges in network meta-analysis. *Annals of internal medicine*. 2013;159(2):130-7.
14. Van Valkenhoef G, Dias S, Ades AE, Welton NJ. Automated generation of node-splitting models for assessment of inconsistency in network meta-analysis. *Research Synthesis Methods*. 2016;7(1):80-93.
15. van Valkenhoef G, Lu G, de Brock B, Hillege H, Ades AE, Welton NJ. Automating network meta-analysis. *Res Synth Methods*. 2012;3(4):285-99.
16. Friedrich JO, Adhikari NK, Beyene J. Inclusion of zero total event trials in meta-analyses maintains analytic consistency and incorporates all available data. *BMC Medical Research Methodology*. 2007;7:5.
17. White IR, Barrett JK, Jackson D, Higgins JP. Consistency and inconsistency in network meta-analysis: model estimation using multivariate meta-regression. *Res Synth Methods*. 2012;3(2):111-25
